# Supplementary material for: Chicken Peripheral Blood Mononuclear Cells Response to Avian Leukosis Virus Subgroup J Infection Assessed by Single-Cell RNA Sequencing
Source: Front Microbiol. 2022 Mar 14;13:800618. doi: 10.3389/fmicb.2022.800618 (PMC8964181; doi:10.3389/fmicb.2022.800618)
Supplement: Supplementary file 5 [file Table_5.XLSX]

## Sheet: Cluster 0
Additional file 6：DEGs found in each cluster between the ALV-J infected and control samples.
Cluster	GeneID	control	ALV-J	cells.1	cells.2	pct.1	pct.2	log2FC	p_value	p_val_adjust	significance	Symbol	Description	KEGG_A_class	KEGG_B_class	Pathway	K_ID	GO Component	GO Function	GO Process
0	ENSGALG00000038671	4.89535	16.6546	2745	6039	0.19	0.484	1.76644	4.54e-190	1.01e-185	up	-	uncharacterized LOC422090 [Source:NCBI gene;Acc:422090]	-	-	-	-	-	-	-
0	ENSGALG00000052801	3.75581	9.77059	2745	6039	0.145	0.332	1.37932	4.76e-85	1.06e-80	up	-	-	-	-	-	-	-	-	-
0	ENSGALG00000031430	21.3106	49.422	2745	6039	0.403	0.572	1.21358	1.31e-81	2.91e-77	up	-	selectin E [Source:NCBI gene;Acc:424402]	Environmental Information Processing;Human Diseases	Signaling molecules and interaction;Endocrine and metabolic diseases	ko04514//Cell adhesion molecules (CAMs);ko04933//AGE-RAGE signaling pathway in diabetic complications	K06494;K06494	GO:0016020//membrane;GO:0016021//integral component of membrane	-	GO:0007155//cell adhesion
0	ENSGALG00000043329	3.80737	10.1922	2745	6039	0.14	0.309	1.4206	1.3e-74	2.87e-70	up	-	prothymosin alpha [Source:NCBI gene;Acc:424931]	-	-	-	-	-	-	-
0	ENSGALG00000014297	3.93161	10.965	2745	6039	0.148	0.308	1.47971	3.3e-74	7.31e-70	up	IRF7	interferon regulatory factor 7 [Source:NCBI gene;Acc:396330]	Human Diseases;Human Diseases;Organismal Systems;Organismal Systems;Organismal Systems;Organismal Systems	Infectious diseases;Infectious diseases;Immune system;Immune system;Immune system;Immune system	ko05168//Herpes simplex infection;ko05164//Influenza A;ko04621//NOD-like receptor signaling pathway;ko04620//Toll-like receptor signaling pathway;ko04622//RIG-I-like receptor signaling pathway;ko04623//Cytosolic DNA-sensing pathway	K09447;K09447;K09447;K09447;K09447;K09447	GO:0005634//nucleus;GO:0005654//nucleoplasm;GO:0005737//cytoplasm;GO:0005829//cytosol	GO:0000978//RNA polymerase II proximal promoter sequence-specific DNA binding;GO:0000981//DNA-binding transcription factor activity, RNA polymerase II-specific;GO:0000987//proximal promoter sequence-specific DNA binding;GO:0001158//enhancer sequence-specific DNA binding;GO:0003677//DNA binding;GO:0003700//DNA-binding transcription factor activity;GO:0005515//protein binding;GO:0044212//transcript…	GO:0002376//immune system process;GO:0002819//regulation of adaptive immune response;GO:0006355//regulation of transcription, DNA-templated;GO:0010468//regulation of gene expression;GO:0016064//immunoglobulin mediated immune response;GO:0032481//positive regulation of type I interferon production;GO:0032607//interferon-alpha production;GO:0032608//interferon-beta production;GO:0032727//positive r…
0	ENSGALG00000030871	2.92988	7.36384	2745	6039	0.121	0.265	1.32962	3.78e-62	8.38e-58	up	BCL2L10	BCL2 like 10 [Source:NCBI gene;Acc:395193]	-	-	-	-	GO:0005741//mitochondrial outer membrane;GO:0005886//plasma membrane;GO:0016020//membrane;GO:0016021//integral component of membrane	GO:0042803//protein homodimerization activity;GO:0046982//protein heterodimerization activity	GO:0006915//apoptotic process;GO:0008630//intrinsic apoptotic signaling pathway in response to DNA damage;GO:0042981//regulation of apoptotic process;GO:0097192//extrinsic apoptotic signaling pathway in absence of ligand
0	ENSGALG00000005512	3.75483	7.76879	2745	6039	0.149	0.262	1.04894	1.09e-41	2.42e-37	up	KIAA1671	KIAA1671 [Source:NCBI gene;Acc:768701]	-	-	-	-	-	-	-
0	ENSGALG00000053682	6.81277	0.207891	2745	6039	0.255	0.009	-5.03434	0	3.99e-304	down	MHCIY	MHC-like class I Y [Source:NCBI gene;Acc:768350]	-	-	-	-	GO:0016020//membrane;GO:0016021//integral component of membrane	-	-
0	ENSGALG00000054766	27.351	10.1146	2745	6039	0.668	0.344	-1.43515	4e-257	8.86e-253	down	ITGA2B	integrin subunit alpha 2b [Source:NCBI gene;Acc:101749783]	Cellular Processes;Cellular Processes;Environmental Information Processing	Cell motility;Cellular community - eukaryotes;Signaling molecules and interaction	ko04810//Regulation of actin cytoskeleton;ko04510//Focal adhesion;ko04512//ECM-receptor interaction	K06476;K06476;K06476	GO:0005925//focal adhesion;GO:0008305//integrin complex;GO:0009897//external side of plasma membrane;GO:0009986//cell surface;GO:0070062//extracellular exosome	GO:0042802//identical protein binding;GO:0050840//extracellular matrix binding	GO:0007155//cell adhesion;GO:0007160//cell-matrix adhesion
0	ENSGALG00000027069	13.9602	6.21932	2745	6039	0.423	0.207	-1.16649	2.85e-95	6.31e-91	down	TSC22D3	TSC22 domain family member 3 [Source:NCBI gene;Acc:768091]	-	-	-	-	GO:0005634//nucleus	GO:0003700//DNA-binding transcription factor activity	GO:0006355//regulation of transcription, DNA-templated;GO:0006970//response to osmotic stress;GO:0070236//negative regulation of activation-induced cell death of T cells
0	ENSGALG00000012802	7.76431	3.04106	2745	6039	0.27	0.118	-1.35229	6.39e-68	1.42e-63	down	F13A1	coagulation factor XIII A chain [Source:NCBI gene;Acc:395420]	-	-	-	-	-	GO:0003810//protein-glutamine gamma-glutamyltransferase activity;GO:0046872//metal ion binding	GO:0007596//blood coagulation;GO:0018149//peptide cross-linking;GO:0072378//blood coagulation, fibrin clot formation

## Sheet: Cluster 1
Cluster	GeneID	control	ALV-J	cells.1	cells.2	pct.1	pct.2	log2FC	p_value	p_val_adjust	significance	Symbol	Description	KEGG_A_class	KEGG_B_class	Pathway	K_ID	GO Component	GO Function	GO Process
1	ENSGALG00000038671	4.41203	15.5766	1196	3441	0.252	0.607	1.81986	1.25e-127	2.78e-123	up	-	uncharacterized LOC422090 [Source:NCBI gene;Acc:422090]	-	-	-	-	-	-	-
1	ENSGALG00000008022	10.0011	20.7919	1196	3441	0.467	0.704	1.05586	3.32e-78	7.36e-74	up	TAPBP	TAP binding protein [Source:NCBI gene;Acc:417048]	-	-	-	-	GO:0016020//membrane;GO:0016021//integral component of membrane	-	-
1	ENSGALG00000052801	2.67462	8.93595	1196	3441	0.161	0.414	1.74029	2.51e-69	5.56e-65	up	-	-	-	-	-	-	-	-	-
1	ENSGALG00000033513	2.40854	7.24442	1196	3441	0.14	0.332	1.58871	1.32e-45	2.94e-41	up	ELL	elongation factor for RNA polymerase II [Source:NCBI gene;Acc:420124]	-	-	-	-	GO:0008023//transcription elongation factor complex;GO:0015030//Cajal body;GO:0016607//nuclear speck;GO:0035327//transcriptionally active chromatin;GO:0035363//histone locus body	GO:0019902//phosphatase binding	GO:0006366//transcription by RNA polymerase II;GO:0006368//transcription elongation from RNA polymerase II promoter;GO:0010923//negative regulation of phosphatase activity;GO:0032968//positive regulation of transcription elongation from RNA polymerase II promoter;GO:0042795//snRNA transcription by RNA polymerase II;GO:0042796//snRNA transcription by RNA polymerase III;GO:0045945//positive regulat…
1	ENSGALG00000031430	8.53086	22.4953	1196	3441	0.323	0.485	1.39886	1.58e-43	3.51e-39	up	-	selectin E [Source:NCBI gene;Acc:424402]	Environmental Information Processing;Human Diseases	Signaling molecules and interaction;Endocrine and metabolic diseases	ko04514//Cell adhesion molecules (CAMs);ko04933//AGE-RAGE signaling pathway in diabetic complications	K06494;K06494	GO:0016020//membrane;GO:0016021//integral component of membrane	-	GO:0007155//cell adhesion
1	ENSGALG00000043329	3.0227	8.45642	1196	3441	0.173	0.351	1.48421	7.24e-42	1.61e-37	up	-	prothymosin alpha [Source:NCBI gene;Acc:424931]	-	-	-	-	-	-	-
1	ENSGALG00000019552	7.59859	15.9328	1196	3441	0.353	0.527	1.06819	7.59e-41	1.68e-36	up	SERPINB10	serpin family B member 2 [Source:NCBI gene;Acc:420896]	-	-	-	-	GO:0005615//extracellular space	GO:0004867//serine-type endopeptidase inhibitor activity	GO:0010951//negative regulation of endopeptidase activity
1	ENSGALG00000030871	2.93159	6.79715	1196	3441	0.174	0.339	1.21324	9.87e-33	2.19e-28	up	BCL2L10	BCL2 like 10 [Source:NCBI gene;Acc:395193]	-	-	-	-	GO:0005741//mitochondrial outer membrane;GO:0005886//plasma membrane;GO:0016020//membrane;GO:0016021//integral component of membrane	GO:0042803//protein homodimerization activity;GO:0046982//protein heterodimerization activity	GO:0006915//apoptotic process;GO:0008630//intrinsic apoptotic signaling pathway in response to DNA damage;GO:0042981//regulation of apoptotic process;GO:0097192//extrinsic apoptotic signaling pathway in absence of ligand
1	ENSGALG00000010174	2.10929	5.5541	1196	3441	0.132	0.278	1.3968	1.67e-31	3.7e-27	up	SLC35B2	solute carrier family 35 member B2 [Source:NCBI gene;Acc:428575]	-	-	-	-	GO:0005794//Golgi apparatus;GO:0016020//membrane;GO:0016021//integral component of membrane;GO:0030173//integral component of Golgi membrane;GO:0030176//integral component of endoplasmic reticulum membrane	GO:0022857//transmembrane transporter activity;GO:0046964//3'-phosphoadenosine 5'-phosphosulfate transmembrane transporter activity	GO:0046963//3'-phosphoadenosine 5'-phosphosulfate transport;GO:0055085//transmembrane transport;GO:1902559//3'-phospho-5'-adenylyl sulfate transmembrane transport
1	ENSGALG00000014297	2.78741	6.76956	1196	3441	0.166	0.301	1.28014	3.5e-29	7.75e-25	up	IRF7	interferon regulatory factor 7 [Source:NCBI gene;Acc:396330]	Human Diseases;Human Diseases;Organismal Systems;Organismal Systems;Organismal Systems;Organismal Systems	Infectious diseases;Infectious diseases;Immune system;Immune system;Immune system;Immune system	ko05168//Herpes simplex infection;ko05164//Influenza A;ko04621//NOD-like receptor signaling pathway;ko04620//Toll-like receptor signaling pathway;ko04622//RIG-I-like receptor signaling pathway;ko04623//Cytosolic DNA-sensing pathway	K09447;K09447;K09447;K09447;K09447;K09447	GO:0005634//nucleus;GO:0005654//nucleoplasm;GO:0005737//cytoplasm;GO:0005829//cytosol	GO:0000978//RNA polymerase II proximal promoter sequence-specific DNA binding;GO:0000981//DNA-binding transcription factor activity, RNA polymerase II-specific;GO:0000987//proximal promoter sequence-specific DNA binding;GO:0001158//enhancer sequence-specific DNA binding;GO:0003677//DNA binding;GO:0003700//DNA-binding transcription factor activity;GO:0005515//protein binding;GO:0044212//transcript…	GO:0002376//immune system process;GO:0002819//regulation of adaptive immune response;GO:0006355//regulation of transcription, DNA-templated;GO:0010468//regulation of gene expression;GO:0016064//immunoglobulin mediated immune response;GO:0032481//positive regulation of type I interferon production;GO:0032607//interferon-alpha production;GO:0032608//interferon-beta production;GO:0032727//positive r…
1	ENSGALG00000053682	4.77709	0.174392	1196	3441	0.277	0.011	-4.77573	4.81e-163	1.07e-158	down	MHCIY	MHC-like class I Y [Source:NCBI gene;Acc:768350]	-	-	-	-	GO:0016020//membrane;GO:0016021//integral component of membrane	-	-
1	ENSGALG00000054766	28.3215	11.502	1196	3441	0.829	0.5	-1.30001	3.67e-159	8.13e-155	down	ITGA2B	integrin subunit alpha 2b [Source:NCBI gene;Acc:101749783]	Cellular Processes;Cellular Processes;Environmental Information Processing	Cell motility;Cellular community - eukaryotes;Signaling molecules and interaction	ko04810//Regulation of actin cytoskeleton;ko04510//Focal adhesion;ko04512//ECM-receptor interaction	K06476;K06476;K06476	GO:0005925//focal adhesion;GO:0008305//integrin complex;GO:0009897//external side of plasma membrane;GO:0009986//cell surface;GO:0070062//extracellular exosome	GO:0042802//identical protein binding;GO:0050840//extracellular matrix binding	GO:0007155//cell adhesion;GO:0007160//cell-matrix adhesion
1	ENSGALG00000012456	27.8923	13.2913	1196	3441	0.815	0.549	-1.06939	1.66e-111	3.67e-107	down	RAC2	Rac family small GTPase 2 [Source:NCBI gene;Acc:418044]	Environmental Information Processing;Cellular Processes;Cellular Processes;Environmental Information Processing;Cellular Processes;Environmental Information Processing	Signal transduction;Cell motility;Cellular community - eukaryotes;Signal transduction;Cellular community - eukaryotes;Signal transduction	ko04010//MAPK signaling pathway;ko04810//Regulation of actin cytoskeleton;ko04510//Focal adhesion;ko04310//Wnt signaling pathway;ko04520//Adherens junction;ko04370//VEGF signaling pathway	K07860;K07860;K07860;K07860;K07860;K07860	GO:0005622//intracellular;GO:0005635//nuclear envelope;GO:0005737//cytoplasm;GO:0005829//cytosol;GO:0005884//actin filament;GO:0005886//plasma membrane;GO:0016020//membrane;GO:0030027//lamellipodium;GO:0031410//cytoplasmic vesicle;GO:0042995//cell projection	GO:0000166//nucleotide binding;GO:0003924//GTPase activity;GO:0005525//GTP binding;GO:0019887//protein kinase regulator activity;GO:0019901//protein kinase binding	GO:0006935//chemotaxis;GO:0007015//actin filament organization;GO:0007186//G protein-coupled receptor signaling pathway;GO:0007264//small GTPase mediated signal transduction;GO:0007266//Rho protein signal transduction;GO:0008045//motor neuron axon guidance;GO:0008284//positive regulation of cell proliferation;GO:0010592//positive regulation of lamellipodium assembly;GO:0010810//regulation of cell…
1	ENSGALG00000012802	13.9261	5.20005	1196	3441	0.55	0.259	-1.42119	6.73e-84	1.49e-79	down	F13A1	coagulation factor XIII A chain [Source:NCBI gene;Acc:395420]	-	-	-	-	-	GO:0003810//protein-glutamine gamma-glutamyltransferase activity;GO:0046872//metal ion binding	GO:0007596//blood coagulation;GO:0018149//peptide cross-linking;GO:0072378//blood coagulation, fibrin clot formation
1	ENSGALG00000014727	15.8599	7.7425	1196	3441	0.611	0.371	-1.03451	2.07e-63	4.58e-59	down	PDE4D	phosphodiesterase 4D [Source:NCBI gene;Acc:769469]	Metabolism	Nucleotide metabolism	ko00230//Purine metabolism	K13293	GO:0005813//centrosome;GO:0005829//cytosol;GO:0005886//plasma membrane;GO:0005891//voltage-gated calcium channel complex;GO:0031965//nuclear membrane;GO:0034704//calcium channel complex	GO:0004114//3',5'-cyclic-nucleotide phosphodiesterase activity;GO:0004115//3',5'-cyclic-AMP phosphodiesterase activity;GO:0005515//protein binding;GO:0008081//phosphoric diester hydrolase activity;GO:0008144//drug binding;GO:0016787//hydrolase activity;GO:0030552//cAMP binding;GO:0044325//ion channel binding;GO:0046872//metal ion binding;GO:0051117//ATPase binding;GO:0097110//scaffold protein bin…	GO:0002027//regulation of heart rate;GO:0006198//cAMP catabolic process;GO:0006939//smooth muscle contraction;GO:0007165//signal transduction;GO:0007568//aging;GO:0010880//regulation of release of sequestered calcium ion into cytosol by sarcoplasmic reticulum;GO:0030593//neutrophil chemotaxis;GO:0032729//positive regulation of interferon-gamma production;GO:0032743//positive regulation of interle…
1	ENSGALG00000027069	13.1389	5.98239	1196	3441	0.524	0.28	-1.13505	4.4e-55	9.75e-51	down	TSC22D3	TSC22 domain family member 3 [Source:NCBI gene;Acc:768091]	-	-	-	-	GO:0005634//nucleus	GO:0003700//DNA-binding transcription factor activity	GO:0006355//regulation of transcription, DNA-templated;GO:0006970//response to osmotic stress;GO:0070236//negative regulation of activation-induced cell death of T cells
1	ENSGALG00000023294	9.90859	4.3775	1196	3441	0.468	0.237	-1.17857	1.2e-51	2.65e-47	down	RPLP0	ribosomal protein lateral stalk subunit P0 [Source:NCBI gene;Acc:395835]	Genetic Information Processing	Translation	ko03010//Ribosome	K02941	GO:0005622//intracellular;GO:0005634//nucleus;GO:0005737//cytoplasm;GO:0005783//endoplasmic reticulum;GO:0005829//cytosol;GO:0005840//ribosome;GO:0014069//postsynaptic density;GO:0022625//cytosolic large ribosomal subunit;GO:0030425//dendrite;GO:0036464//cytoplasmic ribonucleoprotein granule;GO:0098794//postsynapse;GO:1990904//ribonucleoprotein complex	GO:0003735//structural constituent of ribosome;GO:0070180//large ribosomal subunit rRNA binding	GO:0000027//ribosomal large subunit assembly;GO:0002181//cytoplasmic translation;GO:0042254//ribosome biogenesis;GO:0071353//cellular response to interleukin-4
1	ENSGALG00000030781	7.85001	3.01351	1196	3441	0.361	0.164	-1.38125	1.19e-46	2.64e-42	down	CA2	carbonic anhydrase 2 [Source:NCBI gene;Acc:396257]	Metabolism	Energy metabolism	ko00910//Nitrogen metabolism	K18245	GO:0005623//cell;GO:0005737//cytoplasm;GO:0005829//cytosol;GO:0005886//plasma membrane;GO:0016020//membrane;GO:0043209//myelin sheath;GO:0045177//apical part of cell	GO:0004064//arylesterase activity;GO:0004089//carbonate dehydratase activity;GO:0008270//zinc ion binding;GO:0016829//lyase activity;GO:0046872//metal ion binding	GO:0002009//morphogenesis of an epithelium;GO:0015670//carbon dioxide transport;GO:0032230//positive regulation of synaptic transmission, GABAergic;GO:0032849//positive regulation of cellular pH reduction;GO:0038166//angiotensin-activated signaling pathway;GO:0044070//regulation of anion transport;GO:0046903//secretion;GO:0051453//regulation of intracellular pH;GO:0071244//cellular response to ca…
1	ENSGALG00000011153	8.66421	4.20382	1196	3441	0.419	0.23	-1.04337	7.82e-36	1.73e-31	down	LY75	lymphocyte antigen 75 [Source:NCBI gene;Acc:424192]	-	-	-	-	GO:0009897//external side of plasma membrane;GO:0016020//membrane;GO:0016021//integral component of membrane	GO:0004888//transmembrane signaling receptor activity	-

## Sheet: Cluster 2
Cluster	GeneID	control	ALV-J	cells.1	cells.2	pct.1	pct.2	log2FC	p_value	p_val_adjust	significance	Symbol	Description	KEGG_A_class	KEGG_B_class	Pathway	K_ID	GO Component	GO Function	GO Process
2	ENSGALG00000043329	3.98815	11.4102	2489	220	0.121	0.305	1.51653	1.18e-11	2.62e-07	up	-	prothymosin alpha [Source:NCBI gene;Acc:424931]	-	-	-	-	-	-	-
2	ENSGALG00000014297	3.41246	8.90302	2489	220	0.106	0.255	1.38348	2.65e-08	0.000587167	up	IRF7	interferon regulatory factor 7 [Source:NCBI gene;Acc:396330]	Human Diseases;Human Diseases;Organismal Systems;Organismal Systems;Organismal Systems;Organismal Systems	Infectious diseases;Infectious diseases;Immune system;Immune system;Immune system;Immune system	ko05168//Herpes simplex infection;ko05164//Influenza A;ko04621//NOD-like receptor signaling pathway;ko04620//Toll-like receptor signaling pathway;ko04622//RIG-I-like receptor signaling pathway;ko04623//Cytosolic DNA-sensing pathway	K09447;K09447;K09447;K09447;K09447;K09447	GO:0005634//nucleus;GO:0005654//nucleoplasm;GO:0005737//cytoplasm;GO:0005829//cytosol	GO:0000978//RNA polymerase II proximal promoter sequence-specific DNA binding;GO:0000981//DNA-binding transcription factor activity, RNA polymerase II-specific;GO:0000987//proximal promoter sequence-specific DNA binding;GO:0001158//enhancer sequence-specific DNA binding;GO:0003677//DNA binding;GO:0003700//DNA-binding transcription factor activity;GO:0005515//protein binding;GO:0044212//transcript…	GO:0002376//immune system process;GO:0002819//regulation of adaptive immune response;GO:0006355//regulation of transcription, DNA-templated;GO:0010468//regulation of gene expression;GO:0016064//immunoglobulin mediated immune response;GO:0032481//positive regulation of type I interferon production;GO:0032607//interferon-alpha production;GO:0032608//interferon-beta production;GO:0032727//positive r…
2	ENSGALG00000052801	4.08445	10.4403	2489	220	0.132	0.323	1.35395	3.79e-11	8.39e-07	up	-	-	-	-	-	-	-	-	-
2	ENSGALG00000038671	5.71203	13.9395	2489	220	0.177	0.4	1.2871	7.17e-13	1.59e-08	up	-	uncharacterized LOC422090 [Source:NCBI gene;Acc:422090]	-	-	-	-	-	-	-
2	ENSGALG00000031430	15.9762	34.34	2489	220	0.32	0.486	1.10397	8.88e-08	0.00196904	up	-	selectin E [Source:NCBI gene;Acc:424402]	Environmental Information Processing;Human Diseases	Signaling molecules and interaction;Endocrine and metabolic diseases	ko04514//Cell adhesion molecules (CAMs);ko04933//AGE-RAGE signaling pathway in diabetic complications	K06494;K06494	GO:0016020//membrane;GO:0016021//integral component of membrane	-	GO:0007155//cell adhesion
2	ENSGALG00000011464	26.0887	11.4464	2489	220	0.574	0.345	-1.18853	7.45e-15	1.65e-10	down	EIF5	eukaryotic translation initiation factor 5 [Source:NCBI gene;Acc:423479]	Genetic Information Processing	Translation	ko03013//RNA transport	K03262	GO:0005737//cytoplasm;GO:0005829//cytosol;GO:0005886//plasma membrane	GO:0003743//translation initiation factor activity;GO:0005515//protein binding	GO:0006413//translational initiation;GO:0006446//regulation of translational initiation
2	ENSGALG00000054766	22.4561	9.48282	2489	220	0.527	0.305	-1.24372	2.51e-14	5.55e-10	down	ITGA2B	integrin subunit alpha 2b [Source:NCBI gene;Acc:101749783]	Cellular Processes;Cellular Processes;Environmental Information Processing	Cell motility;Cellular community - eukaryotes;Signaling molecules and interaction	ko04810//Regulation of actin cytoskeleton;ko04510//Focal adhesion;ko04512//ECM-receptor interaction	K06476;K06476;K06476	GO:0005925//focal adhesion;GO:0008305//integrin complex;GO:0009897//external side of plasma membrane;GO:0009986//cell surface;GO:0070062//extracellular exosome	GO:0042802//identical protein binding;GO:0050840//extracellular matrix binding	GO:0007155//cell adhesion;GO:0007160//cell-matrix adhesion
2	ENSGALG00000053682	8.78188	0.134084	2489	220	0.267	0.005	-6.03332	1.36e-26	3e-22	down	MHCIY	MHC-like class I Y [Source:NCBI gene;Acc:768350]	-	-	-	-	GO:0016020//membrane;GO:0016021//integral component of membrane	-	-

## Sheet: Cluster 3
Cluster	GeneID	control	ALV-J	cells.1	cells.2	pct.1	pct.2	log2FC	p_value	p_val_adjust	significance	Symbol	Description	KEGG_A_class	KEGG_B_class	Pathway	K_ID	GO Component	GO Function	GO Process
3	ENSGALG00000038671	4.24768	12.998	545	1967	0.343	0.737	1.61355	1.33e-73	2.95e-69	up	-	uncharacterized LOC422090 [Source:NCBI gene;Acc:422090]	-	-	-	-	-	-	-
3	ENSGALG00000052801	2.00558	6.95334	545	1967	0.183	0.501	1.79369	1.44e-44	3.18e-40	up	-	-	-	-	-	-	-	-	-
3	ENSGALG00000016348	7.44178	15.1239	545	1967	0.503	0.739	1.02311	1.09e-34	2.41e-30	up	SAT1	spermidine/spermine N1-acetyltransferase 1 [Source:NCBI gene;Acc:374006]	Metabolism;Metabolism;Cellular Processes	Global and overview maps;Amino acid metabolism;Cell growth and death	ko01100//Metabolic pathways;ko00330//Arginine and proline metabolism;ko04216//Ferroptosis	K00657;K00657;K00657	GO:0005737//cytoplasm;GO:0005829//cytosol	GO:0004145//diamine N-acetyltransferase activity;GO:0005515//protein binding;GO:0008080//N-acetyltransferase activity;GO:0016740//transferase activity;GO:0016746//transferase activity, transferring acyl groups;GO:0019809//spermidine binding;GO:0042802//identical protein binding	GO:0001525//angiogenesis;GO:0009447//putrescine catabolic process;GO:0032918//spermidine acetylation;GO:0042127//regulation of cell proliferation
3	ENSGALG00000019552	6.95205	14.8038	545	1967	0.435	0.683	1.09046	1.66e-31	3.68e-27	up	SERPINB10	serpin family B member 2 [Source:NCBI gene;Acc:420896]	-	-	-	-	GO:0005615//extracellular space	GO:0004867//serine-type endopeptidase inhibitor activity	GO:0010951//negative regulation of endopeptidase activity
3	ENSGALG00000030871	2.55098	6.37374	545	1967	0.222	0.487	1.32109	4.37e-30	9.69e-26	up	BCL2L10	BCL2 like 10 [Source:NCBI gene;Acc:395193]	-	-	-	-	GO:0005741//mitochondrial outer membrane;GO:0005886//plasma membrane;GO:0016020//membrane;GO:0016021//integral component of membrane	GO:0042803//protein homodimerization activity;GO:0046982//protein heterodimerization activity	GO:0006915//apoptotic process;GO:0008630//intrinsic apoptotic signaling pathway in response to DNA damage;GO:0042981//regulation of apoptotic process;GO:0097192//extrinsic apoptotic signaling pathway in absence of ligand
3	ENSGALG00000043329	4.13014	9.55777	545	1967	0.316	0.552	1.21048	8.05e-27	1.78e-22	up	-	prothymosin alpha [Source:NCBI gene;Acc:424931]	-	-	-	-	-	-	-
3	ENSGALG00000005512	3.88558	8.54408	545	1967	0.323	0.557	1.13679	5.85e-26	1.3e-21	up	KIAA1671	KIAA1671 [Source:NCBI gene;Acc:768701]	-	-	-	-	-	-	-
3	ENSGALG00000047636	3.0333	6.2695	545	1967	0.25	0.492	1.04746	3.46e-24	7.67e-20	up	-	-	-	-	-	-	-	-	-
3	ENSGALG00000033513	2.19359	5.45124	545	1967	0.191	0.403	1.31329	2.95e-21	6.54e-17	up	ELL	elongation factor for RNA polymerase II [Source:NCBI gene;Acc:420124]	-	-	-	-	GO:0008023//transcription elongation factor complex;GO:0015030//Cajal body;GO:0016607//nuclear speck;GO:0035327//transcriptionally active chromatin;GO:0035363//histone locus body	GO:0019902//phosphatase binding	GO:0006366//transcription by RNA polymerase II;GO:0006368//transcription elongation from RNA polymerase II promoter;GO:0010923//negative regulation of phosphatase activity;GO:0032968//positive regulation of transcription elongation from RNA polymerase II promoter;GO:0042795//snRNA transcription by RNA polymerase II;GO:0042796//snRNA transcription by RNA polymerase III;GO:0045945//positive regulat…
3	ENSGALG00000010174	1.7176	4.21643	545	1967	0.161	0.361	1.29563	6.53e-20	1.45e-15	up	SLC35B2	solute carrier family 35 member B2 [Source:NCBI gene;Acc:428575]	-	-	-	-	GO:0005794//Golgi apparatus;GO:0016020//membrane;GO:0016021//integral component of membrane;GO:0030173//integral component of Golgi membrane;GO:0030176//integral component of endoplasmic reticulum membrane	GO:0022857//transmembrane transporter activity;GO:0046964//3'-phosphoadenosine 5'-phosphosulfate transmembrane transporter activity	GO:0046963//3'-phosphoadenosine 5'-phosphosulfate transport;GO:0055085//transmembrane transport;GO:1902559//3'-phospho-5'-adenylyl sulfate transmembrane transport
3	ENSGALG00000031430	4.19017	9.0702	545	1967	0.25	0.419	1.11413	3.04e-14	6.74e-10	up	-	selectin E [Source:NCBI gene;Acc:424402]	Environmental Information Processing;Human Diseases	Signaling molecules and interaction;Endocrine and metabolic diseases	ko04514//Cell adhesion molecules (CAMs);ko04933//AGE-RAGE signaling pathway in diabetic complications	K06494;K06494	GO:0016020//membrane;GO:0016021//integral component of membrane	-	GO:0007155//cell adhesion
3	ENSGALG00000014297	1.79409	4.03756	545	1967	0.171	0.324	1.17023	1.47e-13	3.26e-09	up	IRF7	interferon regulatory factor 7 [Source:NCBI gene;Acc:396330]	Human Diseases;Human Diseases;Organismal Systems;Organismal Systems;Organismal Systems;Organismal Systems	Infectious diseases;Infectious diseases;Immune system;Immune system;Immune system;Immune system	ko05168//Herpes simplex infection;ko05164//Influenza A;ko04621//NOD-like receptor signaling pathway;ko04620//Toll-like receptor signaling pathway;ko04622//RIG-I-like receptor signaling pathway;ko04623//Cytosolic DNA-sensing pathway	K09447;K09447;K09447;K09447;K09447;K09447	GO:0005634//nucleus;GO:0005654//nucleoplasm;GO:0005737//cytoplasm;GO:0005829//cytosol	GO:0000978//RNA polymerase II proximal promoter sequence-specific DNA binding;GO:0000981//DNA-binding transcription factor activity, RNA polymerase II-specific;GO:0000987//proximal promoter sequence-specific DNA binding;GO:0001158//enhancer sequence-specific DNA binding;GO:0003677//DNA binding;GO:0003700//DNA-binding transcription factor activity;GO:0005515//protein binding;GO:0044212//transcript…	GO:0002376//immune system process;GO:0002819//regulation of adaptive immune response;GO:0006355//regulation of transcription, DNA-templated;GO:0010468//regulation of gene expression;GO:0016064//immunoglobulin mediated immune response;GO:0032481//positive regulation of type I interferon production;GO:0032607//interferon-alpha production;GO:0032608//interferon-beta production;GO:0032727//positive r…
3	ENSGALG00000028520	1.96196	4.13081	545	1967	0.189	0.343	1.07413	8.36e-13	1.85e-08	up	CST3	cystatin C [Source:NCBI gene;Acc:396497]	-	-	-	-	GO:0005576//extracellular region;GO:0005615//extracellular space	GO:0004869//cysteine-type endopeptidase inhibitor activity;GO:0005515//protein binding;GO:0030414//peptidase inhibitor activity	GO:0010466//negative regulation of peptidase activity;GO:0010951//negative regulation of endopeptidase activity
3	ENSGALG00000054766	22.2398	9.80988	545	1967	0.888	0.63	-1.18083	6.96e-82	1.54e-77	down	ITGA2B	integrin subunit alpha 2b [Source:NCBI gene;Acc:101749783]	Cellular Processes;Cellular Processes;Environmental Information Processing	Cell motility;Cellular community - eukaryotes;Signaling molecules and interaction	ko04810//Regulation of actin cytoskeleton;ko04510//Focal adhesion;ko04512//ECM-receptor interaction	K06476;K06476;K06476	GO:0005925//focal adhesion;GO:0008305//integrin complex;GO:0009897//external side of plasma membrane;GO:0009986//cell surface;GO:0070062//extracellular exosome	GO:0042802//identical protein binding;GO:0050840//extracellular matrix binding	GO:0007155//cell adhesion;GO:0007160//cell-matrix adhesion
3	ENSGALG00000053682	3.83788	0.218894	545	1967	0.306	0.024	-4.132	3.22e-80	7.13e-76	down	MHCIY	MHC-like class I Y [Source:NCBI gene;Acc:768350]	-	-	-	-	GO:0016020//membrane;GO:0016021//integral component of membrane	-	-
3	ENSGALG00000000824	3.60569	0.787563	545	1967	0.283	0.082	-2.19481	1.91e-34	4.23e-30	down	-	myosin light chain kinase, smooth muscle-like [Source:NCBI gene;Acc:428278]	Cellular Processes;Cellular Processes;Environmental Information Processing;Environmental Information Processing;Organismal Systems	Cell motility;Cellular community - eukaryotes;Signal transduction;Signal transduction;Circulatory system	ko04810//Regulation of actin cytoskeleton;ko04510//Focal adhesion;ko04020//Calcium signaling pathway;ko04371//Apelin signaling pathway;ko04270//Vascular smooth muscle contraction	K00907;K00907;K00907;K00907;K00907	-	GO:0000166//nucleotide binding;GO:0004672//protein kinase activity;GO:0004674//protein serine/threonine kinase activity;GO:0004687//myosin light chain kinase activity;GO:0005524//ATP binding	GO:0006468//protein phosphorylation
3	ENSGALG00000030781	6.18287	2.81408	545	1967	0.424	0.249	-1.13561	2.09e-22	4.62e-18	down	CA2	carbonic anhydrase 2 [Source:NCBI gene;Acc:396257]	Metabolism	Energy metabolism	ko00910//Nitrogen metabolism	K18245	GO:0005623//cell;GO:0005737//cytoplasm;GO:0005829//cytosol;GO:0005886//plasma membrane;GO:0016020//membrane;GO:0043209//myelin sheath;GO:0045177//apical part of cell	GO:0004064//arylesterase activity;GO:0004089//carbonate dehydratase activity;GO:0008270//zinc ion binding;GO:0016829//lyase activity;GO:0046872//metal ion binding	GO:0002009//morphogenesis of an epithelium;GO:0015670//carbon dioxide transport;GO:0032230//positive regulation of synaptic transmission, GABAergic;GO:0032849//positive regulation of cellular pH reduction;GO:0038166//angiotensin-activated signaling pathway;GO:0044070//regulation of anion transport;GO:0046903//secretion;GO:0051453//regulation of intracellular pH;GO:0071244//cellular response to ca…
3	ENSGALG00000002554	4.99547	2.32237	545	1967	0.42	0.228	-1.10502	2.76e-21	6.12e-17	down	TSPAN2	tetraspanin 2 [Source:NCBI gene;Acc:419889]	-	-	-	-	GO:0005886//plasma membrane;GO:0005887//integral component of plasma membrane;GO:0016020//membrane;GO:0016021//integral component of membrane;GO:0043209//myelin sheath	-	GO:0006954//inflammatory response;GO:0007166//cell surface receptor signaling pathway;GO:0014002//astrocyte development;GO:0014005//microglia development;GO:0042552//myelination;GO:0048709//oligodendrocyte differentiation;GO:0061564//axon development
3	ENSGALG00000009421	3.87635	1.54344	545	1967	0.323	0.158	-1.32855	1.3e-20	2.89e-16	down	SRSF5	serine and arginine rich splicing factor 5 [Source:NCBI gene;Acc:423258]	Human Diseases;Genetic Information Processing	Infectious diseases;Transcription	ko05168//Herpes simplex infection;ko03040//Spliceosome	K12893;K12893	GO:0005634//nucleus;GO:0005730//nucleolus;GO:0005829//cytosol;GO:0016607//nuclear speck	GO:0003676//nucleic acid binding;GO:0003723//RNA binding	GO:0000381//regulation of alternative mRNA splicing, via spliceosome;GO:0045292//mRNA cis splicing, via spliceosome
3	ENSGALG00000053601	4.66884	2.20661	545	1967	0.389	0.209	-1.08123	2.39e-18	5.3e-14	down	LPXN	leupaxin [Source:NCBI gene;Acc:423129]	-	-	-	-	GO:0002102//podosome;GO:0005925//focal adhesion	GO:0003712//transcription coregulator activity	GO:0007155//cell adhesion
3	ENSGALG00000015960	4.57311	2.21096	545	1967	0.352	0.209	-1.0485	3.71e-16	8.21e-12	down	RPIA	ribose 5-phosphate isomerase A [Source:NCBI gene;Acc:422931]	Metabolism;Metabolism;Metabolism;Metabolism	Global and overview maps;Global and overview maps;Global and overview maps;Carbohydrate metabolism	ko01100//Metabolic pathways;ko01200//Carbon metabolism;ko01230//Biosynthesis of amino acids;ko00030//Pentose phosphate pathway	K01807;K01807;K01807;K01807	GO:0043231//intracellular membrane-bounded organelle	GO:0004751//ribose-5-phosphate isomerase activity;GO:0042802//identical protein binding	GO:0006014//D-ribose metabolic process;GO:0009052//pentose-phosphate shunt, non-oxidative branch

## Sheet: Cluster 4
Cluster	GeneID	control	ALV-J	cells.1	cells.2	pct.1	pct.2	log2FC	p_value	p_val_adjust	significance	Symbol	Description	KEGG_A_class	KEGG_B_class	Pathway	K_ID	GO Component	GO Function	GO Process
4	ENSGALG00000038671	5.30896	18.6114	660	1194	0.235	0.637	1.80969	5.62e-67	1.25e-62	up	-	uncharacterized LOC422090 [Source:NCBI gene;Acc:422090]	-	-	-	-	-	-	-
4	ENSGALG00000052801	2.73709	8.7417	660	1194	0.126	0.409	1.67527	6.95e-39	1.54e-34	up	-	-	-	-	-	-	-	-	-
4	ENSGALG00000019552	7.59592	17.6875	660	1194	0.286	0.561	1.21943	2.25e-30	4.99e-26	up	SERPINB10	serpin family B member 2 [Source:NCBI gene;Acc:420896]	-	-	-	-	GO:0005615//extracellular space	GO:0004867//serine-type endopeptidase inhibitor activity	GO:0010951//negative regulation of endopeptidase activity
4	ENSGALG00000010174	1.71387	5.28608	660	1194	0.085	0.26	1.62494	1.1e-20	2.43e-16	up	SLC35B2	solute carrier family 35 member B2 [Source:NCBI gene;Acc:428575]	-	-	-	-	GO:0005794//Golgi apparatus;GO:0016020//membrane;GO:0016021//integral component of membrane;GO:0030173//integral component of Golgi membrane;GO:0030176//integral component of endoplasmic reticulum membrane	GO:0022857//transmembrane transporter activity;GO:0046964//3'-phosphoadenosine 5'-phosphosulfate transmembrane transporter activity	GO:0046963//3'-phosphoadenosine 5'-phosphosulfate transport;GO:0055085//transmembrane transport;GO:1902559//3'-phospho-5'-adenylyl sulfate transmembrane transport
4	ENSGALG00000047636	3.23799	6.81362	660	1194	0.148	0.343	1.07332	1.71e-20	3.78e-16	up	-	-	-	-	-	-	-	-	-
4	ENSGALG00000030871	3.76081	8.45637	660	1194	0.174	0.378	1.169	8.62e-20	1.91e-15	up	BCL2L10	BCL2 like 10 [Source:NCBI gene;Acc:395193]	-	-	-	-	GO:0005741//mitochondrial outer membrane;GO:0005886//plasma membrane;GO:0016020//membrane;GO:0016021//integral component of membrane	GO:0042803//protein homodimerization activity;GO:0046982//protein heterodimerization activity	GO:0006915//apoptotic process;GO:0008630//intrinsic apoptotic signaling pathway in response to DNA damage;GO:0042981//regulation of apoptotic process;GO:0097192//extrinsic apoptotic signaling pathway in absence of ligand
4	ENSGALG00000053765	3.56386	9.5181	660	1194	0.176	0.363	1.41723	8.35e-19	1.85e-14	up	-	parathymosin [Source:NCBI gene;Acc:418286]	-	-	-	-	-	-	-
4	ENSGALG00000033513	2.51948	6.14677	660	1194	0.111	0.284	1.2867	1.06e-18	2.35e-14	up	ELL	elongation factor for RNA polymerase II [Source:NCBI gene;Acc:420124]	-	-	-	-	GO:0008023//transcription elongation factor complex;GO:0015030//Cajal body;GO:0016607//nuclear speck;GO:0035327//transcriptionally active chromatin;GO:0035363//histone locus body	GO:0019902//phosphatase binding	GO:0006366//transcription by RNA polymerase II;GO:0006368//transcription elongation from RNA polymerase II promoter;GO:0010923//negative regulation of phosphatase activity;GO:0032968//positive regulation of transcription elongation from RNA polymerase II promoter;GO:0042795//snRNA transcription by RNA polymerase II;GO:0042796//snRNA transcription by RNA polymerase III;GO:0045945//positive regulat…
4	ENSGALG00000005512	3.7592	7.57151	660	1194	0.182	0.347	1.01015	9.66e-14	2.14e-09	up	KIAA1671	KIAA1671 [Source:NCBI gene;Acc:768701]	-	-	-	-	-	-	-
4	ENSGALG00000053682	9.48907	0.215069	660	1194	0.364	0.015	-5.46339	1.07e-100	2.38e-96	down	MHCIY	MHC-like class I Y [Source:NCBI gene;Acc:768350]	-	-	-	-	GO:0016020//membrane;GO:0016021//integral component of membrane	-	-
4	ENSGALG00000054766	23.7102	11.5181	660	1194	0.645	0.483	-1.04161	9.36e-43	2.08e-38	down	ITGA2B	integrin subunit alpha 2b [Source:NCBI gene;Acc:101749783]	Cellular Processes;Cellular Processes;Environmental Information Processing	Cell motility;Cellular community - eukaryotes;Signaling molecules and interaction	ko04810//Regulation of actin cytoskeleton;ko04510//Focal adhesion;ko04512//ECM-receptor interaction	K06476;K06476;K06476	GO:0005925//focal adhesion;GO:0008305//integrin complex;GO:0009897//external side of plasma membrane;GO:0009986//cell surface;GO:0070062//extracellular exosome	GO:0042802//identical protein binding;GO:0050840//extracellular matrix binding	GO:0007155//cell adhesion;GO:0007160//cell-matrix adhesion
4	ENSGALG00000041926	21.1495	9.96181	660	1194	0.614	0.401	-1.08615	8.86e-31	1.96e-26	down	HEXIM1	HEXIM P-TEFb complex subunit 1 [Source:HGNC Symbol;Acc:HGNC:24953]	-	-	-	-	GO:0005634//nucleus;GO:0005654//nucleoplasm;GO:0005737//cytoplasm	GO:0004861//cyclin-dependent protein serine/threonine kinase inhibitor activity;GO:0017069//snRNA binding;GO:0097322//7SK snRNA binding	GO:0000122//negative regulation of transcription by RNA polymerase II;GO:0002218//activation of innate immune response;GO:0007507//heart development;GO:0045736//negative regulation of cyclin-dependent protein serine/threonine kinase activity;GO:0045892//negative regulation of transcription, DNA-templated;GO:1901798//positive regulation of signal transduction by p53 class mediator
4	ENSGALG00000027069	14.8314	6.27878	660	1194	0.465	0.29	-1.2401	9.94e-28	2.2e-23	down	TSC22D3	TSC22 domain family member 3 [Source:NCBI gene;Acc:768091]	-	-	-	-	GO:0005634//nucleus	GO:0003700//DNA-binding transcription factor activity	GO:0006355//regulation of transcription, DNA-templated;GO:0006970//response to osmotic stress;GO:0070236//negative regulation of activation-induced cell death of T cells
4	ENSGALG00000014811	11.6919	4.55509	660	1194	0.374	0.225	-1.35996	5.75e-23	1.28e-18	down	SMCHD1	structural maintenance of chromosomes flexible hinge domain containing 1 [Source:NCBI gene;Acc:421057]	-	-	-	-	GO:0000784//nuclear chromosome, telomeric region;GO:0005694//chromosome;GO:0035861//site of double-strand break	GO:0005515//protein binding;GO:0005524//ATP binding;GO:0016887//ATPase activity;GO:0042803//protein homodimerization activity	GO:0006302//double-strand break repair;GO:0043584//nose development;GO:0045739//positive regulation of DNA repair;GO:0051276//chromosome organization;GO:0070868//heterochromatin organization involved in chromatin silencing;GO:2000042//negative regulation of double-strand break repair via homologous recombination;GO:2001034//positive regulation of double-strand break repair via nonhomologous end j…
4	ENSGALG00000030781	6.91024	2.75354	660	1194	0.268	0.152	-1.32745	1.57e-13	3.48e-09	down	CA2	carbonic anhydrase 2 [Source:NCBI gene;Acc:396257]	Metabolism	Energy metabolism	ko00910//Nitrogen metabolism	K18245	GO:0005623//cell;GO:0005737//cytoplasm;GO:0005829//cytosol;GO:0005886//plasma membrane;GO:0016020//membrane;GO:0043209//myelin sheath;GO:0045177//apical part of cell	GO:0004064//arylesterase activity;GO:0004089//carbonate dehydratase activity;GO:0008270//zinc ion binding;GO:0016829//lyase activity;GO:0046872//metal ion binding	GO:0002009//morphogenesis of an epithelium;GO:0015670//carbon dioxide transport;GO:0032230//positive regulation of synaptic transmission, GABAergic;GO:0032849//positive regulation of cellular pH reduction;GO:0038166//angiotensin-activated signaling pathway;GO:0044070//regulation of anion transport;GO:0046903//secretion;GO:0051453//regulation of intracellular pH;GO:0071244//cellular response to ca…

## Sheet: Cluster 5
Cluster	GeneID	control	ALV-J	cells.1	cells.2	pct.1	pct.2	log2FC	p_value	p_val_adjust	significance	Symbol	Description	KEGG_A_class	KEGG_B_class	Pathway	K_ID	GO Component	GO Function	GO Process
5	ENSGALG00000038671	4.91256	16.3122	911	574	0.195	0.497	1.73141	1.23e-37	2.73e-33	up	-	uncharacterized LOC422090 [Source:NCBI gene;Acc:422090]	-	-	-	-	-	-	-
5	ENSGALG00000052801	3.17844	10.0553	911	574	0.132	0.373	1.66157	2.4e-26	5.32e-22	up	-	-	-	-	-	-	-	-	-
5	ENSGALG00000043329	4.11587	9.9522	911	574	0.149	0.319	1.27382	1.11e-13	2.46e-09	up	-	prothymosin alpha [Source:NCBI gene;Acc:424931]	-	-	-	-	-	-	-
5	ENSGALG00000030871	3.26374	7.60836	911	574	0.134	0.282	1.22106	1.28e-11	2.83e-07	up	BCL2L10	BCL2 like 10 [Source:NCBI gene;Acc:395193]	-	-	-	-	GO:0005741//mitochondrial outer membrane;GO:0005886//plasma membrane;GO:0016020//membrane;GO:0016021//integral component of membrane	GO:0042803//protein homodimerization activity;GO:0046982//protein heterodimerization activity	GO:0006915//apoptotic process;GO:0008630//intrinsic apoptotic signaling pathway in response to DNA damage;GO:0042981//regulation of apoptotic process;GO:0097192//extrinsic apoptotic signaling pathway in absence of ligand
5	ENSGALG00000004310	3.57673	7.67649	911	574	0.153	0.305	1.10181	1.39e-11	3.08e-07	up	TTYH3	tweety family member 3 [Source:NCBI gene;Acc:416470]	-	-	-	-	GO:0005886//plasma membrane;GO:0016020//membrane;GO:0016021//integral component of membrane;GO:0034707//chloride channel complex	GO:0005229//intracellular calcium activated chloride channel activity;GO:0005254//chloride channel activity;GO:0072320//volume-sensitive chloride channel activity	GO:0006811//ion transport;GO:0006821//chloride transport;GO:0034220//ion transmembrane transport;GO:1902476//chloride transmembrane transport
5	ENSGALG00000053765	4.46248	9.64837	911	574	0.155	0.305	1.11244	3.46e-11	7.68e-07	up	-	parathymosin [Source:NCBI gene;Acc:418286]	-	-	-	-	-	-	-
5	ENSGALG00000053682	7.68611	0.292399	911	574	0.297	0.014	-4.71624	1.87e-53	4.14e-49	down	MHCIY	MHC-like class I Y [Source:NCBI gene;Acc:768350]	-	-	-	-	GO:0016020//membrane;GO:0016021//integral component of membrane	-	-
5	ENSGALG00000054766	22.9782	9.44423	911	574	0.6	0.354	-1.28276	2.44e-32	5.4e-28	down	ITGA2B	integrin subunit alpha 2b [Source:NCBI gene;Acc:101749783]	Cellular Processes;Cellular Processes;Environmental Information Processing	Cell motility;Cellular community - eukaryotes;Signaling molecules and interaction	ko04810//Regulation of actin cytoskeleton;ko04510//Focal adhesion;ko04512//ECM-receptor interaction	K06476;K06476;K06476	GO:0005925//focal adhesion;GO:0008305//integrin complex;GO:0009897//external side of plasma membrane;GO:0009986//cell surface;GO:0070062//extracellular exosome	GO:0042802//identical protein binding;GO:0050840//extracellular matrix binding	GO:0007155//cell adhesion;GO:0007160//cell-matrix adhesion
5	ENSGALG00000039264	14.1898	6.68205	911	574	0.449	0.267	-1.0865	2.65e-16	5.87e-12	down	SLA	Src like adaptor [Source:NCBI gene;Acc:378908]	-	-	-	-	-	GO:0004715//non-membrane spanning protein tyrosine kinase activity;GO:0005070//SH3/SH2 adaptor activity;GO:0005515//protein binding	GO:0009966//regulation of signal transduction;GO:0009967//positive regulation of signal transduction;GO:0030154//cell differentiation;GO:0038083//peptidyl-tyrosine autophosphorylation;GO:0042127//regulation of cell proliferation

## Sheet: Cluster 6
Cluster	GeneID	control	ALV-J	cells.1	cells.2	pct.1	pct.2	log2FC	p_value	p_val_adjust	significance	Symbol	Description	KEGG_A_class	KEGG_B_class	Pathway	K_ID	GO Component	GO Function	GO Process
6	ENSGALG00000011094	0.796338	4.01662	653	77	0.112	0.325	2.33453	1.18e-09	2.62e-05	up	PDE4B	phosphodiesterase 4B [Source:NCBI gene;Acc:424700]	Metabolism	Nucleotide metabolism	ko00230//Purine metabolism	K13293	GO:0005829//cytosol	GO:0004114//3',5'-cyclic-nucleotide phosphodiesterase activity;GO:0004115//3',5'-cyclic-AMP phosphodiesterase activity;GO:0005515//protein binding;GO:0008081//phosphoric diester hydrolase activity;GO:0016787//hydrolase activity;GO:0030552//cAMP binding;GO:0044325//ion channel binding;GO:0046872//metal ion binding	GO:0007165//signal transduction
6	ENSGALG00000014922	1.78446	8.39011	653	77	0.227	0.481	2.2332	2.34e-16	5.19e-12	up	ROCK1	Rho-associated, coiled-coil containing protein kinase 1 [Source:NCBI gene;Acc:373970]	Cellular Processes;Cellular Processes;Cellular Processes;Organismal Systems;Environmental Information Processing;Human Diseases	Cell motility;Cellular community - eukaryotes;Cellular community - eukaryotes;Circulatory system;Signal transduction;Infectious diseases	ko04810//Regulation of actin cytoskeleton;ko04510//Focal adhesion;ko04530//Tight junction;ko04270//Vascular smooth muscle contraction;ko04350//TGF-beta signaling pathway;ko05132//Salmonella infection	K04514;K04514;K04514;K04514;K04514;K04514	GO:0001726//ruffle;GO:0005856//cytoskeleton;GO:0005886//plasma membrane;GO:0010494//cytoplasmic stress granule;GO:0030027//lamellipodium;GO:0106003//amyloid-beta complex	GO:0000166//nucleotide binding;GO:0004672//protein kinase activity;GO:0004674//protein serine/threonine kinase activity;GO:0005524//ATP binding;GO:0016301//kinase activity;GO:0016740//transferase activity;GO:0017048//Rho GTPase binding;GO:0017049//GTP-Rho binding;GO:0046872//metal ion binding;GO:0072518//Rho-dependent protein serine/threonine kinase activity	GO:0003383//apical constriction;GO:0006468//protein phosphorylation;GO:0007159//leukocyte cell-cell adhesion;GO:0007249//I-kappaB kinase/NF-kappaB signaling;GO:0007266//Rho protein signal transduction;GO:0010508//positive regulation of autophagy;GO:0010613//positive regulation of cardiac muscle hypertrophy;GO:0010628//positive regulation of gene expression;GO:0016310//phosphorylation;GO:0016525//…
6	ENSGALG00000008903	0.860282	3.7582	653	77	0.1	0.273	2.12716	1.77e-06	0.0391838	up	ITPRID2	ITPR interacting domain containing 2 [Source:NCBI gene;Acc:424118]	-	-	-	-	GO:0005634//nucleus;GO:0005829//cytosol;GO:0005886//plasma membrane	GO:0003779//actin binding;GO:0005102//signaling receptor binding;GO:0051015//actin filament binding	-
6	ENSGALG00000014412	3.27919	14.0547	653	77	0.191	0.403	2.09964	4.11e-09	9.11e-05	up	CSTA	cystatin A [Source:NCBI gene;Acc:418268]	-	-	-	-	GO:0001533//cornified envelope;GO:0005615//extracellular space;GO:0005622//intracellular;GO:0005634//nucleus;GO:0005737//cytoplasm;GO:0005829//cytosol	GO:0002020//protease binding;GO:0004866//endopeptidase inhibitor activity;GO:0004869//cysteine-type endopeptidase inhibitor activity;GO:0005198//structural molecule activity;GO:0030674//protein binding, bridging	GO:0010466//negative regulation of peptidase activity;GO:0010951//negative regulation of endopeptidase activity;GO:0018149//peptide cross-linking;GO:0030216//keratinocyte differentiation;GO:0045861//negative regulation of proteolysis;GO:0098609//cell-cell adhesion
6	ENSGALG00000037913	1.3278	5.52111	653	77	0.165	0.351	2.05592	8.89e-11	1.97e-06	up	KLF10	Kruppel-like factor 10 [Source:NCBI gene;Acc:420255]	-	-	-	-	GO:0005634//nucleus	GO:0000978//RNA polymerase II proximal promoter sequence-specific DNA binding;GO:0000981//DNA-binding transcription factor activity, RNA polymerase II-specific;GO:0001046//core promoter sequence-specific DNA binding;GO:0001228//DNA-binding transcription activator activity, RNA polymerase II-specific;GO:0003676//nucleic acid binding	GO:0006355//regulation of transcription, DNA-templated;GO:0006357//regulation of transcription by RNA polymerase II;GO:0007623//circadian rhythm;GO:0009267//cellular response to starvation;GO:0030282//bone mineralization;GO:0035019//somatic stem cell population maintenance;GO:0045672//positive regulation of osteoclast differentiation;GO:0045892//negative regulation of transcription, DNA-templated…
6	ENSGALG00000002655	1.06033	4.35332	653	77	0.116	0.312	2.0376	2.53e-07	0.00559806	up	ITGAV	integrin subunit alpha V [Source:NCBI gene;Acc:396420]	Cellular Processes;Cellular Processes;Cellular Processes;Environmental Information Processing;Environmental Information Processing	Cell motility;Cellular community - eukaryotes;Transport and catabolism;Signaling molecules and interaction;Signaling molecules and interaction	ko04810//Regulation of actin cytoskeleton;ko04510//Focal adhesion;ko04145//Phagosome;ko04514//Cell adhesion molecules (CAMs);ko04512//ECM-receptor interaction	K06487;K06487;K06487;K06487;K06487	GO:0005829//cytosol;GO:0005886//plasma membrane;GO:0005925//focal adhesion;GO:0008305//integrin complex;GO:0009897//external side of plasma membrane;GO:0009986//cell surface;GO:0016020//membrane;GO:0016021//integral component of membrane;GO:0031258//lamellipodium membrane;GO:0031527//filopodium membrane;GO:0031528//microvillus membrane;GO:0032587//ruffle membrane;GO:0034683//integrin alphav-beta3…	GO:0001846//opsonin binding;GO:0001968//fibronectin binding;GO:0002020//protease binding;GO:0005080//protein kinase C binding;GO:0005178//integrin binding;GO:0005245//voltage-gated calcium channel activity;GO:0017134//fibroblast growth factor binding;GO:0019960//C-X3-C chemokine binding;GO:0031994//insulin-like growth factor I binding;GO:0038132//neuregulin binding;GO:0050840//extracellular matri…	GO:0001525//angiogenesis;GO:0001568//blood vessel development;GO:0007155//cell adhesion;GO:0007160//cell-matrix adhesion;GO:0007229//integrin-mediated signaling pathway;GO:0008284//positive regulation of cell proliferation;GO:0010745//negative regulation of macrophage derived foam cell differentiation;GO:0010888//negative regulation of lipid storage;GO:0030335//positive regulation of cell migrati…
6	ENSGALG00000027983	0.741008	2.84673	653	77	0.107	0.26	1.94175	2.2e-07	0.00487203	up	-	tyrosine kinase non receptor 2 [Source:NCBI gene;Acc:431014]	-	-	-	-	-	GO:0004672//protein kinase activity;GO:0004713//protein tyrosine kinase activity;GO:0004715//non-membrane spanning protein tyrosine kinase activity;GO:0005515//protein binding;GO:0005524//ATP binding	GO:0006468//protein phosphorylation;GO:0030154//cell differentiation;GO:0038083//peptidyl-tyrosine autophosphorylation;GO:0042127//regulation of cell proliferation
6	ENSGALG00000040426	1.74624	6.38049	653	77	0.204	0.364	1.86942	2.17e-10	4.82e-06	up	CREG1	cellular repressor of E1A stimulated genes 1 [Source:NCBI gene;Acc:768680]	-	-	-	-	GO:0005576//extracellular region;GO:0005615//extracellular space;GO:0005667//transcription factor complex	GO:0008134//transcription factor binding;GO:0048037//cofactor binding	GO:0006355//regulation of transcription, DNA-templated;GO:0040008//regulation of growth
6	ENSGALG00000013575	5.24838	18.2255	653	77	0.271	0.39	1.79602	9.43e-08	0.00209063	up	IFI6	interferon alpha inducible protein 6 [Source:NCBI gene;Acc:403120]	-	-	-	-	GO:0005739//mitochondrion;GO:0016021//integral component of membrane	-	-
6	ENSGALG00000038494	3.11718	10.7886	653	77	0.343	0.636	1.7912	2.35e-17	5.2e-13	up	CMIP	c-Maf inducing protein [Source:NCBI gene;Acc:425774]	-	-	-	-	GO:0005654//nucleoplasm;GO:0005829//cytosol	-	-
6	ENSGALG00000005569	0.895735	3.09267	653	77	0.141	0.273	1.78771	2.06e-11	4.57e-07	up	USP47	ubiquitin specific peptidase 47 [Source:NCBI gene;Acc:423032]	-	-	-	-	GO:0005737//cytoplasm;GO:0019005//SCF ubiquitin ligase complex	GO:0004843//thiol-dependent ubiquitin-specific protease activity;GO:0005515//protein binding;GO:0036459//thiol-dependent ubiquitinyl hydrolase activity;GO:0071987//WD40-repeat domain binding;GO:0101005//ubiquitinyl hydrolase activity	GO:0006284//base-excision repair;GO:0006511//ubiquitin-dependent protein catabolic process;GO:0006974//cellular response to DNA damage stimulus;GO:0010972//negative regulation of G2/M transition of mitotic cell cycle;GO:0016579//protein deubiquitination;GO:0030307//positive regulation of cell growth;GO:0034644//cellular response to UV;GO:0035520//monoubiquitinated protein deubiquitination;GO:0042…
6	ENSGALG00000023296	1.23171	4.09892	653	77	0.13	0.364	1.73458	1.47e-06	0.0326669	up	TAL1	TAL bHLH transcription factor 1, erythroid differentiation factor [Source:NCBI gene;Acc:396298]	-	-	-	-	GO:0000118//histone deacetylase complex;GO:0000790//nuclear chromatin;GO:0005634//nucleus;GO:0005654//nucleoplasm;GO:0005667//transcription factor complex;GO:0032991//protein-containing complex;GO:0033193//Lsd1/2 complex	GO:0000976//transcription regulatory region sequence-specific DNA binding;GO:0000978//RNA polymerase II proximal promoter sequence-specific DNA binding;GO:0000980//RNA polymerase II distal enhancer sequence-specific DNA binding;GO:0000981//DNA-binding transcription factor activity, RNA polymerase II-specific;GO:0001085//RNA polymerase II transcription factor binding;GO:0003677//DNA binding;GO:000…	GO:0000122//negative regulation of transcription by RNA polymerase II;GO:0001525//angiogenesis;GO:0006357//regulation of transcription by RNA polymerase II;GO:0006366//transcription by RNA polymerase II;GO:0007626//locomotory behavior;GO:0021527//spinal cord association neuron differentiation;GO:0030097//hemopoiesis;GO:0030099//myeloid cell differentiation;GO:0030182//neuron differentiation;GO:00…
6	ENSGALG00000029709	1.66652	5.49751	653	77	0.227	0.377	1.72194	2.93e-09	6.49e-05	up	INPP4A	inositol polyphosphate-4-phosphatase type I A [Source:NCBI gene;Acc:418690]	Metabolism;Environmental Information Processing;Metabolism	Global and overview maps;Signal transduction;Carbohydrate metabolism	ko01100//Metabolic pathways;ko04070//Phosphatidylinositol signaling system;ko00562//Inositol phosphate metabolism	K01109;K01109;K01109	GO:0005737//cytoplasm	GO:0016316//phosphatidylinositol-3,4-bisphosphate 4-phosphatase activity	GO:0036092//phosphatidylinositol-3-phosphate biosynthetic process
6	ENSGALG00000046729	5.04943	16.6479	653	77	0.322	0.494	1.72115	5.84e-11	1.3e-06	up	-	macrophage mannose receptor 1-like [Source:NCBI gene;Acc:107049166]	-	-	-	-	-	-	-
6	ENSGALG00000039575	0.970989	3.13142	653	77	0.124	0.286	1.68929	9.26e-06	0.205333	up	AMD1	adenosylmethionine decarboxylase 1 [Source:NCBI gene;Acc:421755]	Metabolism;Metabolism;Metabolism	Global and overview maps;Amino acid metabolism;Amino acid metabolism	ko01100//Metabolic pathways;ko00330//Arginine and proline metabolism;ko00270//Cysteine and methionine metabolism	K01611;K01611;K01611	GO:0005829//cytosol	GO:0004014//adenosylmethionine decarboxylase activity;GO:0016829//lyase activity;GO:0016831//carboxy-lyase activity	GO:0006557//S-adenosylmethioninamine biosynthetic process;GO:0006596//polyamine biosynthetic process;GO:0006597//spermine biosynthetic process;GO:0008295//spermidine biosynthetic process
6	ENSGALG00000003748	1.27675	4.11338	653	77	0.179	0.312	1.68785	6.94e-09	0.000153939	up	ANO5	anoctamin 5 [Source:NCBI gene;Acc:422973]	-	-	-	-	GO:0005886//plasma membrane;GO:0016020//membrane;GO:0016021//integral component of membrane;GO:0031982//vesicle	GO:0005229//intracellular calcium activated chloride channel activity;GO:0046983//protein dimerization activity	GO:0006821//chloride transport;GO:0034220//ion transmembrane transport
6	ENSGALG00000004324	1.06128	3.33835	653	77	0.132	0.273	1.65333	4.5e-06	0.0997182	up	SETD1B	SET domain containing 1B [Source:NCBI gene;Acc:416851]	Metabolism	Amino acid metabolism	ko00310//Lysine degradation	K11422	GO:0005634//nucleus;GO:0005654//nucleoplasm;GO:0005829//cytosol;GO:0035097//histone methyltransferase complex;GO:0048188//Set1C/COMPASS complex	GO:0003676//nucleic acid binding;GO:0003723//RNA binding;GO:0005515//protein binding;GO:0008168//methyltransferase activity;GO:0016740//transferase activity;GO:0018024//histone-lysine N-methyltransferase activity;GO:0042800//histone methyltransferase activity (H3-K4 specific)	GO:0032259//methylation;GO:0051568//histone H3-K4 methylation
6	ENSGALG00000031425	2.18382	6.68032	653	77	0.182	0.377	1.61307	5.69e-06	0.126149	up	PMP22	peripheral myelin protein 22 [Source:NCBI gene;Acc:417327]	-	-	-	-	GO:0005886//plasma membrane;GO:0016020//membrane;GO:0016021//integral component of membrane	-	GO:0008219//cell death;GO:0032060//bleb assembly;GO:0032288//myelin assembly;GO:0042552//myelination
6	ENSGALG00000025842	3.91943	11.9741	653	77	0.245	0.403	1.61121	7.56e-07	0.0167645	up	BRT-1	tropomyosin 2 [Source:NCBI gene;Acc:396430]	Organismal Systems;Organismal Systems	Circulatory system;Circulatory system	ko04261//Adrenergic signaling in cardiomyocytes;ko04260//Cardiac muscle contraction	K09290;K09290	GO:0005737//cytoplasm;GO:0005856//cytoskeleton;GO:0005884//actin filament;GO:0015629//actin cytoskeleton	GO:0003779//actin binding;GO:0005515//protein binding;GO:0008092//cytoskeletal protein binding;GO:0042802//identical protein binding;GO:0042803//protein homodimerization activity;GO:0046982//protein heterodimerization activity;GO:0051015//actin filament binding	GO:0007015//actin filament organization;GO:0043462//regulation of ATPase activity
6	ENSGALG00000012702	4.23896	12.6277	653	77	0.479	0.662	1.57481	4.77e-22	1.06e-17	up	JARID2	jumonji and AT-rich interaction domain containing 2 [Source:NCBI gene;Acc:420839]	-	-	-	-	GO:0005634//nucleus;GO:0005739//mitochondrion;GO:0035097//histone methyltransferase complex;GO:0035098//ESC/E(Z) complex	GO:0000977//RNA polymerase II regulatory region sequence-specific DNA binding;GO:0001227//DNA-binding transcription repressor activity, RNA polymerase II-specific;GO:0003677//DNA binding;GO:0003682//chromatin binding;GO:0008134//transcription factor binding;GO:0032452//histone demethylase activity	GO:0000122//negative regulation of transcription by RNA polymerase II;GO:0001889//liver development;GO:0006338//chromatin remodeling;GO:0008285//negative regulation of cell proliferation;GO:0016577//histone demethylation;GO:0031061//negative regulation of histone methylation;GO:0034721//histone H3-K4 demethylation, trimethyl-H3-K4-specific;GO:0042127//regulation of cell proliferation;GO:0045892//…
6	ENSGALG00000001161	0.983313	2.92698	653	77	0.136	0.26	1.57369	1.08e-06	0.0240374	up	FLI1	Fli-1 proto-oncogene, ETS transcription factor [Source:NCBI gene;Acc:419723]	-	-	-	-	GO:0005634//nucleus;GO:0005829//cytosol;GO:0016604//nuclear body	GO:0000978//RNA polymerase II proximal promoter sequence-specific DNA binding;GO:0000980//RNA polymerase II distal enhancer sequence-specific DNA binding;GO:0000981//DNA-binding transcription factor activity, RNA polymerase II-specific;GO:0001228//DNA-binding transcription activator activity, RNA polymerase II-specific;GO:0003677//DNA binding;GO:0003682//chromatin binding;GO:0003700//DNA-binding …	GO:0006355//regulation of transcription, DNA-templated;GO:0006357//regulation of transcription by RNA polymerase II;GO:0008015//blood circulation;GO:0009887//animal organ morphogenesis;GO:0030154//cell differentiation;GO:0035855//megakaryocyte development;GO:0045893//positive regulation of transcription, DNA-templated;GO:0045944//positive regulation of transcription by RNA polymerase II
6	ENSGALG00000015170	1.10069	3.25571	653	77	0.155	0.26	1.56457	1.02e-06	0.0226957	up	VPS13A	vacuolar protein sorting 13 homolog A [Source:NCBI gene;Acc:427050]	-	-	-	-	GO:0019898//extrinsic component of membrane;GO:0031045//dense core granule	-	GO:0006623//protein targeting to vacuole;GO:0006914//autophagy;GO:0007399//nervous system development;GO:0007626//locomotory behavior;GO:0035176//social behavior;GO:0045053//protein retention in Golgi apparatus
6	ENSGALG00000026077	1.65818	4.89623	653	77	0.205	0.39	1.56207	1.52e-08	0.000337775	up	ALDOC	aldolase, fructose-bisphosphate C [Source:NCBI gene;Acc:395492]	Metabolism;Metabolism;Metabolism;Metabolism;Metabolism;Metabolism	Global and overview maps;Global and overview maps;Global and overview maps;Carbohydrate metabolism;Carbohydrate metabolism;Carbohydrate metabolism	ko01100//Metabolic pathways;ko01200//Carbon metabolism;ko01230//Biosynthesis of amino acids;ko00010//Glycolysis / Gluconeogenesis;ko00051//Fructose and mannose metabolism;ko00030//Pentose phosphate pathway	K01623;K01623;K01623;K01623;K01623;K01623	-	GO:0003824//catalytic activity;GO:0004332//fructose-bisphosphate aldolase activity;GO:0008092//cytoskeletal protein binding;GO:0016829//lyase activity	GO:0006096//glycolytic process;GO:0030388//fructose 1,6-bisphosphate metabolic process;GO:0030855//epithelial cell differentiation
6	ENSGALG00000033513	2.3035	6.74382	653	77	0.274	0.429	1.54974	2.44e-13	5.4e-09	up	ELL	elongation factor for RNA polymerase II [Source:NCBI gene;Acc:420124]	-	-	-	-	GO:0008023//transcription elongation factor complex;GO:0015030//Cajal body;GO:0016607//nuclear speck;GO:0035327//transcriptionally active chromatin;GO:0035363//histone locus body	GO:0019902//phosphatase binding	GO:0006366//transcription by RNA polymerase II;GO:0006368//transcription elongation from RNA polymerase II promoter;GO:0010923//negative regulation of phosphatase activity;GO:0032968//positive regulation of transcription elongation from RNA polymerase II promoter;GO:0042795//snRNA transcription by RNA polymerase II;GO:0042796//snRNA transcription by RNA polymerase III;GO:0045945//positive regulat…
6	ENSGALG00000010649	1.55897	4.54037	653	77	0.184	0.286	1.54221	5.29e-07	0.0117174	up	CNST	consortin, connexin sorting protein [Source:NCBI gene;Acc:421487]	-	-	-	-	GO:0005802//trans-Golgi network;GO:0005886//plasma membrane;GO:0030133//transport vesicle;GO:0032991//protein-containing complex;GO:0043231//intracellular membrane-bounded organelle	GO:0019902//phosphatase binding;GO:0071253//connexin binding	GO:0010923//negative regulation of phosphatase activity;GO:0042998//positive regulation of Golgi to plasma membrane protein transport
6	ENSGALG00000005668	1.19927	3.43425	653	77	0.173	0.286	1.51784	3.98e-08	0.000882385	up	WSB1	WD repeat and SOCS box containing 1 [Source:NCBI gene;Acc:395685]	-	-	-	-	GO:0005575//cellular_component	GO:0003674//molecular_function;GO:0005515//protein binding	GO:0008150//biological_process;GO:0016567//protein ubiquitination;GO:0035556//intracellular signal transduction
6	ENSGALG00000002594	1.5848	4.51431	653	77	0.155	0.338	1.51021	8.71e-05	1	up	TFPI	tissue factor pathway inhibitor [Source:NCBI gene;Acc:423989]	-	-	-	-	GO:0005576//extracellular region;GO:0005615//extracellular space;GO:0005901//caveola;GO:0009986//cell surface	GO:0004867//serine-type endopeptidase inhibitor activity;GO:0030414//peptidase inhibitor activity	GO:0010466//negative regulation of peptidase activity;GO:0010951//negative regulation of endopeptidase activity;GO:0030195//negative regulation of blood coagulation;GO:0071383//cellular response to steroid hormone stimulus
6	ENSGALG00000016443	2.64146	7.45656	653	77	0.305	0.481	1.49718	2.14e-10	4.74e-06	up	HPCAL1	hippocalcin like 1 [Source:NCBI gene;Acc:396161]	-	-	-	-	-	GO:0005509//calcium ion binding;GO:0005515//protein binding;GO:0046872//metal ion binding	-
6	ENSGALG00000013640	2.24967	6.2995	653	77	0.27	0.403	1.48553	7.72e-10	1.71e-05	up	MBP	myelin basic protein [Source:NCBI gene;Acc:396217]	-	-	-	-	GO:0005886//plasma membrane;GO:0016020//membrane;GO:0032991//protein-containing complex;GO:0033269//internode region of axon;GO:0042995//cell projection;GO:0043025//neuronal cell body;GO:0043209//myelin sheath;GO:0043218//compact myelin;GO:0071944//cell periphery	GO:0002020//protease binding;GO:0005516//calmodulin binding;GO:0019911//structural constituent of myelin sheath	GO:0007605//sensory perception of sound;GO:0009636//response to toxic substance;GO:0042552//myelination;GO:0061024//membrane organization
6	ENSGALG00000041454	1.52945	4.18882	653	77	0.199	0.286	1.45353	1e-07	0.00221987	up	Dnmt3a	DNA methyltransferase 3 alpha [Source:NCBI gene;Acc:421991]	Metabolism;Metabolism	Global and overview maps;Amino acid metabolism	ko01100//Metabolic pathways;ko00270//Cysteine and methionine metabolism	K17398;K17398	GO:0000775//chromosome, centromeric region;GO:0000791//euchromatin;GO:0000792//heterochromatin;GO:0005634//nucleus;GO:0005654//nucleoplasm;GO:0005720//nuclear heterochromatin;GO:0005737//cytoplasm;GO:0016363//nuclear matrix	GO:0000978//RNA polymerase II proximal promoter sequence-specific DNA binding;GO:0003677//DNA binding;GO:0003682//chromatin binding;GO:0003886//DNA (cytosine-5-)-methyltransferase activity;GO:0008134//transcription factor binding;GO:0008168//methyltransferase activity;GO:0009008//DNA-methyltransferase activity;GO:0016740//transferase activity;GO:0042802//identical protein binding	GO:0000122//negative regulation of transcription by RNA polymerase II;GO:0006306//DNA methylation;GO:0006346//methylation-dependent chromatin silencing;GO:0006349//regulation of gene expression by genetic imprinting;GO:0007283//spermatogenesis;GO:0010468//regulation of gene expression;GO:0032259//methylation;GO:0043045//DNA methylation involved in embryo development;GO:0043046//DNA methylation in…
6	ENSGALG00000009927	1.47112	3.98722	653	77	0.193	0.286	1.43847	2.5e-08	0.000553471	up	RAP1B	RAP1B, member of RAS oncogene family [Source:NCBI gene;Acc:417840]	Environmental Information Processing;Cellular Processes	Signal transduction;Cellular community - eukaryotes	ko04010//MAPK signaling pathway;ko04510//Focal adhesion	K07836;K07836	GO:0005737//cytoplasm;GO:0005811//lipid droplet;GO:0005829//cytosol;GO:0005886//plasma membrane;GO:0005911//cell-cell junction;GO:0016020//membrane;GO:0030054//cell junction	GO:0000166//nucleotide binding;GO:0003924//GTPase activity;GO:0005525//GTP binding;GO:0019003//GDP binding;GO:0044877//protein-containing complex binding	GO:0007165//signal transduction;GO:0007264//small GTPase mediated signal transduction;GO:0008283//cell proliferation;GO:0032486//Rap protein signal transduction;GO:0045955//negative regulation of calcium ion-dependent exocytosis;GO:0061028//establishment of endothelial barrier;GO:0070374//positive regulation of ERK1 and ERK2 cascade;GO:0071320//cellular response to cAMP;GO:1901888//regulation of …
6	ENSGALG00000001725	1.36424	3.68632	653	77	0.184	0.299	1.43409	1.49e-06	0.0330081	up	TNRC6C	trinucleotide repeat containing 6C [Source:NCBI gene;Acc:417348]	-	-	-	-	GO:0000932//P-body;GO:0005654//nucleoplasm;GO:0035068//micro-ribonucleoprotein complex	GO:0003676//nucleic acid binding;GO:0005515//protein binding	GO:0035195//gene silencing by miRNA;GO:0035278//miRNA mediated inhibition of translation;GO:0060213//positive regulation of nuclear-transcribed mRNA poly(A) tail shortening;GO:1900153//positive regulation of nuclear-transcribed mRNA catabolic process, deadenylation-dependent decay
6	ENSGALG00000014638	1.20171	3.23267	653	77	0.162	0.26	1.42764	8.92e-07	0.0197749	up	ASH1L	ASH1 like histone lysine methyltransferase [Source:NCBI gene;Acc:425064]	Metabolism	Amino acid metabolism	ko00310//Lysine degradation	K06101	GO:0005634//nucleus;GO:0005654//nucleoplasm;GO:0005794//Golgi apparatus	GO:0003677//DNA binding;GO:0003682//chromatin binding;GO:0005515//protein binding;GO:0008168//methyltransferase activity;GO:0016740//transferase activity;GO:0018024//histone-lysine N-methyltransferase activity;GO:0042800//histone methyltransferase activity (H3-K4 specific);GO:0046872//metal ion binding;GO:0046974//histone methyltransferase activity (H3-K9 specific);GO:0046975//histone methyltrans…	GO:0001501//skeletal system development;GO:0002674//negative regulation of acute inflammatory response;GO:0007338//single fertilization;GO:0009791//post-embryonic development;GO:0010468//regulation of gene expression;GO:0030317//flagellated sperm motility;GO:0032259//methylation;GO:0032635//interleukin-6 production;GO:0043124//negative regulation of I-kappaB kinase/NF-kappaB signaling;GO:0043409/…
6	ENSGALG00000015259	0.996591	2.67192	653	77	0.132	0.26	1.4228	0.000171965	1	up	RB1CC1	RB1 inducible coiled-coil 1 [Source:NCBI gene;Acc:421116]	Cellular Processes	Transport and catabolism	ko04140//Autophagy - animal	K17589	GO:0000407//phagophore assembly site;GO:0005634//nucleus;GO:0005764//lysosome;GO:0005829//cytosol;GO:0019898//extrinsic component of membrane;GO:0031965//nuclear membrane;GO:0034045//phagophore assembly site membrane;GO:1990316//Atg1/ULK1 kinase complex	GO:0019901//protein kinase binding;GO:0032947//protein-containing complex scaffold activity	GO:0000045//autophagosome assembly;GO:0000422//autophagy of mitochondrion;GO:0001889//liver development;GO:0001934//positive regulation of protein phosphorylation;GO:0006914//autophagy;GO:0007507//heart development;GO:0030242//autophagy of peroxisome;GO:0034727//piecemeal microautophagy of the nucleus;GO:0043066//negative regulation of apoptotic process;GO:0045793//positive regulation of cell siz…
6	ENSGALG00000031448	1.35335	3.62672	653	77	0.19	0.338	1.42212	7.78e-08	0.00172489	up	MAPK6	mitogen-activated protein kinase 6 [Source:NCBI gene;Acc:415419]	-	-	-	-	GO:0005634//nucleus;GO:0005737//cytoplasm;GO:0005829//cytosol;GO:0032156//septin cytoskeleton;GO:0032991//protein-containing complex	GO:0000166//nucleotide binding;GO:0004672//protein kinase activity;GO:0004674//protein serine/threonine kinase activity;GO:0004707//MAP kinase activity;GO:0005524//ATP binding;GO:0016301//kinase activity;GO:0016740//transferase activity;GO:0019901//protein kinase binding;GO:0046982//protein heterodimerization activity	GO:0000165//MAPK cascade;GO:0006468//protein phosphorylation;GO:0007049//cell cycle;GO:0010468//regulation of gene expression;GO:0016310//phosphorylation;GO:0035556//intracellular signal transduction;GO:0060999//positive regulation of dendritic spine development;GO:0071310//cellular response to organic substance
6	ENSGALG00000015611	1.25127	3.35205	653	77	0.155	0.325	1.42165	4.03e-05	0.894315	up	CASP8AP2	caspase 8 associated protein 2 [Source:NCBI gene;Acc:421810]	-	-	-	-	-	GO:0002020//protease binding;GO:0003677//DNA binding;GO:0008656//cysteine-type endopeptidase activator activity involved in apoptotic process;GO:0042802//identical protein binding	GO:0006919//activation of cysteine-type endopeptidase activity involved in apoptotic process;GO:0008625//extrinsic apoptotic signaling pathway via death domain receptors;GO:0097190//apoptotic signaling pathway
6	ENSGALG00000001382	1.22565	3.21096	653	77	0.165	0.312	1.38946	2.25e-05	0.498866	up	CDK11A	cyclin dependent kinase 11A [Source:NCBI gene;Acc:419406]	-	-	-	-	GO:0005634//nucleus	GO:0004672//protein kinase activity;GO:0004693//cyclin-dependent protein serine/threonine kinase activity;GO:0005524//ATP binding	GO:0006468//protein phosphorylation;GO:0007088//regulation of mitotic nuclear division;GO:2001234//negative regulation of apoptotic signaling pathway
6	ENSGALG00000006446	2.39521	6.06072	653	77	0.286	0.416	1.33934	1.48e-07	0.00328742	up	NAP1L4	nucleosome assembly protein 1 like 4 [Source:NCBI gene;Acc:423087]	-	-	-	-	GO:0005634//nucleus;GO:0005737//cytoplasm	GO:0031491//nucleosome binding	GO:0006334//nucleosome assembly
6	ENSGALG00000001907	2.01346	4.89319	653	77	0.257	0.39	1.2811	7.51e-09	0.000166364	up	WAPL	WAPL cohesin release factor [Source:NCBI gene;Acc:423608]	-	-	-	-	GO:0000785//chromatin;GO:0000795//synaptonemal complex;GO:0005634//nucleus;GO:0005737//cytoplasm;GO:0008278//cohesin complex	-	GO:0000278//mitotic cell cycle;GO:0008156//negative regulation of DNA replication;GO:0009636//response to toxic substance;GO:0035562//negative regulation of chromatin binding;GO:0045132//meiotic chromosome segregation;GO:0045875//negative regulation of sister chromatid cohesion;GO:0048146//positive regulation of fibroblast proliferation;GO:0051983//regulation of chromosome segregation;GO:0060623/…
6	ENSGALG00000007447	2.70466	6.56715	653	77	0.198	0.351	1.27982	0.00135908	1	up	TUBB1	tubulin beta 1 class VI [Source:NCBI gene;Acc:396427]	Cellular Processes;Cellular Processes	Transport and catabolism;Cellular community - eukaryotes	ko04145//Phagosome;ko04540//Gap junction	K07375;K07375	GO:0005737//cytoplasm;GO:0005856//cytoskeleton;GO:0005874//microtubule	GO:0000166//nucleotide binding;GO:0003924//GTPase activity;GO:0005200//structural constituent of cytoskeleton;GO:0005525//GTP binding	GO:0000226//microtubule cytoskeleton organization;GO:0000278//mitotic cell cycle;GO:0007017//microtubule-based process;GO:0051225//spindle assembly
6	ENSGALG00000014071	1.10823	2.68907	653	77	0.144	0.273	1.27885	0.000568531	1	up	ITPR2	inositol 1,4,5-trisphosphate receptor type 2 [Source:NCBI gene;Acc:418212]	Environmental Information Processing;Cellular Processes;Organismal Systems;Cellular Processes;Environmental Information Processing;Organismal Systems;Cellular Processes;Environmental Information Processing;Organismal Systems;Cellular Processes	Signal transduction;Cell growth and death;Immune system;Cell growth and death;Signal transduction;Circulatory system;Cell growth and death;Signal transduction;Endocrine system;Cellular community - eukaryotes	ko04020//Calcium signaling pathway;ko04218//Cellular senescence;ko04621//NOD-like receptor signaling pathway;ko04210//Apoptosis;ko04371//Apelin signaling pathway;ko04270//Vascular smooth muscle contraction;ko04114//Oocyte meiosis;ko04070//Phosphatidylinositol signaling system;ko04912//GnRH signaling pathway;ko04540//Gap junction	K04959;K04959;K04959;K04959;K04959;K04959;K04959;K04959;K04959;K04959	GO:0005634//nucleus;GO:0005737//cytoplasm;GO:0005783//endoplasmic reticulum;GO:0005789//endoplasmic reticulum membrane;GO:0005886//plasma membrane;GO:0005938//cell cortex;GO:0016020//membrane;GO:0016021//integral component of membrane;GO:0016529//sarcoplasmic reticulum;GO:0030659//cytoplasmic vesicle membrane;GO:0030667//secretory granule membrane;GO:0033017//sarcoplasmic reticulum membrane;GO:00…	GO:0005216//ion channel activity;GO:0005220//inositol 1,4,5-trisphosphate-sensitive calcium-release channel activity;GO:0005262//calcium channel activity;GO:0005509//calcium ion binding;GO:0015278//calcium-release channel activity;GO:0035091//phosphatidylinositol binding;GO:0070679//inositol 1,4,5 trisphosphate binding;GO:0097110//scaffold protein binding	GO:0001666//response to hypoxia;GO:0006811//ion transport;GO:0006816//calcium ion transport;GO:0048016//inositol phosphate-mediated signaling;GO:0051209//release of sequestered calcium ion into cytosol;GO:0055085//transmembrane transport;GO:0070588//calcium ion transmembrane transport;GO:0071320//cellular response to cAMP;GO:0071361//cellular response to ethanol
6	ENSGALG00000039228	1.71368	4.15084	653	77	0.231	0.299	1.27631	6.04e-07	0.0133902	up	ZFP36L1	ZFP36 ring finger protein like 1 [Source:NCBI gene;Acc:101751828]	Cellular Processes	Cell growth and death	ko04218//Cellular senescence	K18753	GO:0000932//P-body;GO:0005634//nucleus;GO:0005737//cytoplasm;GO:0005829//cytosol;GO:1990904//ribonucleoprotein complex	GO:0003729//mRNA binding;GO:0003730//mRNA 3'-UTR binding;GO:0035925//mRNA 3'-UTR AU-rich region binding;GO:0046872//metal ion binding;GO:0071889//14-3-3 protein binding	GO:0000165//MAPK cascade;GO:0000288//nuclear-transcribed mRNA catabolic process, deadenylation-dependent decay;GO:0001570//vasculogenesis;GO:0003342//proepicardium development;GO:0006417//regulation of translation;GO:0006915//apoptotic process;GO:0007507//heart development;GO:0008283//cell proliferation;GO:0009611//response to wounding;GO:0010468//regulation of gene expression;GO:0010837//regulat…
6	ENSGALG00000040335	1.16817	2.81461	653	77	0.158	0.273	1.26868	0.000136496	1	up	CEBPZ	CCAAT enhancer binding protein zeta [Source:NCBI gene;Acc:421474]	-	-	-	-	GO:0005634//nucleus	GO:0000978//RNA polymerase II proximal promoter sequence-specific DNA binding;GO:0001228//DNA-binding transcription activator activity, RNA polymerase II-specific	GO:0042254//ribosome biogenesis;GO:0045944//positive regulation of transcription by RNA polymerase II
6	ENSGALG00000008553	1.25039	2.9849	653	77	0.168	0.273	1.25531	0.00028994	1	up	INO80	INO80 complex subunit [Source:NCBI gene;Acc:423210]	-	-	-	-	GO:0005634//nucleus;GO:0005654//nucleoplasm;GO:0005886//plasma membrane;GO:0016604//nuclear body;GO:0031011//Ino80 complex;GO:0045111//intermediate filament cytoskeleton	GO:0003677//DNA binding;GO:0005524//ATP binding;GO:0008094//DNA-dependent ATPase activity;GO:0016887//ATPase activity;GO:0042393//histone binding;GO:0043014//alpha-tubulin binding;GO:0043140//ATP-dependent 3'-5' DNA helicase activity	GO:0000070//mitotic sister chromatid segregation;GO:0000724//double-strand break repair via homologous recombination;GO:0006281//DNA repair;GO:0006302//double-strand break repair;GO:0006338//chromatin remodeling;GO:0006351//transcription, DNA-templated;GO:0010571//positive regulation of nuclear cell cycle DNA replication;GO:0030307//positive regulation of cell growth;GO:0032508//DNA duplex unwind…
6	ENSGALG00000038217	2.29228	5.43082	653	77	0.291	0.416	1.24438	1.1e-08	0.000243469	up	CD82	CD82 molecule [Source:NCBI gene;Acc:423172]	Cellular Processes	Cell growth and death	ko04115//p53 signaling pathway	K06509	GO:0005887//integral component of plasma membrane;GO:0016020//membrane;GO:0016021//integral component of membrane	-	GO:0007166//cell surface receptor signaling pathway
6	ENSGALG00000014324	2.01102	4.72596	653	77	0.256	0.39	1.23268	2.75e-08	0.000610102	up	SLC2A14	solute carrier family 2 member 14 [Source:NCBI gene;Acc:396517]	-	-	-	-	GO:0002080//acrosomal membrane;GO:0005615//extracellular space;GO:0005623//cell;GO:0005737//cytoplasm;GO:0005886//plasma membrane;GO:0016020//membrane;GO:0016021//integral component of membrane	GO:0005215//transporter activity;GO:0005355//glucose transmembrane transporter activity;GO:0022857//transmembrane transporter activity;GO:0033300//dehydroascorbic acid transmembrane transporter activity;GO:0055056//D-glucose transmembrane transporter activity	GO:0055085//transmembrane transport;GO:0070837//dehydroascorbic acid transport;GO:1904659//glucose transmembrane transport
6	ENSGALG00000008756	2.64837	6.21161	653	77	0.224	0.338	1.22986	0.000362237	1	up	PLEK	pleckstrin [Source:NCBI gene;Acc:395669]	-	-	-	-	GO:0005737//cytoplasm;GO:0005886//plasma membrane;GO:0032587//ruffle membrane	GO:0005080//protein kinase C binding;GO:0042803//protein homodimerization activity;GO:0043325//phosphatidylinositol-3,4-bisphosphate binding	GO:0002244//hematopoietic progenitor cell differentiation;GO:0002576//platelet degranulation;GO:0006904//vesicle docking involved in exocytosis;GO:0007229//integrin-mediated signaling pathway;GO:0010572//positive regulation of platelet activation;GO:0010920//negative regulation of inositol phosphate biosynthetic process;GO:0010925//positive regulation of inositol-polyphosphate 5-phosphatase activ…
6	ENSGALG00000011203	2.85602	6.69433	653	77	0.234	0.364	1.22893	0.000480899	1	up	HPSE	heparanase [Source:NCBI gene;Acc:373981]	Metabolism;Metabolism	Global and overview maps;Glycan biosynthesis and metabolism	ko01100//Metabolic pathways;ko00531//Glycosaminoglycan degradation	K07964;K07964	GO:0005634//nucleus;GO:0005654//nucleoplasm;GO:0005764//lysosome;GO:0016020//membrane;GO:0031012//extracellular matrix;GO:0043231//intracellular membrane-bounded organelle;GO:0045121//membrane raft	GO:0016798//hydrolase activity, acting on glycosyl bonds;GO:0030305//heparanase activity;GO:0045545//syndecan binding;GO:0046983//protein dimerization activity	GO:0007160//cell-matrix adhesion;GO:0010575//positive regulation of vascular endothelial growth factor production;GO:0030194//positive regulation of blood coagulation;GO:0030200//heparan sulfate proteoglycan catabolic process;GO:0033690//positive regulation of osteoblast proliferation;GO:0042060//wound healing;GO:0051797//regulation of hair follicle development;GO:0051798//positive regulation of …
6	ENSGALG00000006439	1.82037	4.26263	653	77	0.239	0.39	1.22751	6.17e-07	0.01367	up	ARHGEF6	Rac/Cdc42 guanine nucleotide exchange factor 6 [Source:NCBI gene;Acc:422247]	Cellular Processes	Cell motility	ko04810//Regulation of actin cytoskeleton	K05729	GO:0030027//lamellipodium;GO:0042995//cell projection	GO:0005085//guanyl-nucleotide exchange factor activity;GO:0005089//Rho guanyl-nucleotide exchange factor activity;GO:0005515//protein binding	GO:0035023//regulation of Rho protein signal transduction;GO:0035556//intracellular signal transduction
6	ENSGALG00000016535	1.51132	3.45909	653	77	0.196	0.286	1.19459	0.000160002	1	up	RAB10	RAB10, member RAS oncogene family [Source:NCBI gene;Acc:421994]	Cellular Processes	Transport and catabolism	ko04144//Endocytosis	K07903	GO:0005768//endosome;GO:0005789//endoplasmic reticulum membrane;GO:0005794//Golgi apparatus;GO:0005886//plasma membrane;GO:0005929//cilium;GO:0008021//synaptic vesicle;GO:0032593//insulin-responsive compartment;GO:0048471//perinuclear region of cytoplasm;GO:0055037//recycling endosome;GO:0070382//exocytic vesicle;GO:0071782//endoplasmic reticulum tubular network	GO:0003924//GTPase activity;GO:0005525//GTP binding;GO:0019003//GDP binding;GO:0031489//myosin V binding	GO:0006886//intracellular protein transport;GO:0006904//vesicle docking involved in exocytosis;GO:0009306//protein secretion;GO:0016192//vesicle-mediated transport;GO:0016197//endosomal transport;GO:0017157//regulation of exocytosis;GO:0019882//antigen processing and presentation;GO:0032482//Rab protein signal transduction;GO:0032869//cellular response to insulin stimulus;GO:0045055//regulated ex…
6	ENSGALG00000010642	1.75991	4.02147	653	77	0.225	0.299	1.19222	3.66e-09	8.11e-05	up	IRF2	interferon regulatory factor 2 [Source:NCBI gene;Acc:396115]	-	-	-	-	GO:0005634//nucleus;GO:0005654//nucleoplasm;GO:0005829//cytosol;GO:0005925//focal adhesion	GO:0000977//RNA polymerase II regulatory region sequence-specific DNA binding;GO:0000981//DNA-binding transcription factor activity, RNA polymerase II-specific;GO:0001228//DNA-binding transcription activator activity, RNA polymerase II-specific;GO:0003677//DNA binding;GO:0003700//DNA-binding transcription factor activity;GO:0044212//transcription regulatory region DNA binding	GO:0002376//immune system process;GO:0006355//regulation of transcription, DNA-templated;GO:0008283//cell proliferation;GO:0045944//positive regulation of transcription by RNA polymerase II;GO:0051607//defense response to virus
6	ENSGALG00000007145	2.32709	5.30292	653	77	0.257	0.377	1.18826	1.33e-05	0.295323	up	ITGB1	integrin subunit beta 1 [Source:NCBI gene;Acc:374058]	Cellular Processes;Cellular Processes;Cellular Processes;Cellular Processes;Environmental Information Processing;Environmental Information Processing	Cell motility;Cellular community - eukaryotes;Cellular community - eukaryotes;Transport and catabolism;Signaling molecules and interaction;Signaling molecules and interaction	ko04810//Regulation of actin cytoskeleton;ko04510//Focal adhesion;ko04530//Tight junction;ko04145//Phagosome;ko04514//Cell adhesion molecules (CAMs);ko04512//ECM-receptor interaction	K05719;K05719;K05719;K05719;K05719;K05719	GO:0005623//cell;GO:0005737//cytoplasm;GO:0005886//plasma membrane;GO:0005925//focal adhesion;GO:0008305//integrin complex;GO:0009897//external side of plasma membrane;GO:0009986//cell surface;GO:0014704//intercalated disc;GO:0016020//membrane;GO:0016021//integral component of membrane;GO:0030175//filopodium;GO:0031410//cytoplasmic vesicle;GO:0031594//neuromuscular junction;GO:0032587//ruffle mem…	GO:0001968//fibronectin binding;GO:0002020//protease binding;GO:0003779//actin binding;GO:0005178//integrin binding;GO:0019960//C-X3-C chemokine binding;GO:0038023//signaling receptor activity;GO:0043236//laminin binding;GO:0044877//protein-containing complex binding;GO:0046982//protein heterodimerization activity;GO:0050839//cell adhesion molecule binding;GO:0098639//collagen binding involved in…	GO:0000082//G1/S transition of mitotic cell cycle;GO:0001708//cell fate specification;GO:0002042//cell migration involved in sprouting angiogenesis;GO:0007155//cell adhesion;GO:0007159//leukocyte cell-cell adhesion;GO:0007160//cell-matrix adhesion;GO:0007161//calcium-independent cell-matrix adhesion;GO:0007229//integrin-mediated signaling pathway;GO:0008284//positive regulation of cell proliferat…
6	ENSGALG00000039327	3.34329	7.60205	653	77	0.387	0.506	1.18512	1.9e-11	4.21e-07	up	VAV3	vav 3 guanine nucleotide exchange factor [Source:NCBI gene;Acc:373939]	Cellular Processes;Cellular Processes	Cell motility;Cellular community - eukaryotes	ko04810//Regulation of actin cytoskeleton;ko04510//Focal adhesion	K05730;K05730	GO:0005737//cytoplasm;GO:0005886//plasma membrane	GO:0005085//guanyl-nucleotide exchange factor activity;GO:0005089//Rho guanyl-nucleotide exchange factor activity;GO:0005154//epidermal growth factor receptor binding;GO:0005515//protein binding;GO:0030676//Rac guanyl-nucleotide exchange factor activity;GO:0046872//metal ion binding	GO:0006906//vesicle fusion;GO:0006974//cellular response to DNA damage stimulus;GO:0007229//integrin-mediated signaling pathway;GO:0007264//small GTPase mediated signal transduction;GO:0008361//regulation of cell size;GO:0016477//cell migration;GO:0030031//cell projection assembly;GO:0030032//lamellipodium assembly;GO:0030593//neutrophil chemotaxis;GO:0030890//positive regulation of B cell prolif…
6	ENSGALG00000052842	7.97796	17.9566	653	77	0.648	0.74	1.17043	2.63e-14	5.82e-10	up	ANKRD11	ankyrin repeat domain 11 [Source:NCBI gene;Acc:415845]	-	-	-	-	GO:0005634//nucleus;GO:0005654//nucleoplasm;GO:0005829//cytosol;GO:0005886//plasma membrane	GO:0005515//protein binding	GO:0001701//in utero embryonic development;GO:0001894//tissue homeostasis;GO:0035264//multicellular organism growth;GO:0042475//odontogenesis of dentin-containing tooth;GO:0048705//skeletal system morphogenesis;GO:0060323//head morphogenesis;GO:0060325//face morphogenesis;GO:0060348//bone development
6	ENSGALG00000008206	1.71977	3.84681	653	77	0.204	0.273	1.16145	4.74e-06	0.105064	up	TESC	tescalcin [Source:NCBI gene;Acc:771113]	-	-	-	-	GO:0005634//nucleus;GO:0005737//cytoplasm;GO:0005829//cytosol;GO:0005886//plasma membrane;GO:0030027//lamellipodium	GO:0005509//calcium ion binding	GO:0008285//negative regulation of cell proliferation;GO:0010628//positive regulation of gene expression;GO:0030854//positive regulation of granulocyte differentiation;GO:0032417//positive regulation of sodium:proton antiporter activity;GO:0033628//regulation of cell adhesion mediated by integrin;GO:0045654//positive regulation of megakaryocyte differentiation;GO:0045893//positive regulation of t…
6	ENSGALG00000004252	1.45284	3.24562	653	77	0.191	0.299	1.15961	2.13e-05	0.47181	up	-	cathepsin L1-like [Source:NCBI gene;Acc:420160]	Cellular Processes;Cellular Processes;Cellular Processes;Cellular Processes	Transport and catabolism;Cell growth and death;Transport and catabolism;Transport and catabolism	ko04145//Phagosome;ko04210//Apoptosis;ko04140//Autophagy - animal;ko04142//Lysosome	K01365;K01365;K01365;K01365	GO:0005615//extracellular space;GO:0005764//lysosome	GO:0004197//cysteine-type endopeptidase activity;GO:0008233//peptidase activity;GO:0008234//cysteine-type peptidase activity;GO:0016787//hydrolase activity	GO:0006508//proteolysis;GO:0051603//proteolysis involved in cellular protein catabolic process
6	ENSGALG00000030791	1.70483	3.78736	653	77	0.23	0.351	1.15157	5.93e-07	0.0131357	up	DIAPH2	diaphanous related formin 2 [Source:NCBI gene;Acc:374040]	Cellular Processes	Cell motility	ko04810//Regulation of actin cytoskeleton	K05741	-	GO:0003779//actin binding;GO:0017048//Rho GTPase binding	GO:0007015//actin filament organization;GO:0007292//female gamete generation;GO:0016043//cellular component organization;GO:0030036//actin cytoskeleton organization
6	ENSGALG00000006418	2.41405	5.35504	653	77	0.305	0.429	1.14944	1.91e-07	0.00424115	up	PDPK1	3-phosphoinositide dependent protein kinase 1 [Source:NCBI gene;Acc:416588]	Cellular Processes;Environmental Information Processing;Environmental Information Processing;Cellular Processes;Organismal Systems;Cellular Processes;Organismal Systems	Cellular community - eukaryotes;Signal transduction;Signal transduction;Cell growth and death;Endocrine system;Transport and catabolism;Endocrine system	ko04510//Focal adhesion;ko04150//mTOR signaling pathway;ko04068//FoxO signaling pathway;ko04210//Apoptosis;ko04910//Insulin signaling pathway;ko04140//Autophagy - animal;ko03320//PPAR signaling pathway	K06276;K06276;K06276;K06276;K06276;K06276;K06276	GO:0005737//cytoplasm;GO:0005886//plasma membrane;GO:0014069//postsynaptic density;GO:0031410//cytoplasmic vesicle;GO:0042995//cell projection	GO:0004672//protein kinase activity;GO:0004674//protein serine/threonine kinase activity;GO:0004676//3-phosphoinositide-dependent protein kinase activity;GO:0005524//ATP binding;GO:0016004//phospholipase activator activity;GO:0043274//phospholipase binding	GO:0003323//type B pancreatic cell development;GO:0006468//protein phosphorylation;GO:0006469//negative regulation of protein kinase activity;GO:0006972//hyperosmotic response;GO:0007173//epidermal growth factor receptor signaling pathway;GO:0010518//positive regulation of phospholipase activity;GO:0010594//regulation of endothelial cell migration;GO:0010667//negative regulation of cardiac muscle…
6	ENSGALG00000007260	1.62448	3.60339	653	77	0.208	0.325	1.14938	3.46e-05	0.766285	up	ZEB1	zinc finger E-box binding homeobox 1 [Source:NCBI gene;Acc:396029]	-	-	-	-	GO:0005634//nucleus;GO:0005654//nucleoplasm;GO:0005667//transcription factor complex;GO:0005829//cytosol	GO:0001227//DNA-binding transcription repressor activity, RNA polymerase II-specific;GO:0003676//nucleic acid binding;GO:0003677//DNA binding;GO:0003682//chromatin binding;GO:0003700//DNA-binding transcription factor activity;GO:0008134//transcription factor binding;GO:0070888//E-box binding	GO:0000122//negative regulation of transcription by RNA polymerase II;GO:0007389//pattern specification process;GO:0007417//central nervous system development;GO:0008285//negative regulation of cell proliferation;GO:0010464//regulation of mesenchymal cell proliferation;GO:0017015//regulation of transforming growth factor beta receptor signaling pathway;GO:0030857//negative regulation of epithelia…
6	ENSGALG00000013971	2.007	4.43924	653	77	0.208	0.325	1.14527	0.000466205	1	up	SGK1	serum/glucocorticoid regulated kinase 1 [Source:NCBI gene;Acc:395133]	Environmental Information Processing;Environmental Information Processing	Signal transduction;Signal transduction	ko04150//mTOR signaling pathway;ko04068//FoxO signaling pathway	K13302;K13302	GO:0005634//nucleus;GO:0005737//cytoplasm;GO:0005783//endoplasmic reticulum;GO:0005829//cytosol;GO:0016607//nuclear speck	GO:0000166//nucleotide binding;GO:0004672//protein kinase activity;GO:0004674//protein serine/threonine kinase activity;GO:0004712//protein serine/threonine/tyrosine kinase activity;GO:0005524//ATP binding;GO:0015459//potassium channel regulator activity;GO:0016301//kinase activity;GO:0016740//transferase activity	GO:0006468//protein phosphorylation;GO:0006915//apoptotic process;GO:0006974//cellular response to DNA damage stimulus;GO:0016310//phosphorylation;GO:0018105//peptidyl-serine phosphorylation;GO:0035556//intracellular signal transduction;GO:0048812//neuron projection morphogenesis
6	ENSGALG00000008097	1.74181	3.80921	653	77	0.224	0.325	1.1289	3.49e-06	0.0774039	up	CELF1	CUGBP Elav-like family member 1 [Source:NCBI gene;Acc:373923]	-	-	-	-	GO:0005634//nucleus;GO:0005654//nucleoplasm;GO:0005737//cytoplasm;GO:1990904//ribonucleoprotein complex	GO:0003676//nucleic acid binding;GO:0003723//RNA binding;GO:0003729//mRNA binding;GO:0031369//translation initiation factor binding	GO:0000381//regulation of alternative mRNA splicing, via spliceosome;GO:0006376//mRNA splice site selection;GO:0007286//spermatid development;GO:0040018//positive regulation of multicellular organism growth
6	ENSGALG00000009332	1.4387	3.11448	653	77	0.199	0.286	1.11423	6.91e-05	1	up	-	-	-	-	-	-	-	GO:0003676//nucleic acid binding;GO:0003723//RNA binding;GO:0003729//mRNA binding	GO:0000381//regulation of alternative mRNA splicing, via spliceosome;GO:0006397//mRNA processing
6	ENSGALG00000010651	1.32973	2.85992	653	77	0.173	0.26	1.10483	0.00115823	1	up	TFB2M	transcription factor B2, mitochondrial [Source:NCBI gene;Acc:421488]	-	-	-	-	GO:0005739//mitochondrion;GO:0005759//mitochondrial matrix;GO:0042645//mitochondrial nucleoid	GO:0000179//rRNA (adenine-N6,N6-)-dimethyltransferase activity;GO:0003712//transcription coregulator activity;GO:0003723//RNA binding;GO:0008168//methyltransferase activity;GO:0008649//rRNA methyltransferase activity;GO:0016740//transferase activity	GO:0000154//rRNA modification;GO:0006355//regulation of transcription, DNA-templated;GO:0006364//rRNA processing;GO:0006390//mitochondrial transcription;GO:0006391//transcription initiation from mitochondrial promoter;GO:0031167//rRNA methylation;GO:0032259//methylation;GO:0045893//positive regulation of transcription, DNA-templated
6	ENSGALG00000033178	6.60702	14.0381	653	77	0.505	0.584	1.08728	4.4e-10	9.76e-06	up	KLF6	Kruppel like factor 6 [Source:NCBI gene;Acc:420463]	-	-	-	-	GO:0001650//fibrillar center;GO:0005634//nucleus;GO:0005730//nucleolus;GO:0005829//cytosol;GO:0043231//intracellular membrane-bounded organelle	GO:0000978//RNA polymerase II proximal promoter sequence-specific DNA binding;GO:0000981//DNA-binding transcription factor activity, RNA polymerase II-specific;GO:0001228//DNA-binding transcription activator activity, RNA polymerase II-specific;GO:0003676//nucleic acid binding;GO:0003690//double-stranded DNA binding	GO:0006357//regulation of transcription by RNA polymerase II;GO:0019221//cytokine-mediated signaling pathway;GO:0045944//positive regulation of transcription by RNA polymerase II
6	ENSGALG00000031796	1.37199	2.90049	653	77	0.178	0.26	1.08003	0.000297362	1	up	SP3	Sp3 transcription factor [Source:NCBI gene;Acc:395302]	-	-	-	-	GO:0005634//nucleus;GO:0016605//PML body;GO:0017053//transcriptional repressor complex	GO:0000977//RNA polymerase II regulatory region sequence-specific DNA binding;GO:0000978//RNA polymerase II proximal promoter sequence-specific DNA binding;GO:0000981//DNA-binding transcription factor activity, RNA polymerase II-specific;GO:0000987//proximal promoter sequence-specific DNA binding;GO:0001227//DNA-binding transcription repressor activity, RNA polymerase II-specific;GO:0003676//nucl…	GO:0000122//negative regulation of transcription by RNA polymerase II;GO:0001503//ossification;GO:0001779//natural killer cell differentiation;GO:0001889//liver development;GO:0006355//regulation of transcription, DNA-templated;GO:0006357//regulation of transcription by RNA polymerase II;GO:0030183//B cell differentiation;GO:0030217//T cell differentiation;GO:0030218//erythrocyte differentiation;…
6	ENSGALG00000004859	1.55921	3.26227	653	77	0.19	0.26	1.06506	0.00022655	1	up	ZNFX1	zinc finger NFX1-type containing 1 [Source:NCBI gene;Acc:419218]	-	-	-	-	GO:0000775//chromosome, centromeric region;GO:0005634//nucleus;GO:0031380//nuclear RNA-directed RNA polymerase complex	GO:0003723//RNA binding	GO:0030702//chromatin silencing at centromere;GO:0031048//chromatin silencing by small RNA
6	ENSGALG00000002548	5.93385	12.3076	653	77	0.498	0.571	1.05251	3.13e-08	0.000693512	up	TLN1	talin 1 [Source:NCBI gene;Acc:395194]	Cellular Processes	Cellular community - eukaryotes	ko04510//Focal adhesion	K06271	GO:0001726//ruffle;GO:0005856//cytoskeleton;GO:0005925//focal adhesion	GO:0001786//phosphatidylserine binding;GO:0003779//actin binding;GO:0005178//integrin binding;GO:0005200//structural constituent of cytoskeleton;GO:0017166//vinculin binding;GO:0030274//LIM domain binding;GO:0035091//phosphatidylinositol binding;GO:0051015//actin filament binding	GO:0007016//cytoskeletal anchoring at plasma membrane;GO:0007044//cell-substrate junction assembly;GO:0007155//cell adhesion;GO:0007229//integrin-mediated signaling pathway;GO:0030866//cortical actin cytoskeleton organization;GO:0033622//integrin activation
6	ENSGALG00000038128	1.70138	3.51287	653	77	0.217	0.286	1.04594	1.12e-05	0.247654	up	UBE2D2	ubiquitin conjugating enzyme E2 D2 [Source:NCBI gene;Acc:416137]	Genetic Information Processing;Genetic Information Processing	Folding, sorting and degradation;Folding, sorting and degradation	ko04141//Protein processing in endoplasmic reticulum;ko04120//Ubiquitin mediated proteolysis	K06689;K06689	GO:0000151//ubiquitin ligase complex	GO:0000166//nucleotide binding;GO:0005524//ATP binding;GO:0016740//transferase activity;GO:0031625//ubiquitin protein ligase binding;GO:0061631//ubiquitin conjugating enzyme activity	GO:0006511//ubiquitin-dependent protein catabolic process;GO:0070936//protein K48-linked ubiquitination
6	ENSGALG00000039182	2.49052	5.13749	653	77	0.306	0.364	1.04462	2.48e-08	0.000548717	up	TBL1XR1	transducin beta like 1 X-linked receptor 1 [Source:NCBI gene;Acc:426284]	Environmental Information Processing	Signal transduction	ko04310//Wnt signaling pathway	K04508	GO:0000118//histone deacetylase complex;GO:0005634//nucleus;GO:0017053//transcriptional repressor complex;GO:0072686//mitotic spindle	GO:0003677//DNA binding;GO:0003714//transcription corepressor activity;GO:0005515//protein binding;GO:0008013//beta-catenin binding;GO:0042393//histone binding;GO:0044212//transcription regulatory region DNA binding;GO:0047485//protein N-terminus binding	GO:0000122//negative regulation of transcription by RNA polymerase II;GO:0001835//blastocyst hatching;GO:0002021//response to dietary excess;GO:0006357//regulation of transcription by RNA polymerase II;GO:0010468//regulation of gene expression;GO:0016042//lipid catabolic process;GO:0016575//histone deacetylation;GO:0035264//multicellular organism growth;GO:0043161//proteasome-mediated ubiquitin-d…
6	ENSGALG00000038730	1.50946	3.08899	653	77	0.194	0.286	1.0331	0.000151309	1	up	GIGYF2	GRB10 interacting GYF protein 2 [Source:NCBI gene;Acc:424743]	-	-	-	-	GO:0005737//cytoplasm;GO:0005768//endosome;GO:0005783//endoplasmic reticulum;GO:0005794//Golgi apparatus;GO:0005829//cytosol;GO:0010494//cytoplasmic stress granule;GO:0016021//integral component of membrane;GO:0031982//vesicle;GO:0032991//protein-containing complex;GO:0043204//perikaryon;GO:1990635//proximal dendrite	GO:0005515//protein binding;GO:0070064//proline-rich region binding	GO:0007631//feeding behavior;GO:0008344//adult locomotory behavior;GO:0009791//post-embryonic development;GO:0016441//posttranscriptional gene silencing;GO:0017148//negative regulation of translation;GO:0021522//spinal cord motor neuron differentiation;GO:0031571//mitotic G1 DNA damage checkpoint;GO:0035264//multicellular organism growth;GO:0044267//cellular protein metabolic process;GO:0048009//…
6	ENSGALG00000031604	1.89111	3.84975	653	77	0.251	0.299	1.02553	4.78e-06	0.106044	up	-	tet methylcytosine dioxygenase 1 [Source:NCBI gene;Acc:423690]	-	-	-	-	GO:0005634//nucleus	GO:0003677//DNA binding;GO:0005506//iron ion binding;GO:0008270//zinc ion binding;GO:0070579//methylcytosine dioxygenase activity	GO:0006211//5-methylcytosine catabolic process;GO:0045944//positive regulation of transcription by RNA polymerase II;GO:0055114//oxidation-reduction process;GO:0070989//oxidative demethylation;GO:0080111//DNA demethylation
6	ENSGALG00000005037	6.70314	13.6283	653	77	0.507	0.61	1.02369	1.26e-06	0.027971	up	-	-	-	-	-	-	GO:0000776//kinetochore;GO:0030496//midbody;GO:0045171//intercellular bridge	GO:0004672//protein kinase activity;GO:0005524//ATP binding	GO:0006468//protein phosphorylation;GO:0007094//mitotic spindle assembly checkpoint;GO:0007140//male meiotic nuclear division;GO:0008608//attachment of spindle microtubules to kinetochore;GO:0043063//intercellular bridge organization;GO:0051306//mitotic sister chromatid separation
6	ENSGALG00000008335	2.19882	4.43523	653	77	0.303	0.312	1.01228	9.72e-12	2.15e-07	up	PHTF2	putative homeodomain transcription factor 2 [Source:NCBI gene;Acc:417728]	-	-	-	-	GO:0005783//endoplasmic reticulum;GO:0016020//membrane;GO:0016021//integral component of membrane	-	-
6	ENSGALG00000049653	4.54088	9.15435	653	77	0.464	0.519	1.01149	2.63e-09	5.83e-05	up	KMT2C	lysine methyltransferase 2C [Source:NCBI gene;Acc:420437]	Metabolism	Amino acid metabolism	ko00310//Lysine degradation	K09188	GO:0005634//nucleus;GO:0035097//histone methyltransferase complex;GO:0044666//MLL3/4 complex	GO:0005515//protein binding;GO:0042800//histone methyltransferase activity (H3-K4 specific)	-
6	ENSGALG00000017249	2.4653	4.95528	653	77	0.302	0.403	1.0072	1.67e-06	0.036984	up	PCF11	PCF11, cleavage and polyadenylation factor subunit [Source:NCBI gene;Acc:419021]	Genetic Information Processing	Translation	ko03015//mRNA surveillance pathway	K14400	GO:0005654//nucleoplasm;GO:0005737//cytoplasm;GO:0005739//mitochondrion	GO:0000993//RNA polymerase II complex binding;GO:0003729//mRNA binding	GO:0006369//termination of RNA polymerase II transcription;GO:0006378//mRNA polyadenylation
6	ENSGALG00000011870	2.10102	4.22285	653	77	0.266	0.312	1.00713	4.51e-07	0.00999252	up	HIF1A	hypoxia inducible factor 1 subunit alpha [Source:NCBI gene;Acc:374177]	Cellular Processes;Cellular Processes	Transport and catabolism;Transport and catabolism	ko04140//Autophagy - animal;ko04137//Mitophagy - animal	K08268;K08268	GO:0005634//nucleus;GO:0005654//nucleoplasm;GO:0005667//transcription factor complex;GO:0005737//cytoplasm;GO:0005829//cytosol;GO:0016604//nuclear body;GO:0016607//nuclear speck;GO:0031514//motile cilium;GO:0032991//protein-containing complex;GO:0090575//RNA polymerase II transcription factor complex;GO:1904115//axon cytoplasm	GO:0000981//DNA-binding transcription factor activity, RNA polymerase II-specific;GO:0001228//DNA-binding transcription activator activity, RNA polymerase II-specific;GO:0002039//p53 binding;GO:0003677//DNA binding;GO:0003700//DNA-binding transcription factor activity;GO:0005515//protein binding;GO:0008134//transcription factor binding;GO:0019899//enzyme binding;GO:0019901//protein kinase binding…	GO:0001525//angiogenesis;GO:0001568//blood vessel development;GO:0001666//response to hypoxia;GO:0001755//neural crest cell migration;GO:0001837//epithelial to mesenchymal transition;GO:0001922//B-1 B cell homeostasis;GO:0001944//vasculature development;GO:0001947//heart looping;GO:0002052//positive regulation of neuroblast proliferation;GO:0002248//connective tissue replacement involved in infla…
6	ENSGALG00000050309	6.28587	3.13784	653	77	0.571	0.26	-1.00234	6.56e-07	0.0145384	down	-	histone cluster 1, H2bo [Source:NCBI gene;Acc:100858607]	-	-	-	-	GO:0000786//nucleosome;GO:0005634//nucleus;GO:0005694//chromosome	GO:0003677//DNA binding;GO:0046982//protein heterodimerization activity	GO:0006334//nucleosome assembly;GO:0042742//defense response to bacterium
6	ENSGALG00000012456	7.92906	3.95622	653	77	0.669	0.325	-1.00303	3.32e-08	0.00073516	down	RAC2	Rac family small GTPase 2 [Source:NCBI gene;Acc:418044]	Environmental Information Processing;Cellular Processes;Cellular Processes;Environmental Information Processing;Cellular Processes;Environmental Information Processing	Signal transduction;Cell motility;Cellular community - eukaryotes;Signal transduction;Cellular community - eukaryotes;Signal transduction	ko04010//MAPK signaling pathway;ko04810//Regulation of actin cytoskeleton;ko04510//Focal adhesion;ko04310//Wnt signaling pathway;ko04520//Adherens junction;ko04370//VEGF signaling pathway	K07860;K07860;K07860;K07860;K07860;K07860	GO:0005622//intracellular;GO:0005635//nuclear envelope;GO:0005737//cytoplasm;GO:0005829//cytosol;GO:0005884//actin filament;GO:0005886//plasma membrane;GO:0016020//membrane;GO:0030027//lamellipodium;GO:0031410//cytoplasmic vesicle;GO:0042995//cell projection	GO:0000166//nucleotide binding;GO:0003924//GTPase activity;GO:0005525//GTP binding;GO:0019887//protein kinase regulator activity;GO:0019901//protein kinase binding	GO:0006935//chemotaxis;GO:0007015//actin filament organization;GO:0007186//G protein-coupled receptor signaling pathway;GO:0007264//small GTPase mediated signal transduction;GO:0007266//Rho protein signal transduction;GO:0008045//motor neuron axon guidance;GO:0008284//positive regulation of cell proliferation;GO:0010592//positive regulation of lamellipodium assembly;GO:0010810//regulation of cell…
6	ENSGALG00000025999	2.19316	1.09243	653	77	0.291	0.117	-1.00546	0.000355845	1	down	NDUFA4	NDUFA4, mitochondrial complex associated [Source:NCBI gene;Acc:772135]	Metabolism;Metabolism	Global and overview maps;Energy metabolism	ko01100//Metabolic pathways;ko00190//Oxidative phosphorylation	K03948;K03948	GO:0005739//mitochondrion;GO:0005747//mitochondrial respiratory chain complex I;GO:0005751//mitochondrial respiratory chain complex IV;GO:0016020//membrane;GO:0016021//integral component of membrane	GO:0004129//cytochrome-c oxidase activity;GO:0044877//protein-containing complex binding	GO:0022900//electron transport chain;GO:1902600//proton transmembrane transport
6	ENSGALG00000052471	2.06673	1.02644	653	77	0.273	0.104	-1.0097	0.000190117	1	down	MRPS21	mitochondrial ribosomal protein S21 [Source:NCBI gene;Acc:426666]	Genetic Information Processing	Translation	ko03010//Ribosome	K02970	GO:0005840//ribosome	GO:0003735//structural constituent of ribosome	GO:0006412//translation
6	ENSGALG00000016775	43.1077	20.7397	653	77	0.991	0.857	-1.05555	8.35e-24	1.85e-19	down	RPL31	ribosomal protein L31 [Source:NCBI gene;Acc:418710]	Genetic Information Processing	Translation	ko03010//Ribosome	K02910	GO:0005622//intracellular;GO:0005840//ribosome;GO:0022625//cytosolic large ribosomal subunit;GO:0042788//polysomal ribosome;GO:0045202//synapse	GO:0003735//structural constituent of ribosome	GO:0002181//cytoplasmic translation;GO:0006412//translation
6	ENSGALG00000015906	2.86948	1.36544	653	77	0.349	0.13	-1.07142	1.42e-05	0.315557	down	COX7A2	cytochrome c oxidase subunit 7A2 [Source:NCBI gene;Acc:772260]	Metabolism;Organismal Systems	Energy metabolism;Circulatory system	ko00190//Oxidative phosphorylation;ko04260//Cardiac muscle contraction	K02270;K02270	GO:0005746//mitochondrial respiratory chain;GO:0016020//membrane;GO:0016021//integral component of membrane	GO:0004129//cytochrome-c oxidase activity;GO:0009055//electron transfer activity	GO:0022900//electron transport chain;GO:1902600//proton transmembrane transport
6	ENSGALG00000007971	3.66667	1.73606	653	77	0.427	0.156	-1.07865	1.26e-06	0.0279987	down	SUMO2	small ubiquitin-like modifier 2 [Source:NCBI gene;Acc:770125]	Genetic Information Processing	Translation	ko03013//RNA transport	K12160	GO:0005634//nucleus	GO:0005515//protein binding;GO:0031386//protein tag;GO:0044389//ubiquitin-like protein ligase binding	GO:0016925//protein sumoylation
6	ENSGALG00000035317	7.92006	3.73719	653	77	0.609	0.299	-1.08356	1.14e-06	0.0253782	down	ID3	inhibitor of DNA binding 3, HLH protein [Source:NCBI gene;Acc:395281]	Environmental Information Processing	Signal transduction	ko04350//TGF-beta signaling pathway	K17694	GO:0005634//nucleus;GO:0005737//cytoplasm	GO:0001085//RNA polymerase II transcription factor binding;GO:0003700//DNA-binding transcription factor activity;GO:0008134//transcription factor binding;GO:0046983//protein dimerization activity	GO:0007623//circadian rhythm;GO:0010628//positive regulation of gene expression;GO:0030182//neuron differentiation;GO:0043392//negative regulation of DNA binding;GO:0045665//negative regulation of neuron differentiation;GO:0045892//negative regulation of transcription, DNA-templated;GO:0051726//regulation of cell cycle
6	ENSGALG00000014121	3.02052	1.39845	653	77	0.374	0.143	-1.11097	2.18e-05	0.483219	down	COX5A	cytochrome c oxidase subunit 5A [Source:NCBI gene;Acc:769735]	Metabolism;Metabolism;Organismal Systems	Global and overview maps;Energy metabolism;Circulatory system	ko01100//Metabolic pathways;ko00190//Oxidative phosphorylation;ko04260//Cardiac muscle contraction	K02264;K02264;K02264	GO:0005739//mitochondrion;GO:0005743//mitochondrial inner membrane;GO:0005751//mitochondrial respiratory chain complex IV	GO:0004129//cytochrome-c oxidase activity	GO:0006123//mitochondrial electron transport, cytochrome c to oxygen;GO:1902600//proton transmembrane transport
6	ENSGALG00000016067	2.31422	1.06973	653	77	0.288	0.104	-1.11328	0.000146775	1	down	HMGN1	high mobility group nucleosome binding domain 1 [Source:NCBI gene;Acc:395999]	Human Diseases	Infectious diseases	ko05168//Herpes simplex infection	K11299	GO:0000785//chromatin;GO:0005634//nucleus	GO:0003677//DNA binding;GO:0003682//chromatin binding;GO:0031492//nucleosomal DNA binding	GO:0000720//pyrimidine dimer repair by nucleotide-excision repair;GO:0006283//transcription-coupled nucleotide-excision repair;GO:0006325//chromatin organization;GO:0006357//regulation of transcription by RNA polymerase II;GO:0010224//response to UV-B;GO:0010225//response to UV-C;GO:0040034//regulation of development, heterochronic;GO:0048597//post-embryonic camera-type eye morphogenesis;GO:00506…
6	ENSGALG00000005094	2.035	0.922584	653	77	0.27	0.065	-1.14128	7.8e-07	0.0172835	down	GRAP	GRB2 related adaptor protein [Source:NCBI gene;Acc:416523]	-	-	-	-	-	GO:0005515//protein binding	-
6	ENSGALG00000015751	2.10403	0.950783	653	77	0.279	0.078	-1.14596	5.11e-06	0.11325	down	ATP5PF	ATP synthase peripheral stalk subunit F6 [Source:NCBI gene;Acc:418477]	Metabolism;Metabolism	Global and overview maps;Energy metabolism	ko01100//Metabolic pathways;ko00190//Oxidative phosphorylation	K02131;K02131	GO:0000276//mitochondrial proton-transporting ATP synthase complex, coupling factor F(o);GO:0005739//mitochondrion;GO:0005743//mitochondrial inner membrane;GO:0005753//mitochondrial proton-transporting ATP synthase complex;GO:0016020//membrane	GO:0015078//proton transmembrane transporter activity;GO:0016887//ATPase activity	GO:0006811//ion transport;GO:0015986//ATP synthesis coupled proton transport
6	ENSGALG00000015372	3.66432	1.64814	653	77	0.433	0.156	-1.15271	5.88e-07	0.0130432	down	ATP5ME	ATP synthase membrane subunit e [Source:NCBI gene;Acc:769146]	Metabolism;Metabolism	Global and overview maps;Energy metabolism	ko01100//Metabolic pathways;ko00190//Oxidative phosphorylation	K02129;K02129	GO:0000276//mitochondrial proton-transporting ATP synthase complex, coupling factor F(o);GO:0000790//nuclear chromatin;GO:0005739//mitochondrion;GO:0005753//mitochondrial proton-transporting ATP synthase complex;GO:0032993//protein-DNA complex	GO:0015078//proton transmembrane transporter activity;GO:0016887//ATPase activity;GO:0031490//chromatin DNA binding;GO:0033142//progesterone receptor binding	GO:0015986//ATP synthesis coupled proton transport
6	ENSGALG00000038951	2.97507	1.30922	653	77	0.329	0.104	-1.18421	7.83e-06	0.173666	down	RASSF1	Ras association domain family member 1 [Source:NCBI gene;Acc:101750777]	-	-	-	-	GO:0005634//nucleus;GO:0015630//microtubule cytoskeleton	GO:0046872//metal ion binding	GO:0007050//cell cycle arrest;GO:0007165//signal transduction;GO:0007265//Ras protein signal transduction;GO:0035556//intracellular signal transduction;GO:0070507//regulation of microtubule cytoskeleton organization
6	ENSGALG00000053706	1.97641	0.86924	653	77	0.265	0.091	-1.18505	0.00019032	1	down	ATP5MPL	ATP synthase membrane subunit 6.8PL [Source:NCBI gene;Acc:772187]	-	-	-	-	GO:0005739//mitochondrion;GO:0016020//membrane;GO:0016021//integral component of membrane	-	-
6	ENSGALG00000028872	56.1846	24.6664	653	77	0.997	0.935	-1.18763	2.93e-36	6.5e-32	down	TPT1	tumor protein, translationally-controlled 1 [Source:NCBI gene;Acc:396363]	-	-	-	-	GO:0000922//spindle pole;GO:0005615//extracellular space;GO:0005654//nucleoplasm;GO:0005737//cytoplasm;GO:0005771//multivesicular body;GO:0005829//cytosol;GO:0005881//cytoplasmic microtubule	GO:0005509//calcium ion binding;GO:0008134//transcription factor binding	GO:0019827//stem cell population maintenance;GO:2000384//negative regulation of ectoderm development
6	ENSGALG00000029343	3.72381	1.60403	653	77	0.44	0.156	-1.21508	5.82e-07	0.0128961	down	EIF3K	transglutaminase 2 [Source:NCBI gene;Acc:396432]	-	-	-	-	GO:0005634//nucleus;GO:0005737//cytoplasm;GO:0005829//cytosol;GO:0005852//eukaryotic translation initiation factor 3 complex;GO:0016282//eukaryotic 43S preinitiation complex;GO:0033290//eukaryotic 48S preinitiation complex	GO:0003723//RNA binding;GO:0003743//translation initiation factor activity;GO:0043022//ribosome binding	GO:0001732//formation of cytoplasmic translation initiation complex;GO:0002183//cytoplasmic translational initiation;GO:0006412//translation;GO:0006413//translational initiation;GO:0006446//regulation of translational initiation
6	ENSGALG00000002771	3.80344	1.63125	653	77	0.41	0.169	-1.22132	6.81e-05	1	down	CRIP1	cysteine rich protein 1 [Source:NCBI gene;Acc:101747696]	-	-	-	-	GO:0005737//cytoplasm	GO:0003680//AT DNA binding;GO:0008270//zinc ion binding;GO:0008301//DNA binding, bending;GO:0042277//peptide binding;GO:0046872//metal ion binding	GO:0008630//intrinsic apoptotic signaling pathway in response to DNA damage;GO:0010043//response to zinc ion;GO:0071236//cellular response to antibiotic;GO:0071493//cellular response to UV-B
6	ENSGALG00000047410	3.69794	1.57988	653	77	0.424	0.156	-1.22691	2.61e-06	0.0578895	down	-	-	-	-	-	-	-	-	-
6	ENSGALG00000005326	6.69167	2.84548	653	77	0.629	0.234	-1.2337	6.64e-11	1.47e-06	down	EIF3F	eukaryotic translation initiation factor 3 subunit F [Source:NCBI gene;Acc:423748]	Genetic Information Processing	Translation	ko03013//RNA transport	K03249	GO:0005737//cytoplasm;GO:0005852//eukaryotic translation initiation factor 3 complex;GO:0016282//eukaryotic 43S preinitiation complex;GO:0033290//eukaryotic 48S preinitiation complex;GO:0071541//eukaryotic translation initiation factor 3 complex, eIF3m	GO:0003743//translation initiation factor activity;GO:0004843//thiol-dependent ubiquitin-specific protease activity;GO:0005515//protein binding;GO:0031369//translation initiation factor binding	GO:0001732//formation of cytoplasmic translation initiation complex;GO:0002183//cytoplasmic translational initiation;GO:0006412//translation;GO:0006413//translational initiation;GO:0016579//protein deubiquitination;GO:0075522//IRES-dependent viral translational initiation
6	ENSGALG00000031368	4.24805	1.80633	653	77	0.481	0.195	-1.23374	2.62e-06	0.0581714	down	PHF12	PHD finger protein 12 [Source:NCBI gene;Acc:417580]	-	-	-	-	GO:0005634//nucleus;GO:0005654//nucleoplasm;GO:0016580//Sin3 complex;GO:0017053//transcriptional repressor complex;GO:0070822//Sin3-type complex	GO:0001222//transcription corepressor binding;GO:0003714//transcription corepressor activity;GO:0005515//protein binding;GO:0035091//phosphatidylinositol binding;GO:0046872//metal ion binding	GO:0000122//negative regulation of transcription by RNA polymerase II;GO:0045892//negative regulation of transcription, DNA-templated
6	ENSGALG00000012034	3.80488	1.61622	653	77	0.43	0.182	-1.23523	4.99e-05	1	down	ADSL	adenylosuccinate lyase [Source:NCBI gene;Acc:396540]	Metabolism;Metabolism;Metabolism	Global and overview maps;Nucleotide metabolism;Amino acid metabolism	ko01100//Metabolic pathways;ko00230//Purine metabolism;ko00250//Alanine, aspartate and glutamate metabolism	K01756;K01756;K01756	GO:0005829//cytosol	GO:0003824//catalytic activity;GO:0004018//N6-(1,2-dicarboxyethyl)AMP AMP-lyase (fumarate-forming) activity;GO:0016829//lyase activity;GO:0070626//(S)-2-(5-amino-1-(5-phospho-D-ribosyl)imidazole-4-carboxamido)succinate AMP-lyase (fumarate-forming) activity	GO:0006164//purine nucleotide biosynthetic process;GO:0006167//AMP biosynthetic process;GO:0006189//'de novo' IMP biosynthetic process;GO:0009152//purine ribonucleotide biosynthetic process;GO:0044208//'de novo' AMP biosynthetic process;GO:0051262//protein tetramerization
6	ENSGALG00000008590	25.9736	10.9312	653	77	0.965	0.688	-1.2486	1.1e-19	2.44e-15	down	EEF1B2	eukaryotic translation elongation factor 1 beta 2 [Source:NCBI gene;Acc:395723]	-	-	-	-	GO:0005737//cytoplasm;GO:0005783//endoplasmic reticulum;GO:0005853//eukaryotic translation elongation factor 1 complex	GO:0003746//translation elongation factor activity	GO:0006412//translation;GO:0006414//translational elongation
6	ENSGALG00000049751	8.01934	3.35524	653	77	0.665	0.234	-1.25707	7e-13	1.55e-08	down	-	histone cluster 1, H2bf [Source:NCBI gene;Acc:769973]	-	-	-	-	GO:0000786//nucleosome	GO:0003677//DNA binding;GO:0046982//protein heterodimerization activity	-
6	ENSGALG00000038635	4.10801	1.7055	653	77	0.45	0.195	-1.26825	4.17e-05	0.924298	down	-	myosin light chain 12B [Source:NCBI gene;Acc:770011]	Cellular Processes;Cellular Processes;Cellular Processes	Cell motility;Cellular community - eukaryotes;Cellular community - eukaryotes	ko04810//Regulation of actin cytoskeleton;ko04510//Focal adhesion;ko04530//Tight junction	K12757;K12757;K12757	-	GO:0005509//calcium ion binding	-
6	ENSGALG00000003570	2.71557	1.09281	653	77	0.325	0.104	-1.31321	2.65e-05	0.588361	down	PURH	5-aminoimidazole-4-carboxamide ribonucleotide formyltransferase/IMP cyclohydrolase [Source:NCBI gene;Acc:396091]	Metabolism;Metabolism;Metabolism	Global and overview maps;Nucleotide metabolism;Metabolism of cofactors and vitamins	ko01100//Metabolic pathways;ko00230//Purine metabolism;ko00670//One carbon pool by folate	K00602;K00602;K00602	GO:0005829//cytosol;GO:0005886//plasma membrane	GO:0003824//catalytic activity;GO:0003937//IMP cyclohydrolase activity;GO:0004643//phosphoribosylaminoimidazolecarboxamide formyltransferase activity;GO:0016787//hydrolase activity;GO:0042803//protein homodimerization activity	GO:0006164//purine nucleotide biosynthetic process;GO:0098761//cellular response to interleukin-7
6	ENSGALG00000030120	37.2805	14.8807	653	77	0.983	0.779	-1.32497	1.57e-27	3.49e-23	down	ITGB1BP3	integrin beta 1 binding protein 3 [Source:NCBI gene;Acc:415448]	Metabolism;Metabolism	Global and overview maps;Metabolism of cofactors and vitamins	ko01100//Metabolic pathways;ko00760//Nicotinate and nicotinamide metabolism	K10524;K10524	-	GO:0016301//kinase activity	GO:0016310//phosphorylation
6	ENSGALG00000028204	1.89198	0.749197	653	77	0.256	0.065	-1.33648	2.26e-06	0.0501066	down	GPX1	glutathione peroxidase 1 [Source:NCBI gene;Acc:100857115]	Metabolism;Metabolism	Lipid metabolism;Metabolism of other amino acids	ko00590//Arachidonic acid metabolism;ko00480//Glutathione metabolism	K00432;K00432	GO:0005737//cytoplasm;GO:0005739//mitochondrion;GO:0005829//cytosol;GO:0097413//Lewy body	GO:0004601//peroxidase activity;GO:0004602//glutathione peroxidase activity;GO:0017124//SH3 domain binding	GO:0000302//response to reactive oxygen species;GO:0001659//temperature homeostasis;GO:0001885//endothelial cell development;GO:0002862//negative regulation of inflammatory response to antigenic stimulus;GO:0006629//lipid metabolic process;GO:0006641//triglyceride metabolic process;GO:0006749//glutathione metabolic process;GO:0006915//apoptotic process;GO:0006979//response to oxidative stress;GO:…
6	ENSGALG00000042008	2.26919	0.891025	653	77	0.299	0.091	-1.34864	1.61e-05	0.357493	down	GSTM3	glutathione S-transferase 2-like [Source:NCBI gene;Acc:107050492]	Metabolism;Metabolism;Metabolism;Metabolism	Xenobiotics biodegradation and metabolism;Metabolism of other amino acids;Xenobiotics biodegradation and metabolism;Xenobiotics biodegradation and metabolism	ko00983//Drug metabolism - other enzymes;ko00480//Glutathione metabolism;ko00980//Metabolism of xenobiotics by cytochrome P450;ko00982//Drug metabolism - cytochrome P450	K00799;K00799;K00799;K00799	GO:0005737//cytoplasm;GO:0005829//cytosol;GO:0035686//sperm fibrous sheath;GO:0045171//intercellular bridge	GO:0004364//glutathione transferase activity;GO:0005515//protein binding;GO:0016740//transferase activity;GO:0019899//enzyme binding;GO:0042802//identical protein binding;GO:0042803//protein homodimerization activity;GO:0043295//glutathione binding	GO:0006749//glutathione metabolic process;GO:0018916//nitrobenzene metabolic process;GO:0042178//xenobiotic catabolic process;GO:0043627//response to estrogen;GO:0070458//cellular detoxification of nitrogen compound
6	ENSGALG00000042148	3.17712	1.24357	653	77	0.378	0.13	-1.35323	1.08e-05	0.239007	down	FKBP51	FK506 binding protein 5 [Source:NCBI gene;Acc:421186]	-	-	-	-	GO:0005654//nucleoplasm;GO:0005737//cytoplasm	GO:0003755//peptidyl-prolyl cis-trans isomerase activity;GO:0005515//protein binding;GO:0005528//FK506 binding;GO:0016853//isomerase activity;GO:0031072//heat shock protein binding	GO:0000413//protein peptidyl-prolyl isomerization;GO:0009617//response to bacterium;GO:0061077//chaperone-mediated protein folding
6	ENSGALG00000008542	8.66348	3.36964	653	77	0.669	0.26	-1.36235	3.46e-11	7.67e-07	down	ADD3	adducin 3 (gamma) [Source:NCBI gene;Acc:373892]	-	-	-	-	GO:0000794//condensed nuclear chromosome;GO:0005654//nucleoplasm;GO:0005737//cytoplasm;GO:0005856//cytoskeleton;GO:0005886//plasma membrane;GO:0005903//brush border;GO:0005911//cell-cell junction;GO:0005938//cell cortex;GO:0014069//postsynaptic density;GO:0016020//membrane;GO:0044853//plasma membrane raft	GO:0005198//structural molecule activity;GO:0030507//spectrin binding;GO:0051015//actin filament binding	GO:0051016//barbed-end actin filament capping;GO:0051017//actin filament bundle assembly
6	ENSGALG00000007863	4.9771	1.93248	653	77	0.556	0.195	-1.36485	1.78e-09	3.95e-05	down	COX7B	cytochrome c oxidase subunit 7B [Source:NCBI gene;Acc:771947]	Metabolism;Metabolism;Organismal Systems	Global and overview maps;Energy metabolism;Circulatory system	ko01100//Metabolic pathways;ko00190//Oxidative phosphorylation;ko04260//Cardiac muscle contraction	K02271;K02271;K02271	GO:0005746//mitochondrial respiratory chain;GO:0016020//membrane;GO:0016021//integral component of membrane;GO:0045277//respiratory chain complex IV	GO:0004129//cytochrome-c oxidase activity	GO:0022900//electron transport chain;GO:1902600//proton transmembrane transport
6	ENSGALG00000014526	3.6641	1.37768	653	77	0.401	0.143	-1.41122	1.02e-05	0.227067	down	TPI1	triosephosphate isomerase 1 [Source:NCBI gene;Acc:396435]	Metabolism;Metabolism;Metabolism;Metabolism;Metabolism;Metabolism	Global and overview maps;Global and overview maps;Carbohydrate metabolism;Global and overview maps;Carbohydrate metabolism;Carbohydrate metabolism	ko01100//Metabolic pathways;ko01200//Carbon metabolism;ko00562//Inositol phosphate metabolism;ko01230//Biosynthesis of amino acids;ko00010//Glycolysis / Gluconeogenesis;ko00051//Fructose and mannose metabolism	K01803;K01803;K01803;K01803;K01803;K01803	GO:0005737//cytoplasm;GO:0005829//cytosol	GO:0003824//catalytic activity;GO:0004807//triose-phosphate isomerase activity;GO:0008929//methylglyoxal synthase activity;GO:0016829//lyase activity;GO:0016853//isomerase activity;GO:0031625//ubiquitin protein ligase binding;GO:0042803//protein homodimerization activity	GO:0006006//glucose metabolic process;GO:0006094//gluconeogenesis;GO:0006096//glycolytic process;GO:0007275//multicellular organism development;GO:0019242//methylglyoxal biosynthetic process;GO:0019563//glycerol catabolic process;GO:0019682//glyceraldehyde-3-phosphate metabolic process;GO:0046166//glyceraldehyde-3-phosphate biosynthetic process
6	ENSGALG00000012357	9.76654	3.65751	653	77	0.698	0.286	-1.41699	2.18e-11	4.84e-07	down	CXCR4	C-X-C motif chemokine receptor 4 [Source:NCBI gene;Acc:395324]	Cellular Processes;Environmental Information Processing;Cellular Processes;Environmental Information Processing;Organismal Systems	Transport and catabolism;Signaling molecules and interaction;Cell motility;Signal transduction;Immune system	ko04144//Endocytosis;ko04060//Cytokine-cytokine receptor interaction;ko04810//Regulation of actin cytoskeleton;ko04020//Calcium signaling pathway;ko04672//Intestinal immune network for IgA production	K04189;K04189;K04189;K04189;K04189	GO:0005764//lysosome;GO:0005769//early endosome;GO:0005770//late endosome;GO:0005886//plasma membrane;GO:0009897//external side of plasma membrane;GO:0009986//cell surface;GO:0016020//membrane;GO:0016021//integral component of membrane;GO:0031252//cell leading edge;GO:0031410//cytoplasmic vesicle;GO:0032991//protein-containing complex	GO:0003779//actin binding;GO:0004930//G protein-coupled receptor activity;GO:0004950//chemokine receptor activity;GO:0016493//C-C chemokine receptor activity;GO:0019955//cytokine binding;GO:0019956//chemokine binding;GO:0019957//C-C chemokine binding;GO:0031625//ubiquitin protein ligase binding;GO:0032027//myosin light chain binding;GO:0038147//C-X-C motif chemokine 12 receptor activity;GO:004313…	GO:0001666//response to hypoxia;GO:0006935//chemotaxis;GO:0006955//immune response;GO:0007154//cell communication;GO:0007165//signal transduction;GO:0007186//G protein-coupled receptor signaling pathway;GO:0007204//positive regulation of cytosolic calcium ion concentration;GO:0007420//brain development;GO:0014812//muscle cell migration;GO:0019722//calcium-mediated signaling;GO:0022008//neurogenes…
6	ENSGALG00000027571	7.92152	2.91402	653	77	0.668	0.273	-1.44276	2.15e-10	4.76e-06	down	-	histone cluster 1, H2B-VII-like 2 [Source:NCBI gene;Acc:770188]	-	-	-	-	GO:0000786//nucleosome;GO:0005634//nucleus;GO:0005694//chromosome	GO:0003677//DNA binding;GO:0046982//protein heterodimerization activity	GO:0006334//nucleosome assembly;GO:0042742//defense response to bacterium
6	ENSGALG00000035996	2.96622	1.05564	653	77	0.361	0.104	-1.49051	1.22e-06	0.0269637	down	COX6C	cytochrome c oxidase subunit 6C [Source:NCBI gene;Acc:420243]	Metabolism;Metabolism;Organismal Systems	Global and overview maps;Energy metabolism;Circulatory system	ko01100//Metabolic pathways;ko00190//Oxidative phosphorylation;ko04260//Cardiac muscle contraction	K02268;K02268;K02268	-	GO:0004129//cytochrome-c oxidase activity	GO:0022900//electron transport chain;GO:1902600//proton transmembrane transport
6	ENSGALG00000023294	14.3959	4.96561	653	77	0.855	0.403	-1.53562	2.12e-17	4.71e-13	down	RPLP0	ribosomal protein lateral stalk subunit P0 [Source:NCBI gene;Acc:395835]	Genetic Information Processing	Translation	ko03010//Ribosome	K02941	GO:0005622//intracellular;GO:0005634//nucleus;GO:0005737//cytoplasm;GO:0005783//endoplasmic reticulum;GO:0005829//cytosol;GO:0005840//ribosome;GO:0014069//postsynaptic density;GO:0022625//cytosolic large ribosomal subunit;GO:0030425//dendrite;GO:0036464//cytoplasmic ribonucleoprotein granule;GO:0098794//postsynapse;GO:1990904//ribonucleoprotein complex	GO:0003735//structural constituent of ribosome;GO:0070180//large ribosomal subunit rRNA binding	GO:0000027//ribosomal large subunit assembly;GO:0002181//cytoplasmic translation;GO:0042254//ribosome biogenesis;GO:0071353//cellular response to interleukin-4
6	ENSGALG00000027963	5.29074	1.78168	653	77	0.539	0.169	-1.57023	8.39e-10	1.86e-05	down	COX7C	cytochrome c oxidase subunit 7C [Source:NCBI gene;Acc:431629]	Metabolism;Metabolism;Organismal Systems	Global and overview maps;Energy metabolism;Circulatory system	ko01100//Metabolic pathways;ko00190//Oxidative phosphorylation;ko04260//Cardiac muscle contraction	K02272;K02272;K02272	GO:0005739//mitochondrion;GO:0016020//membrane;GO:0016021//integral component of membrane	GO:0004129//cytochrome-c oxidase activity	GO:0006123//mitochondrial electron transport, cytochrome c to oxygen;GO:1902600//proton transmembrane transport
6	ENSGALG00000011738	1.99285	0.669669	653	77	0.266	0.078	-1.57331	0.000191638	1	down	ARHGDIB	Rho GDP dissociation inhibitor beta [Source:NCBI gene;Acc:417941]	-	-	-	-	GO:0005737//cytoplasm;GO:0005829//cytosol;GO:0016020//membrane	GO:0003924//GTPase activity;GO:0005094//Rho GDP-dissociation inhibitor activity;GO:0048365//Rac GTPase binding	GO:0007266//Rho protein signal transduction;GO:0035023//regulation of Rho protein signal transduction;GO:0050790//regulation of catalytic activity;GO:1901164//negative regulation of trophoblast cell migration;GO:2000249//regulation of actin cytoskeleton reorganization
6	ENSGALG00000037167	4.77641	1.56636	653	77	0.455	0.104	-1.60851	3.44e-10	7.62e-06	down	HIST1H103	histone cluster 1, H1.03 [Source:NCBI gene;Acc:100858354]	-	-	-	-	GO:0000786//nucleosome;GO:0005634//nucleus;GO:0005694//chromosome	GO:0003677//DNA binding;GO:0003690//double-stranded DNA binding;GO:0005515//protein binding;GO:0031492//nucleosomal DNA binding	GO:0006334//nucleosome assembly;GO:0006355//regulation of transcription, DNA-templated;GO:0016584//nucleosome positioning;GO:0030261//chromosome condensation;GO:0031936//negative regulation of chromatin silencing;GO:0045910//negative regulation of DNA recombination
6	ENSGALG00000009312	4.1692	1.36281	653	77	0.456	0.13	-1.61319	1.8e-08	0.000398321	down	RPL22L1	ribosomal protein L22 like 1 [Source:NCBI gene;Acc:100858296]	Genetic Information Processing	Translation	ko03010//Ribosome	K02891	GO:0005622//intracellular;GO:0005840//ribosome	GO:0003735//structural constituent of ribosome	GO:0006412//translation
6	ENSGALG00000020002	4.9367	1.58635	653	77	0.522	0.13	-1.63783	1.11e-11	2.47e-07	down	SLC22A3	solute carrier family 22 member 3 [Source:NCBI gene;Acc:421582]	-	-	-	-	GO:0016020//membrane;GO:0016021//integral component of membrane	GO:0005215//transporter activity;GO:0015101//organic cation transmembrane transporter activity;GO:0015651//quaternary ammonium group transmembrane transporter activity;GO:0022857//transmembrane transporter activity	GO:0015695//organic cation transport;GO:0015697//quaternary ammonium group transport;GO:0015844//monoamine transport;GO:0032098//regulation of appetite;GO:0051608//histamine transport;GO:0051615//histamine uptake;GO:0055085//transmembrane transport
6	ENSGALG00000045199	2.67181	0.810579	653	77	0.311	0.078	-1.72079	6.99e-06	0.155033	down	-	dispanin subfamily A member 2b-like [Source:NCBI gene;Acc:107053353]	-	-	-	-	GO:0016021//integral component of membrane	-	-
6	ENSGALG00000017380	1.87467	0.565267	653	77	0.263	0.065	-1.72963	3.3e-05	0.73199	down	UQCRH	ubiquinol-cytochrome c reductase hinge protein [Source:NCBI gene;Acc:771939]	Metabolism;Metabolism;Organismal Systems	Global and overview maps;Energy metabolism;Circulatory system	ko01100//Metabolic pathways;ko00190//Oxidative phosphorylation;ko04260//Cardiac muscle contraction	K00416;K00416;K00416	GO:0005739//mitochondrion;GO:0005743//mitochondrial inner membrane;GO:0005750//mitochondrial respiratory chain complex III;GO:0016020//membrane;GO:0070469//respiratory chain	GO:0008121//ubiquinol-cytochrome-c reductase activity	GO:0006122//mitochondrial electron transport, ubiquinol to cytochrome c;GO:0009060//aerobic respiration;GO:0055114//oxidation-reduction process
6	ENSGALG00000015713	2.24701	0.659445	653	77	0.274	0.078	-1.76868	0.000158639	1	down	FAM53A	family with sequence similarity 53 member A [Source:NCBI gene;Acc:378905]	-	-	-	-	GO:0005634//nucleus	-	GO:0006606//protein import into nucleus
6	ENSGALG00000040522	5.32657	1.51375	653	77	0.551	0.156	-1.81508	6.09e-11	1.35e-06	down	EIF3H	eukaryotic translation initiation factor 3 subunit H [Source:NCBI gene;Acc:420288]	Genetic Information Processing	Translation	ko03013//RNA transport	K03247	GO:0005737//cytoplasm;GO:0005829//cytosol;GO:0005852//eukaryotic translation initiation factor 3 complex;GO:0016282//eukaryotic 43S preinitiation complex;GO:0033290//eukaryotic 48S preinitiation complex;GO:0042788//polysomal ribosome;GO:0071541//eukaryotic translation initiation factor 3 complex, eIF3m	GO:0003743//translation initiation factor activity;GO:0005515//protein binding;GO:0008237//metallopeptidase activity	GO:0001732//formation of cytoplasmic translation initiation complex;GO:0002183//cytoplasmic translational initiation;GO:0006412//translation;GO:0006413//translational initiation;GO:0006508//proteolysis
6	ENSGALG00000051325	2.25901	0.64166	653	77	0.274	0.078	-1.81581	0.000162282	1	down	-	histone cluster 1 H3 family member a [Source:NCBI gene;Acc:768333]	-	-	-	-	GO:0000786//nucleosome;GO:0005634//nucleus;GO:0005694//chromosome	GO:0003677//DNA binding;GO:0031492//nucleosomal DNA binding;GO:0046982//protein heterodimerization activity	-
6	ENSGALG00000038636	2.14668	0.597814	653	77	0.273	0.078	-1.84434	0.00019522	1	down	LAPTM5	lysosomal protein transmembrane 5 [Source:NCBI gene;Acc:419552]	Cellular Processes	Transport and catabolism	ko04142//Lysosome	K12387	GO:0005764//lysosome;GO:0016020//membrane;GO:0016021//integral component of membrane	-	GO:1990830//cellular response to leukemia inhibitory factor
6	ENSGALG00000017447	1.84962	0.340061	653	77	0.251	0.039	-2.44336	4.65e-06	0.103118	down	OSTF1	osteoclast stimulating factor 1 [Source:NCBI gene;Acc:427258]	-	-	-	-	-	GO:0005515//protein binding	-
6	ENSGALG00000053682	2.16335	0.240291	653	77	0.276	0.026	-3.17042	6.81e-08	0.00150928	down	MHCIY	MHC-like class I Y [Source:NCBI gene;Acc:768350]	-	-	-	-	GO:0016020//membrane;GO:0016021//integral component of membrane	-	-
6	ENSGALG00000004167	4.77147	0.469779	653	77	0.479	0.052	-3.34438	1.46e-14	3.24e-10	down	-	serglycin [Source:NCBI gene;Acc:423695]	-	-	-	-	-	-	-

## Sheet: Cluster 7
Cluster	GeneID	control	ALV-J	cells.1	cells.2	pct.1	pct.2	log2FC	p_value	p_val_adjust	significance	Symbol	Description	KEGG_A_class	KEGG_B_class	Pathway	K_ID	GO Component	GO Function	GO Process
7	ENSGALG00000046729	6.71152	29.5573	472	215	0.364	0.688	2.1388	2.6e-39	5.77e-35	up	-	macrophage mannose receptor 1-like [Source:NCBI gene;Acc:107049166]	-	-	-	-	-	-	-
7	ENSGALG00000012702	6.62236	16.3298	472	215	0.6	0.767	1.30209	1.18e-31	2.6e-27	up	JARID2	jumonji and AT-rich interaction domain containing 2 [Source:NCBI gene;Acc:420839]	-	-	-	-	GO:0005634//nucleus;GO:0005739//mitochondrion;GO:0035097//histone methyltransferase complex;GO:0035098//ESC/E(Z) complex	GO:0000977//RNA polymerase II regulatory region sequence-specific DNA binding;GO:0001227//DNA-binding transcription repressor activity, RNA polymerase II-specific;GO:0003677//DNA binding;GO:0003682//chromatin binding;GO:0008134//transcription factor binding;GO:0032452//histone demethylase activity	GO:0000122//negative regulation of transcription by RNA polymerase II;GO:0001889//liver development;GO:0006338//chromatin remodeling;GO:0008285//negative regulation of cell proliferation;GO:0016577//histone demethylation;GO:0031061//negative regulation of histone methylation;GO:0034721//histone H3-K4 demethylation, trimethyl-H3-K4-specific;GO:0042127//regulation of cell proliferation;GO:0045892//…
7	ENSGALG00000013575	8.41326	36.945	472	215	0.331	0.665	2.13464	1.2e-31	2.66e-27	up	IFI6	interferon alpha inducible protein 6 [Source:NCBI gene;Acc:403120]	-	-	-	-	GO:0005739//mitochondrion;GO:0016021//integral component of membrane	-	-
7	ENSGALG00000007220	27.2712	58.1123	472	215	0.932	0.907	1.09147	1.71e-30	3.79e-26	up	FTH1	ferritin heavy chain 1 [Source:NCBI gene;Acc:395970]	Cellular Processes;Cellular Processes	Cell growth and death;Cell growth and death	ko04217//Necroptosis;ko04216//Ferroptosis	K00522;K00522	GO:0005737//cytoplasm;GO:0044754//autolysosome	GO:0004322//ferroxidase activity;GO:0005506//iron ion binding;GO:0008198//ferrous iron binding;GO:0008199//ferric iron binding;GO:0016491//oxidoreductase activity;GO:0042802//identical protein binding;GO:0046872//metal ion binding	GO:0006826//iron ion transport;GO:0006879//cellular iron ion homeostasis;GO:0006880//intracellular sequestering of iron ion;GO:0006955//immune response;GO:0008285//negative regulation of cell proliferation;GO:0048147//negative regulation of fibroblast proliferation;GO:0055114//oxidation-reduction process
7	ENSGALG00000014412	5.05949	25.6362	472	215	0.256	0.628	2.34112	2.27e-30	5.03e-26	up	CSTA	cystatin A [Source:NCBI gene;Acc:418268]	-	-	-	-	GO:0001533//cornified envelope;GO:0005615//extracellular space;GO:0005622//intracellular;GO:0005634//nucleus;GO:0005737//cytoplasm;GO:0005829//cytosol	GO:0002020//protease binding;GO:0004866//endopeptidase inhibitor activity;GO:0004869//cysteine-type endopeptidase inhibitor activity;GO:0005198//structural molecule activity;GO:0030674//protein binding, bridging	GO:0010466//negative regulation of peptidase activity;GO:0010951//negative regulation of endopeptidase activity;GO:0018149//peptide cross-linking;GO:0030216//keratinocyte differentiation;GO:0045861//negative regulation of proteolysis;GO:0098609//cell-cell adhesion
7	ENSGALG00000002655	2.00537	9.48426	472	215	0.208	0.577	2.24166	1.05e-28	2.33e-24	up	ITGAV	integrin subunit alpha V [Source:NCBI gene;Acc:396420]	Cellular Processes;Cellular Processes;Cellular Processes;Environmental Information Processing;Environmental Information Processing	Cell motility;Cellular community - eukaryotes;Transport and catabolism;Signaling molecules and interaction;Signaling molecules and interaction	ko04810//Regulation of actin cytoskeleton;ko04510//Focal adhesion;ko04145//Phagosome;ko04514//Cell adhesion molecules (CAMs);ko04512//ECM-receptor interaction	K06487;K06487;K06487;K06487;K06487	GO:0005829//cytosol;GO:0005886//plasma membrane;GO:0005925//focal adhesion;GO:0008305//integrin complex;GO:0009897//external side of plasma membrane;GO:0009986//cell surface;GO:0016020//membrane;GO:0016021//integral component of membrane;GO:0031258//lamellipodium membrane;GO:0031527//filopodium membrane;GO:0031528//microvillus membrane;GO:0032587//ruffle membrane;GO:0034683//integrin alphav-beta3…	GO:0001846//opsonin binding;GO:0001968//fibronectin binding;GO:0002020//protease binding;GO:0005080//protein kinase C binding;GO:0005178//integrin binding;GO:0005245//voltage-gated calcium channel activity;GO:0017134//fibroblast growth factor binding;GO:0019960//C-X3-C chemokine binding;GO:0031994//insulin-like growth factor I binding;GO:0038132//neuregulin binding;GO:0050840//extracellular matri…	GO:0001525//angiogenesis;GO:0001568//blood vessel development;GO:0007155//cell adhesion;GO:0007160//cell-matrix adhesion;GO:0007229//integrin-mediated signaling pathway;GO:0008284//positive regulation of cell proliferation;GO:0010745//negative regulation of macrophage derived foam cell differentiation;GO:0010888//negative regulation of lipid storage;GO:0030335//positive regulation of cell migrati…
7	ENSGALG00000006663	1.93327	8.93864	472	215	0.216	0.516	2.20901	1.13e-27	2.5e-23	up	ARHGEF12	Rho guanine nucleotide exchange factor 12 [Source:NCBI gene;Acc:419752]	Cellular Processes;Organismal Systems	Cell motility;Circulatory system	ko04810//Regulation of actin cytoskeleton;ko04270//Vascular smooth muscle contraction	K07532;K07532	GO:0005737//cytoplasm	GO:0001664//G protein-coupled receptor binding;GO:0005085//guanyl-nucleotide exchange factor activity;GO:0005089//Rho guanyl-nucleotide exchange factor activity;GO:0005096//GTPase activator activity;GO:0005515//protein binding	GO:0007186//G protein-coupled receptor signaling pathway;GO:0007266//Rho protein signal transduction;GO:0035023//regulation of Rho protein signal transduction;GO:0035556//intracellular signal transduction;GO:0043547//positive regulation of GTPase activity
7	ENSGALG00000025842	6.1743	24.9906	472	215	0.305	0.637	2.01704	1.76e-27	3.9e-23	up	BRT-1	tropomyosin 2 [Source:NCBI gene;Acc:396430]	Organismal Systems;Organismal Systems	Circulatory system;Circulatory system	ko04261//Adrenergic signaling in cardiomyocytes;ko04260//Cardiac muscle contraction	K09290;K09290	GO:0005737//cytoplasm;GO:0005856//cytoskeleton;GO:0005884//actin filament;GO:0015629//actin cytoskeleton	GO:0003779//actin binding;GO:0005515//protein binding;GO:0008092//cytoskeletal protein binding;GO:0042802//identical protein binding;GO:0042803//protein homodimerization activity;GO:0046982//protein heterodimerization activity;GO:0051015//actin filament binding	GO:0007015//actin filament organization;GO:0043462//regulation of ATPase activity
7	ENSGALG00000040426	1.98797	9.36784	472	215	0.212	0.507	2.23642	2.32e-26	5.15e-22	up	CREG1	cellular repressor of E1A stimulated genes 1 [Source:NCBI gene;Acc:768680]	-	-	-	-	GO:0005576//extracellular region;GO:0005615//extracellular space;GO:0005667//transcription factor complex	GO:0008134//transcription factor binding;GO:0048037//cofactor binding	GO:0006355//regulation of transcription, DNA-templated;GO:0040008//regulation of growth
7	ENSGALG00000008903	1.34349	8.27159	472	215	0.14	0.484	2.62217	5.29e-26	1.17e-21	up	ITPRID2	ITPR interacting domain containing 2 [Source:NCBI gene;Acc:424118]	-	-	-	-	GO:0005634//nucleus;GO:0005829//cytosol;GO:0005886//plasma membrane	GO:0003779//actin binding;GO:0005102//signaling receptor binding;GO:0051015//actin filament binding	-
7	ENSGALG00000038671	0.539373	5.45411	472	215	0.066	0.377	3.33799	1.99e-25	4.4e-21	up	-	uncharacterized LOC422090 [Source:NCBI gene;Acc:422090]	-	-	-	-	-	-	-
7	ENSGALG00000019552	0.575666	6.67705	472	215	0.066	0.372	3.53591	3.28e-25	7.28e-21	up	SERPINB10	serpin family B member 2 [Source:NCBI gene;Acc:420896]	-	-	-	-	GO:0005615//extracellular space	GO:0004867//serine-type endopeptidase inhibitor activity	GO:0010951//negative regulation of endopeptidase activity
7	ENSGALG00000002548	7.53246	19.9565	472	215	0.525	0.721	1.40567	4.43e-24	9.81e-20	up	TLN1	talin 1 [Source:NCBI gene;Acc:395194]	Cellular Processes	Cellular community - eukaryotes	ko04510//Focal adhesion	K06271	GO:0001726//ruffle;GO:0005856//cytoskeleton;GO:0005925//focal adhesion	GO:0001786//phosphatidylserine binding;GO:0003779//actin binding;GO:0005178//integrin binding;GO:0005200//structural constituent of cytoskeleton;GO:0017166//vinculin binding;GO:0030274//LIM domain binding;GO:0035091//phosphatidylinositol binding;GO:0051015//actin filament binding	GO:0007016//cytoskeletal anchoring at plasma membrane;GO:0007044//cell-substrate junction assembly;GO:0007155//cell adhesion;GO:0007229//integrin-mediated signaling pathway;GO:0030866//cortical actin cytoskeleton organization;GO:0033622//integrin activation
7	ENSGALG00000023296	1.58841	7.87435	472	215	0.153	0.484	2.30958	6.5e-24	1.44e-19	up	TAL1	TAL bHLH transcription factor 1, erythroid differentiation factor [Source:NCBI gene;Acc:396298]	-	-	-	-	GO:0000118//histone deacetylase complex;GO:0000790//nuclear chromatin;GO:0005634//nucleus;GO:0005654//nucleoplasm;GO:0005667//transcription factor complex;GO:0032991//protein-containing complex;GO:0033193//Lsd1/2 complex	GO:0000976//transcription regulatory region sequence-specific DNA binding;GO:0000978//RNA polymerase II proximal promoter sequence-specific DNA binding;GO:0000980//RNA polymerase II distal enhancer sequence-specific DNA binding;GO:0000981//DNA-binding transcription factor activity, RNA polymerase II-specific;GO:0001085//RNA polymerase II transcription factor binding;GO:0003677//DNA binding;GO:000…	GO:0000122//negative regulation of transcription by RNA polymerase II;GO:0001525//angiogenesis;GO:0006357//regulation of transcription by RNA polymerase II;GO:0006366//transcription by RNA polymerase II;GO:0007626//locomotory behavior;GO:0021527//spinal cord association neuron differentiation;GO:0030097//hemopoiesis;GO:0030099//myeloid cell differentiation;GO:0030182//neuron differentiation;GO:00…
7	ENSGALG00000007145	3.09493	9.85398	472	215	0.311	0.572	1.6708	4.54e-23	1.01e-18	up	ITGB1	integrin subunit beta 1 [Source:NCBI gene;Acc:374058]	Cellular Processes;Cellular Processes;Cellular Processes;Cellular Processes;Environmental Information Processing;Environmental Information Processing	Cell motility;Cellular community - eukaryotes;Cellular community - eukaryotes;Transport and catabolism;Signaling molecules and interaction;Signaling molecules and interaction	ko04810//Regulation of actin cytoskeleton;ko04510//Focal adhesion;ko04530//Tight junction;ko04145//Phagosome;ko04514//Cell adhesion molecules (CAMs);ko04512//ECM-receptor interaction	K05719;K05719;K05719;K05719;K05719;K05719	GO:0005623//cell;GO:0005737//cytoplasm;GO:0005886//plasma membrane;GO:0005925//focal adhesion;GO:0008305//integrin complex;GO:0009897//external side of plasma membrane;GO:0009986//cell surface;GO:0014704//intercalated disc;GO:0016020//membrane;GO:0016021//integral component of membrane;GO:0030175//filopodium;GO:0031410//cytoplasmic vesicle;GO:0031594//neuromuscular junction;GO:0032587//ruffle mem…	GO:0001968//fibronectin binding;GO:0002020//protease binding;GO:0003779//actin binding;GO:0005178//integrin binding;GO:0019960//C-X3-C chemokine binding;GO:0038023//signaling receptor activity;GO:0043236//laminin binding;GO:0044877//protein-containing complex binding;GO:0046982//protein heterodimerization activity;GO:0050839//cell adhesion molecule binding;GO:0098639//collagen binding involved in…	GO:0000082//G1/S transition of mitotic cell cycle;GO:0001708//cell fate specification;GO:0002042//cell migration involved in sprouting angiogenesis;GO:0007155//cell adhesion;GO:0007159//leukocyte cell-cell adhesion;GO:0007160//cell-matrix adhesion;GO:0007161//calcium-independent cell-matrix adhesion;GO:0007229//integrin-mediated signaling pathway;GO:0008284//positive regulation of cell proliferat…
7	ENSGALG00000006035	8.80183	18.4774	472	215	0.665	0.814	1.06989	1.3e-22	2.88e-18	up	PDE3B	phosphodiesterase 3B [Source:NCBI gene;Acc:423064]	Metabolism;Organismal Systems;Environmental Information Processing;Organismal Systems	Nucleotide metabolism;Endocrine system;Signal transduction;Endocrine system	ko00230//Purine metabolism;ko04910//Insulin signaling pathway;ko04371//Apelin signaling pathway;ko04914//Progesterone-mediated oocyte maturation	K13296;K13296;K13296;K13296	GO:0016020//membrane;GO:0016021//integral component of membrane;GO:0032045//guanyl-nucleotide exchange factor complex	GO:0004114//3',5'-cyclic-nucleotide phosphodiesterase activity;GO:0004115//3',5'-cyclic-AMP phosphodiesterase activity;GO:0008081//phosphoric diester hydrolase activity;GO:0016787//hydrolase activity;GO:0043422//protein kinase B binding;GO:0046872//metal ion binding	GO:0007162//negative regulation of cell adhesion;GO:0007165//signal transduction;GO:0016525//negative regulation of angiogenesis;GO:0043951//negative regulation of cAMP-mediated signaling;GO:0050995//negative regulation of lipid catabolic process
7	ENSGALG00000049653	5.94104	13.0591	472	215	0.528	0.679	1.13627	2.05e-22	4.54e-18	up	KMT2C	lysine methyltransferase 2C [Source:NCBI gene;Acc:420437]	Metabolism	Amino acid metabolism	ko00310//Lysine degradation	K09188	GO:0005634//nucleus;GO:0035097//histone methyltransferase complex;GO:0044666//MLL3/4 complex	GO:0005515//protein binding;GO:0042800//histone methyltransferase activity (H3-K4 specific)	-
7	ENSGALG00000003693	5.65296	14.5341	472	215	0.496	0.67	1.36236	2.38e-22	5.28e-18	up	MACF1	microtubule-actin crosslinking factor 1 [Source:NCBI gene;Acc:419671]	-	-	-	-	GO:0005737//cytoplasm;GO:0005794//Golgi apparatus;GO:0005856//cytoskeleton;GO:0005874//microtubule;GO:0005882//intermediate filament;GO:0005886//plasma membrane;GO:0015629//actin cytoskeleton;GO:0016020//membrane;GO:0032587//ruffle membrane	GO:0003779//actin binding;GO:0005198//structural molecule activity;GO:0005509//calcium ion binding;GO:0005515//protein binding;GO:0008017//microtubule binding;GO:0008092//cytoskeletal protein binding;GO:0051011//microtubule minus-end binding;GO:0051015//actin filament binding	GO:0007010//cytoskeleton organization;GO:0030334//regulation of cell migration;GO:0032886//regulation of microtubule-based process;GO:0042060//wound healing;GO:0043001//Golgi to plasma membrane protein transport;GO:0045104//intermediate filament cytoskeleton organization;GO:0045773//positive regulation of axon extension;GO:0051893//regulation of focal adhesion assembly
7	ENSGALG00000007447	4.1131	16.5314	472	215	0.227	0.567	2.00691	7.13e-22	1.58e-17	up	TUBB1	tubulin beta 1 class VI [Source:NCBI gene;Acc:396427]	Cellular Processes;Cellular Processes	Transport and catabolism;Cellular community - eukaryotes	ko04145//Phagosome;ko04540//Gap junction	K07375;K07375	GO:0005737//cytoplasm;GO:0005856//cytoskeleton;GO:0005874//microtubule	GO:0000166//nucleotide binding;GO:0003924//GTPase activity;GO:0005200//structural constituent of cytoskeleton;GO:0005525//GTP binding	GO:0000226//microtubule cytoskeleton organization;GO:0000278//mitotic cell cycle;GO:0007017//microtubule-based process;GO:0051225//spindle assembly
7	ENSGALG00000031425	3.33028	11.4946	472	215	0.254	0.586	1.78725	1.4e-21	3.11e-17	up	PMP22	peripheral myelin protein 22 [Source:NCBI gene;Acc:417327]	-	-	-	-	GO:0005886//plasma membrane;GO:0016020//membrane;GO:0016021//integral component of membrane	-	GO:0008219//cell death;GO:0032060//bleb assembly;GO:0032288//myelin assembly;GO:0042552//myelination
7	ENSGALG00000011203	4.51457	15.2007	472	215	0.314	0.572	1.75148	2.35e-21	5.2e-17	up	HPSE	heparanase [Source:NCBI gene;Acc:373981]	Metabolism;Metabolism	Global and overview maps;Glycan biosynthesis and metabolism	ko01100//Metabolic pathways;ko00531//Glycosaminoglycan degradation	K07964;K07964	GO:0005634//nucleus;GO:0005654//nucleoplasm;GO:0005764//lysosome;GO:0016020//membrane;GO:0031012//extracellular matrix;GO:0043231//intracellular membrane-bounded organelle;GO:0045121//membrane raft	GO:0016798//hydrolase activity, acting on glycosyl bonds;GO:0030305//heparanase activity;GO:0045545//syndecan binding;GO:0046983//protein dimerization activity	GO:0007160//cell-matrix adhesion;GO:0010575//positive regulation of vascular endothelial growth factor production;GO:0030194//positive regulation of blood coagulation;GO:0030200//heparan sulfate proteoglycan catabolic process;GO:0033690//positive regulation of osteoblast proliferation;GO:0042060//wound healing;GO:0051797//regulation of hair follicle development;GO:0051798//positive regulation of …
7	ENSGALG00000010649	2.4376	8.59683	472	215	0.229	0.516	1.81834	6.04e-19	1.34e-14	up	CNST	consortin, connexin sorting protein [Source:NCBI gene;Acc:421487]	-	-	-	-	GO:0005802//trans-Golgi network;GO:0005886//plasma membrane;GO:0030133//transport vesicle;GO:0032991//protein-containing complex;GO:0043231//intracellular membrane-bounded organelle	GO:0019902//phosphatase binding;GO:0071253//connexin binding	GO:0010923//negative regulation of phosphatase activity;GO:0042998//positive regulation of Golgi to plasma membrane protein transport
7	ENSGALG00000035906	4.53042	9.76677	472	215	0.47	0.595	1.10824	2.11e-18	4.68e-14	up	YTHDC1	YTH domain containing 1 [Source:NCBI gene;Acc:422656]	-	-	-	-	GO:0005654//nucleoplasm;GO:0005886//plasma membrane	GO:0003723//RNA binding	GO:0010608//posttranscriptional regulation of gene expression
7	ENSGALG00000004189	2.29771	7.34453	472	215	0.263	0.498	1.67647	4.45e-18	9.86e-14	up	MAFK	MAF bZIP transcription factor K [Source:NCBI gene;Acc:395518]	-	-	-	-	GO:0005634//nucleus;GO:0005654//nucleoplasm	GO:0000978//RNA polymerase II proximal promoter sequence-specific DNA binding;GO:0003677//DNA binding;GO:0003700//DNA-binding transcription factor activity;GO:0043565//sequence-specific DNA binding	GO:0000122//negative regulation of transcription by RNA polymerase II;GO:0006355//regulation of transcription, DNA-templated
7	ENSGALG00000000379	4.72504	16.0493	472	215	0.265	0.553	1.76411	5.64e-18	1.25e-13	up	ITGB3	integrin subunit beta 3 [Source:NCBI gene;Acc:374209]	Cellular Processes;Cellular Processes;Cellular Processes;Environmental Information Processing	Cell motility;Cellular community - eukaryotes;Transport and catabolism;Signaling molecules and interaction	ko04810//Regulation of actin cytoskeleton;ko04510//Focal adhesion;ko04145//Phagosome;ko04512//ECM-receptor interaction	K06493;K06493;K06493;K06493	GO:0005925//focal adhesion;GO:0008305//integrin complex;GO:0009897//external side of plasma membrane;GO:0009986//cell surface;GO:0016020//membrane;GO:0016021//integral component of membrane;GO:0016324//apical plasma membrane;GO:0035866//alphav-beta3 integrin-PKCalpha complex;GO:0071133//alpha9-beta1 integrin-ADAM8 complex;GO:0098978//glutamatergic synapse;GO:0099699//integral component of synapti…	GO:0001968//fibronectin binding;GO:0005080//protein kinase C binding;GO:0005178//integrin binding;GO:0019899//enzyme binding;GO:0042802//identical protein binding;GO:0070051//fibrinogen binding	GO:0001954//positive regulation of cell-matrix adhesion;GO:0007044//cell-substrate junction assembly;GO:0007155//cell adhesion;GO:0007160//cell-matrix adhesion;GO:0007229//integrin-mediated signaling pathway;GO:0010628//positive regulation of gene expression;GO:0010763//positive regulation of fibroblast migration;GO:0016477//cell migration;GO:0030334//regulation of cell migration;GO:0030335//posi…
7	ENSGALG00000040465	0.570677	3.84774	472	215	0.059	0.316	2.75326	6.96e-18	1.54e-13	up	ZEB2	zinc finger E-box binding homeobox 2 [Source:NCBI gene;Acc:424306]	-	-	-	-	GO:0000790//nuclear chromatin;GO:0005634//nucleus;GO:0005730//nucleolus;GO:0005829//cytosol	GO:0001227//DNA-binding transcription repressor activity, RNA polymerase II-specific;GO:0001228//DNA-binding transcription activator activity, RNA polymerase II-specific;GO:0003676//nucleic acid binding;GO:0003677//DNA binding;GO:0043565//sequence-specific DNA binding;GO:0070412//R-SMAD binding	GO:0000122//negative regulation of transcription by RNA polymerase II;GO:0001755//neural crest cell migration;GO:0001756//somitogenesis;GO:0001843//neural tube closure;GO:0007417//central nervous system development;GO:0021540//corpus callosum morphogenesis;GO:0021766//hippocampus development;GO:0021846//cell proliferation in forebrain;GO:0021957//corticospinal tract morphogenesis;GO:0030177//posi…
7	ENSGALG00000003717	4.31166	10.15	472	215	0.432	0.637	1.23516	1.48e-17	3.28e-13	up	MYO9B	myosin IXB [Source:NCBI gene;Acc:420135]	-	-	-	-	GO:0005737//cytoplasm;GO:0005829//cytosol;GO:0005884//actin filament;GO:0005938//cell cortex;GO:0016459//myosin complex;GO:0048471//perinuclear region of cytoplasm	GO:0000146//microfilament motor activity;GO:0000166//nucleotide binding;GO:0003774//motor activity;GO:0003779//actin binding;GO:0005096//GTPase activator activity;GO:0005515//protein binding;GO:0005516//calmodulin binding;GO:0005524//ATP binding;GO:0016887//ATPase activity;GO:0017048//Rho GTPase binding;GO:0043531//ADP binding;GO:0046872//metal ion binding;GO:0048495//Roundabout binding	GO:0007165//signal transduction;GO:0030048//actin filament-based movement;GO:0035023//regulation of Rho protein signal transduction;GO:0035385//Roundabout signaling pathway;GO:0035556//intracellular signal transduction;GO:0043547//positive regulation of GTPase activity
7	ENSGALG00000002594	2.51319	9.13213	472	215	0.203	0.502	1.86143	1.6e-17	3.55e-13	up	TFPI	tissue factor pathway inhibitor [Source:NCBI gene;Acc:423989]	-	-	-	-	GO:0005576//extracellular region;GO:0005615//extracellular space;GO:0005901//caveola;GO:0009986//cell surface	GO:0004867//serine-type endopeptidase inhibitor activity;GO:0030414//peptidase inhibitor activity	GO:0010466//negative regulation of peptidase activity;GO:0010951//negative regulation of endopeptidase activity;GO:0030195//negative regulation of blood coagulation;GO:0071383//cellular response to steroid hormone stimulus
7	ENSGALG00000031430	1.17675	7.89513	472	215	0.112	0.372	2.74615	2.51e-17	5.56e-13	up	-	selectin E [Source:NCBI gene;Acc:424402]	Environmental Information Processing;Human Diseases	Signaling molecules and interaction;Endocrine and metabolic diseases	ko04514//Cell adhesion molecules (CAMs);ko04933//AGE-RAGE signaling pathway in diabetic complications	K06494;K06494	GO:0016020//membrane;GO:0016021//integral component of membrane	-	GO:0007155//cell adhesion
7	ENSGALG00000037929	3.94518	9.66864	472	215	0.383	0.572	1.29322	2.7e-16	5.98e-12	up	BIN2	bridging integrator 2 [Source:NCBI gene;Acc:777552]	-	-	-	-	GO:0001891//phagocytic cup;GO:0002102//podosome;GO:0005737//cytoplasm;GO:0005886//plasma membrane	GO:0005515//protein binding;GO:0005543//phospholipid binding	GO:0006911//phagocytosis, engulfment;GO:0071800//podosome assembly;GO:0097320//plasma membrane tubulation
7	ENSGALG00000028627	1.58118	6.24529	472	215	0.144	0.419	1.98177	2.98e-16	6.6e-12	up	TIMP3	TIMP metallopeptidase inhibitor 3 [Source:NCBI gene;Acc:396483]	-	-	-	-	GO:0005576//extracellular region;GO:0005604//basement membrane;GO:0005615//extracellular space;GO:0031012//extracellular matrix	GO:0002020//protease binding;GO:0004857//enzyme inhibitor activity;GO:0005515//protein binding;GO:0008191//metalloendopeptidase inhibitor activity;GO:0008270//zinc ion binding;GO:0030414//peptidase inhibitor activity;GO:0046872//metal ion binding	GO:0009725//response to hormone;GO:0010033//response to organic substance;GO:0010466//negative regulation of peptidase activity;GO:0010951//negative regulation of endopeptidase activity;GO:0034097//response to cytokine;GO:0051045//negative regulation of membrane protein ectodomain proteolysis;GO:0070373//negative regulation of ERK1 and ERK2 cascade;GO:0071310//cellular response to organic substan…
7	ENSGALG00000008206	2.57287	7.58544	472	215	0.254	0.484	1.55985	5.28e-16	1.17e-11	up	TESC	tescalcin [Source:NCBI gene;Acc:771113]	-	-	-	-	GO:0005634//nucleus;GO:0005737//cytoplasm;GO:0005829//cytosol;GO:0005886//plasma membrane;GO:0030027//lamellipodium	GO:0005509//calcium ion binding	GO:0008285//negative regulation of cell proliferation;GO:0010628//positive regulation of gene expression;GO:0030854//positive regulation of granulocyte differentiation;GO:0032417//positive regulation of sodium:proton antiporter activity;GO:0033628//regulation of cell adhesion mediated by integrin;GO:0045654//positive regulation of megakaryocyte differentiation;GO:0045893//positive regulation of t…
7	ENSGALG00000008756	3.52655	11.0833	472	215	0.271	0.526	1.65206	6.28e-16	1.39e-11	up	PLEK	pleckstrin [Source:NCBI gene;Acc:395669]	-	-	-	-	GO:0005737//cytoplasm;GO:0005886//plasma membrane;GO:0032587//ruffle membrane	GO:0005080//protein kinase C binding;GO:0042803//protein homodimerization activity;GO:0043325//phosphatidylinositol-3,4-bisphosphate binding	GO:0002244//hematopoietic progenitor cell differentiation;GO:0002576//platelet degranulation;GO:0006904//vesicle docking involved in exocytosis;GO:0007229//integrin-mediated signaling pathway;GO:0010572//positive regulation of platelet activation;GO:0010920//negative regulation of inositol phosphate biosynthetic process;GO:0010925//positive regulation of inositol-polyphosphate 5-phosphatase activ…
7	ENSGALG00000005079	0.463486	3.0637	472	215	0.066	0.274	2.72468	9.31e-16	2.06e-11	up	VCL	vinculin [Source:NCBI gene;Acc:396422]	Cellular Processes;Cellular Processes;Cellular Processes	Cell motility;Cellular community - eukaryotes;Cellular community - eukaryotes	ko04810//Regulation of actin cytoskeleton;ko04510//Focal adhesion;ko04520//Adherens junction	K05700;K05700;K05700	GO:0001725//stress fiber;GO:0002102//podosome;GO:0005623//cell;GO:0005737//cytoplasm;GO:0005743//mitochondrial inner membrane;GO:0005856//cytoskeleton;GO:0005886//plasma membrane;GO:0005903//brush border;GO:0005911//cell-cell junction;GO:0005912//adherens junction;GO:0005913//cell-cell adherens junction;GO:0005915//zonula adherens;GO:0005916//fascia adherens;GO:0005925//focal adhesion;GO:0005927/…	GO:0002162//dystroglycan binding;GO:0003779//actin binding;GO:0005198//structural molecule activity;GO:0005515//protein binding;GO:0008013//beta-catenin binding;GO:0017166//vinculin binding;GO:0031625//ubiquitin protein ligase binding;GO:0042803//protein homodimerization activity;GO:0045294//alpha-catenin binding;GO:0045296//cadherin binding;GO:0051015//actin filament binding;GO:0051371//muscle a…	GO:0002009//morphogenesis of an epithelium;GO:0007155//cell adhesion;GO:0030032//lamellipodium assembly;GO:0030334//regulation of cell migration;GO:0034333//adherens junction assembly;GO:0034394//protein localization to cell surface;GO:0043297//apical junction assembly;GO:0048675//axon extension;GO:0090136//epithelial cell-cell adhesion
7	ENSGALG00000005512	1.42621	5.70662	472	215	0.182	0.372	2.00044	1.24e-15	2.76e-11	up	KIAA1671	KIAA1671 [Source:NCBI gene;Acc:768701]	-	-	-	-	-	-	-
7	ENSGALG00000026077	1.89699	5.51166	472	215	0.246	0.395	1.53877	2.32e-15	5.15e-11	up	ALDOC	aldolase, fructose-bisphosphate C [Source:NCBI gene;Acc:395492]	Metabolism;Metabolism;Metabolism;Metabolism;Metabolism;Metabolism	Global and overview maps;Global and overview maps;Global and overview maps;Carbohydrate metabolism;Carbohydrate metabolism;Carbohydrate metabolism	ko01100//Metabolic pathways;ko01200//Carbon metabolism;ko01230//Biosynthesis of amino acids;ko00010//Glycolysis / Gluconeogenesis;ko00051//Fructose and mannose metabolism;ko00030//Pentose phosphate pathway	K01623;K01623;K01623;K01623;K01623;K01623	-	GO:0003824//catalytic activity;GO:0004332//fructose-bisphosphate aldolase activity;GO:0008092//cytoskeletal protein binding;GO:0016829//lyase activity	GO:0006096//glycolytic process;GO:0030388//fructose 1,6-bisphosphate metabolic process;GO:0030855//epithelial cell differentiation
7	ENSGALG00000006300	1.60088	5.2161	472	215	0.206	0.353	1.70411	2.78e-15	6.16e-11	up	LDHA	lactate dehydrogenase A [Source:NCBI gene;Acc:396221]	Metabolism;Metabolism;Metabolism;Metabolism;Metabolism	Global and overview maps;Carbohydrate metabolism;Amino acid metabolism;Carbohydrate metabolism;Carbohydrate metabolism	ko01100//Metabolic pathways;ko00010//Glycolysis / Gluconeogenesis;ko00270//Cysteine and methionine metabolism;ko00620//Pyruvate metabolism;ko00640//Propanoate metabolism	K00016;K00016;K00016;K00016;K00016	GO:0005737//cytoplasm	GO:0003824//catalytic activity;GO:0004459//L-lactate dehydrogenase activity;GO:0016491//oxidoreductase activity;GO:0016616//oxidoreductase activity, acting on the CH-OH group of donors, NAD or NADP as acceptor	GO:0005975//carbohydrate metabolic process;GO:0019752//carboxylic acid metabolic process;GO:0055114//oxidation-reduction process
7	ENSGALG00000005688	1.74382	6.7605	472	215	0.14	0.409	1.95488	3.07e-15	6.81e-11	up	DNASE1L1	deoxyribonuclease 1 like 1 [Source:NCBI gene;Acc:416008]	-	-	-	-	GO:0005634//nucleus;GO:0005783//endoplasmic reticulum	GO:0003677//DNA binding;GO:0004518//nuclease activity;GO:0004519//endonuclease activity;GO:0004530//deoxyribonuclease I activity;GO:0004536//deoxyribonuclease activity;GO:0016787//hydrolase activity	GO:0000737//DNA catabolic process, endonucleolytic;GO:0002283//neutrophil activation involved in immune response;GO:0002673//regulation of acute inflammatory response;GO:0006308//DNA catabolic process;GO:0006309//apoptotic DNA fragmentation;GO:0010623//programmed cell death involved in cell development;GO:0070948//regulation of neutrophil mediated cytotoxicity
7	ENSGALG00000014324	2.4689	6.55923	472	215	0.299	0.488	1.40966	3.66e-15	8.11e-11	up	SLC2A14	solute carrier family 2 member 14 [Source:NCBI gene;Acc:396517]	-	-	-	-	GO:0002080//acrosomal membrane;GO:0005615//extracellular space;GO:0005623//cell;GO:0005737//cytoplasm;GO:0005886//plasma membrane;GO:0016020//membrane;GO:0016021//integral component of membrane	GO:0005215//transporter activity;GO:0005355//glucose transmembrane transporter activity;GO:0022857//transmembrane transporter activity;GO:0033300//dehydroascorbic acid transmembrane transporter activity;GO:0055056//D-glucose transmembrane transporter activity	GO:0055085//transmembrane transport;GO:0070837//dehydroascorbic acid transport;GO:1904659//glucose transmembrane transport
7	ENSGALG00000050058	0.647294	3.89567	472	215	0.089	0.307	2.58938	4e-15	8.87e-11	up	REEP1	receptor accessory protein 1 [Source:NCBI gene;Acc:771776]	-	-	-	-	GO:0005737//cytoplasm;GO:0005783//endoplasmic reticulum;GO:0005789//endoplasmic reticulum membrane;GO:0016020//membrane;GO:0016021//integral component of membrane;GO:0071782//endoplasmic reticulum tubular network	GO:0008017//microtubule binding;GO:0031849//olfactory receptor binding	GO:0032386//regulation of intracellular transport;GO:0051205//protein insertion into membrane;GO:0071786//endoplasmic reticulum tubular network organization
7	ENSGALG00000029190	3.96244	9.2425	472	215	0.398	0.563	1.22189	4.38e-15	9.71e-11	up	MBNL1	muscleblind like splicing regulator 1 [Source:NCBI gene;Acc:425033]	-	-	-	-	GO:0005634//nucleus;GO:0005654//nucleoplasm;GO:0005737//cytoplasm;GO:0005829//cytosol;GO:0010494//cytoplasmic stress granule	GO:0003723//RNA binding;GO:0003725//double-stranded RNA binding;GO:0046872//metal ion binding	GO:0000381//regulation of alternative mRNA splicing, via spliceosome;GO:0006397//mRNA processing;GO:0008380//RNA splicing;GO:0043484//regulation of RNA splicing
7	ENSGALG00000003381	1.94097	6.57995	472	215	0.214	0.456	1.7613	8.58e-15	1.9e-10	up	HERC1	HECT and RLD domain containing E3 ubiquitin protein ligase family member 1 [Source:NCBI gene;Acc:415367]	Genetic Information Processing	Folding, sorting and degradation	ko04120//Ubiquitin mediated proteolysis	K10594	-	GO:0004842//ubiquitin-protein transferase activity;GO:0005515//protein binding;GO:0016740//transferase activity	GO:0010507//negative regulation of autophagy;GO:0016567//protein ubiquitination;GO:0021702//cerebellar Purkinje cell differentiation;GO:0031175//neuron projection development;GO:0050885//neuromuscular process controlling balance
7	ENSGALG00000038494	4.82654	10.8484	472	215	0.439	0.647	1.16842	1.04e-14	2.3e-10	up	CMIP	c-Maf inducing protein [Source:NCBI gene;Acc:425774]	-	-	-	-	GO:0005654//nucleoplasm;GO:0005829//cytosol	-	-
7	ENSGALG00000033513	4.44863	9.68261	472	215	0.443	0.586	1.12203	1.36e-14	3.02e-10	up	ELL	elongation factor for RNA polymerase II [Source:NCBI gene;Acc:420124]	-	-	-	-	GO:0008023//transcription elongation factor complex;GO:0015030//Cajal body;GO:0016607//nuclear speck;GO:0035327//transcriptionally active chromatin;GO:0035363//histone locus body	GO:0019902//phosphatase binding	GO:0006366//transcription by RNA polymerase II;GO:0006368//transcription elongation from RNA polymerase II promoter;GO:0010923//negative regulation of phosphatase activity;GO:0032968//positive regulation of transcription elongation from RNA polymerase II promoter;GO:0042795//snRNA transcription by RNA polymerase II;GO:0042796//snRNA transcription by RNA polymerase III;GO:0045945//positive regulat…
7	ENSGALG00000015177	0.384386	2.68813	472	215	0.049	0.256	2.80597	1.49e-14	3.29e-10	up	GNAQ	G protein subunit alpha q [Source:NCBI gene;Acc:427262]	Environmental Information Processing;Organismal Systems;Environmental Information Processing;Organismal Systems;Organismal Systems;Organismal Systems;Cellular Processes	Signal transduction;Circulatory system;Signal transduction;Circulatory system;Endocrine system;Endocrine system;Cellular community - eukaryotes	ko04020//Calcium signaling pathway;ko04261//Adrenergic signaling in cardiomyocytes;ko04371//Apelin signaling pathway;ko04270//Vascular smooth muscle contraction;ko04916//Melanogenesis;ko04912//GnRH signaling pathway;ko04540//Gap junction	K04634;K04634;K04634;K04634;K04634;K04634;K04634	GO:0001750//photoreceptor outer segment;GO:0005834//heterotrimeric G-protein complex;GO:0016020//membrane;GO:0097232//lamellar body membrane	GO:0000166//nucleotide binding;GO:0001664//G protein-coupled receptor binding;GO:0002046//opsin binding;GO:0003924//GTPase activity;GO:0005096//GTPase activator activity;GO:0005525//GTP binding;GO:0019001//guanyl nucleotide binding;GO:0031683//G-protein beta/gamma-subunit complex binding;GO:0031826//type 2A serotonin receptor binding	GO:0001508//action potential;GO:0006469//negative regulation of protein kinase activity;GO:0007165//signal transduction;GO:0007186//G protein-coupled receptor signaling pathway;GO:0007188//adenylate cyclase-modulating G protein-coupled receptor signaling pathway;GO:0007189//adenylate cyclase-activating G protein-coupled receptor signaling pathway;GO:0007213//G protein-coupled acetylcholine recept…
7	ENSGALG00000004859	2.06853	6.56995	472	215	0.231	0.47	1.66728	1.75e-14	3.89e-10	up	ZNFX1	zinc finger NFX1-type containing 1 [Source:NCBI gene;Acc:419218]	-	-	-	-	GO:0000775//chromosome, centromeric region;GO:0005634//nucleus;GO:0031380//nuclear RNA-directed RNA polymerase complex	GO:0003723//RNA binding	GO:0030702//chromatin silencing at centromere;GO:0031048//chromatin silencing by small RNA
7	ENSGALG00000007140	0.365744	2.63648	472	215	0.051	0.256	2.84971	1.96e-14	4.33e-10	up	NRP1	neuropilin 1 [Source:NCBI gene;Acc:395560]	-	-	-	-	GO:0005769//early endosome;GO:0005829//cytosol;GO:0005883//neurofilament;GO:0005886//plasma membrane;GO:0005925//focal adhesion;GO:0016020//membrane;GO:0016021//integral component of membrane;GO:0030424//axon;GO:0043005//neuron projection;GO:0097443//sorting endosome;GO:0098978//glutamatergic synapse;GO:0099055//integral component of postsynaptic membrane	GO:0005021//vascular endothelial growth factor-activated receptor activity;GO:0005096//GTPase activator activity;GO:0017154//semaphorin receptor activity;GO:0019838//growth factor binding;GO:0019901//protein kinase binding;GO:0038085//vascular endothelial growth factor binding;GO:0046872//metal ion binding	GO:0001525//angiogenesis;GO:0001569//branching involved in blood vessel morphogenesis;GO:0001764//neuron migration;GO:0002040//sprouting angiogenesis;GO:0002042//cell migration involved in sprouting angiogenesis;GO:0003148//outflow tract septum morphogenesis;GO:0006930//substrate-dependent cell migration, cell extension;GO:0007229//integrin-mediated signaling pathway;GO:0007275//multicellular org…
7	ENSGALG00000005330	0.574503	3.09671	472	215	0.072	0.293	2.43035	3.46e-14	7.66e-10	up	SNCAIP	synuclein alpha interacting protein [Source:NCBI gene;Acc:426796]	-	-	-	-	GO:0005654//nucleoplasm;GO:0005737//cytoplasm;GO:0036464//cytoplasmic ribonucleoprotein granule	GO:0005515//protein binding;GO:0031625//ubiquitin protein ligase binding;GO:0042802//identical protein binding	GO:0008219//cell death;GO:0042417//dopamine metabolic process;GO:0046928//regulation of neurotransmitter secretion;GO:0090083//regulation of inclusion body assembly
7	ENSGALG00000009927	3.09558	7.27529	472	215	0.337	0.47	1.2328	3.72e-14	8.25e-10	up	RAP1B	RAP1B, member of RAS oncogene family [Source:NCBI gene;Acc:417840]	Environmental Information Processing;Cellular Processes	Signal transduction;Cellular community - eukaryotes	ko04010//MAPK signaling pathway;ko04510//Focal adhesion	K07836;K07836	GO:0005737//cytoplasm;GO:0005811//lipid droplet;GO:0005829//cytosol;GO:0005886//plasma membrane;GO:0005911//cell-cell junction;GO:0016020//membrane;GO:0030054//cell junction	GO:0000166//nucleotide binding;GO:0003924//GTPase activity;GO:0005525//GTP binding;GO:0019003//GDP binding;GO:0044877//protein-containing complex binding	GO:0007165//signal transduction;GO:0007264//small GTPase mediated signal transduction;GO:0008283//cell proliferation;GO:0032486//Rap protein signal transduction;GO:0045955//negative regulation of calcium ion-dependent exocytosis;GO:0061028//establishment of endothelial barrier;GO:0070374//positive regulation of ERK1 and ERK2 cascade;GO:0071320//cellular response to cAMP;GO:1901888//regulation of …
7	ENSGALG00000008097	1.44593	4.49112	472	215	0.184	0.367	1.63508	1.54e-13	3.42e-09	up	CELF1	CUGBP Elav-like family member 1 [Source:NCBI gene;Acc:373923]	-	-	-	-	GO:0005634//nucleus;GO:0005654//nucleoplasm;GO:0005737//cytoplasm;GO:1990904//ribonucleoprotein complex	GO:0003676//nucleic acid binding;GO:0003723//RNA binding;GO:0003729//mRNA binding;GO:0031369//translation initiation factor binding	GO:0000381//regulation of alternative mRNA splicing, via spliceosome;GO:0006376//mRNA splice site selection;GO:0007286//spermatid development;GO:0040018//positive regulation of multicellular organism growth
7	ENSGALG00000021656	1.37684	4.26876	472	215	0.189	0.367	1.63246	1.59e-13	3.53e-09	up	PTPN22	protein tyrosine phosphatase, non-receptor type 22 [Source:NCBI gene;Acc:772032]	-	-	-	-	GO:0005634//nucleus;GO:0005737//cytoplasm;GO:0009898//cytoplasmic side of plasma membrane	GO:0004721//phosphoprotein phosphatase activity;GO:0004725//protein tyrosine phosphatase activity;GO:0016787//hydrolase activity;GO:0016791//phosphatase activity;GO:0017124//SH3 domain binding;GO:0019900//kinase binding	GO:0002230//positive regulation of defense response to virus by host;GO:0002685//regulation of leukocyte migration;GO:0006470//protein dephosphorylation;GO:0010628//positive regulation of gene expression;GO:0010629//negative regulation of gene expression;GO:0016311//dephosphorylation;GO:0030217//T cell differentiation;GO:0032720//negative regulation of tumor necrosis factor production;GO:0034141/…
7	ENSGALG00000052801	0.691582	3.02062	472	215	0.104	0.27	2.12687	2.13e-13	4.72e-09	up	-	-	-	-	-	-	-	-	-
7	ENSGALG00000052918	1.06294	4.41617	472	215	0.129	0.33	2.05473	3.12e-13	6.91e-09	up	-	platelet glycoprotein Ib alpha chain-like [Source:NCBI gene;Acc:101750889]	Environmental Information Processing	Signaling molecules and interaction	ko04512//ECM-receptor interaction	K06261	-	GO:0005515//protein binding	-
7	ENSGALG00000003748	1.7472	5.10682	472	215	0.214	0.381	1.54738	3.94e-13	8.74e-09	up	ANO5	anoctamin 5 [Source:NCBI gene;Acc:422973]	-	-	-	-	GO:0005886//plasma membrane;GO:0016020//membrane;GO:0016021//integral component of membrane;GO:0031982//vesicle	GO:0005229//intracellular calcium activated chloride channel activity;GO:0046983//protein dimerization activity	GO:0006821//chloride transport;GO:0034220//ion transmembrane transport
7	ENSGALG00000005422	0.727457	3.67343	472	215	0.089	0.288	2.33619	4.39e-13	9.74e-09	up	PDLIM1	PDZ and LIM domain 1 [Source:NCBI gene;Acc:428948]	-	-	-	-	GO:0005667//transcription factor complex;GO:0005856//cytoskeleton	GO:0003713//transcription coactivator activity;GO:0005515//protein binding;GO:0046872//metal ion binding	GO:0006355//regulation of transcription, DNA-templated;GO:1903508//positive regulation of nucleic acid-templated transcription
7	ENSGALG00000013605	0.679207	3.10138	472	215	0.085	0.298	2.19099	4.51e-13	9.99e-09	up	CARMIL1	capping protein regulator and myosin 1 linker 1 [Source:NCBI gene;Acc:421002]	-	-	-	-	GO:0005634//nucleus;GO:0005829//cytosol;GO:0005886//plasma membrane;GO:0016607//nuclear speck;GO:0030027//lamellipodium;GO:0031252//cell leading edge;GO:0031941//filamentous actin;GO:0044354//macropinosome	GO:0005515//protein binding;GO:0044877//protein-containing complex binding	GO:0016477//cell migration;GO:0030032//lamellipodium assembly;GO:0030335//positive regulation of cell migration;GO:0030838//positive regulation of actin filament polymerization;GO:0031529//ruffle organization;GO:0044351//macropinocytosis;GO:0046415//urate metabolic process;GO:0051496//positive regulation of stress fiber assembly;GO:0051638//barbed-end actin filament uncapping;GO:0051639//actin fi…
7	ENSGALG00000030988	0.886833	3.78499	472	215	0.106	0.321	2.09355	1.57e-12	3.47e-08	up	RBPMS2	RNA binding protein, mRNA processing factor 2 [Source:NCBI gene;Acc:395678]	-	-	-	-	GO:0005737//cytoplasm	GO:0003676//nucleic acid binding;GO:0003713//transcription coactivator activity;GO:0003723//RNA binding;GO:0003729//mRNA binding;GO:0008143//poly(A) binding;GO:0035614//snRNA stem-loop binding;GO:0042803//protein homodimerization activity	GO:0000398//mRNA splicing, via spliceosome;GO:0007275//multicellular organism development;GO:0010862//positive regulation of pathway-restricted SMAD protein phosphorylation;GO:0030514//negative regulation of BMP signaling pathway;GO:0048557//embryonic digestive tract morphogenesis;GO:0048565//digestive tract development;GO:0048661//positive regulation of smooth muscle cell proliferation;GO:005115…
7	ENSGALG00000035017	0.586071	2.99518	472	215	0.078	0.26	2.3535	2.47e-12	5.48e-08	up	-	protein tyrosine phosphatase, non-receptor type 11-like [Source:NCBI gene;Acc:419429]	Human Diseases;Organismal Systems	Infectious diseases;Endocrine system	ko05168//Herpes simplex infection;ko04920//Adipocytokine signaling pathway	K07293;K07293	GO:0005737//cytoplasm	GO:0004721//phosphoprotein phosphatase activity;GO:0004725//protein tyrosine phosphatase activity;GO:0016787//hydrolase activity;GO:0016791//phosphatase activity	GO:0006470//protein dephosphorylation;GO:0016311//dephosphorylation;GO:0035335//peptidyl-tyrosine dephosphorylation
7	ENSGALG00000025937	0.542527	2.64896	472	215	0.072	0.26	2.28766	2.93e-12	6.49e-08	up	FXYD6	FXYD domain containing ion transport regulator 6 [Source:NCBI gene;Acc:770406]	-	-	-	-	GO:0005886//plasma membrane;GO:0016020//membrane;GO:0016021//integral component of membrane;GO:0098978//glutamatergic synapse;GO:0099055//integral component of postsynaptic membrane;GO:0099056//integral component of presynaptic membrane	GO:0017080//sodium channel regulator activity;GO:0099106//ion channel regulator activity	GO:0006811//ion transport;GO:0043269//regulation of ion transport;GO:2000649//regulation of sodium ion transmembrane transporter activity
7	ENSGALG00000005022	0.566764	3.16249	472	215	0.072	0.265	2.48024	4.6e-12	1.02e-07	up	GP9	glycoprotein IX platelet [Source:HGNC Symbol;Acc:HGNC:4444]	-	-	-	-	GO:0016020//membrane;GO:0016021//integral component of membrane	-	-
7	ENSGALG00000001684	0.69123	3.02589	472	215	0.097	0.26	2.13012	9.36e-12	2.07e-07	up	SEC14L1	SEC14 like lipid binding 1 [Source:NCBI gene;Acc:417350]	-	-	-	-	GO:0005654//nucleoplasm;GO:0005737//cytoplasm;GO:0005794//Golgi apparatus;GO:0005829//cytosol	GO:0039552//RIG-I binding;GO:0098772//molecular function regulator	GO:0015871//choline transport;GO:0039536//negative regulation of RIG-I signaling pathway
7	ENSGALG00000031325	2.63317	6.37069	472	215	0.288	0.437	1.27465	1.09e-11	2.42e-07	up	TGFB1	transforming growth factor beta 1 [Source:NCBI gene;Acc:100873157]	Environmental Information Processing;Environmental Information Processing;Cellular Processes;Environmental Information Processing;Cellular Processes;Human Diseases;Environmental Information Processing;Organismal Systems	Signal transduction;Signaling molecules and interaction;Cell growth and death;Signal transduction;Cell growth and death;Endocrine and metabolic diseases;Signal transduction;Immune system	ko04010//MAPK signaling pathway;ko04060//Cytokine-cytokine receptor interaction;ko04218//Cellular senescence;ko04068//FoxO signaling pathway;ko04110//Cell cycle;ko04933//AGE-RAGE signaling pathway in diabetic complications;ko04350//TGF-beta signaling pathway;ko04672//Intestinal immune network for IgA production	K13375;K13375;K13375;K13375;K13375;K13375;K13375;K13375	GO:0005576//extracellular region;GO:0005615//extracellular space;GO:0005634//nucleus;GO:0005737//cytoplasm;GO:0005902//microvillus;GO:0009986//cell surface;GO:0031012//extracellular matrix	GO:0003823//antigen binding;GO:0005114//type II transforming growth factor beta receptor binding;GO:0005125//cytokine activity;GO:0005160//transforming growth factor beta receptor binding;GO:0008083//growth factor activity;GO:0019899//enzyme binding;GO:0034713//type I transforming growth factor beta receptor binding;GO:0034714//type III transforming growth factor beta receptor binding;GO:0042802/…	GO:0000122//negative regulation of transcription by RNA polymerase II;GO:0000165//MAPK cascade;GO:0001570//vasculogenesis;GO:0001657//ureteric bud development;GO:0001775//cell activation;GO:0001837//epithelial to mesenchymal transition;GO:0001843//neural tube closure;GO:0001933//negative regulation of protein phosphorylation;GO:0001934//positive regulation of protein phosphorylation;GO:0002028//r…
7	ENSGALG00000031642	2.66278	6.26275	472	215	0.292	0.442	1.23386	1.57e-11	3.48e-07	up	ILK	integrin linked kinase [Source:NCBI gene;Acc:374018]	Cellular Processes;Organismal Systems	Cellular community - eukaryotes;Endocrine system	ko04510//Focal adhesion;ko03320//PPAR signaling pathway	K06272;K06272	GO:0005654//nucleoplasm;GO:0005829//cytosol;GO:0005925//focal adhesion;GO:0030027//lamellipodium;GO:0030054//cell junction	GO:0004672//protein kinase activity;GO:0004674//protein serine/threonine kinase activity;GO:0005515//protein binding;GO:0005524//ATP binding;GO:0016301//kinase activity;GO:0019901//protein kinase binding	GO:0001658//branching involved in ureteric bud morphogenesis;GO:0001934//positive regulation of protein phosphorylation;GO:0003151//outflow tract morphogenesis;GO:0006468//protein phosphorylation;GO:0007229//integrin-mediated signaling pathway;GO:0008284//positive regulation of cell proliferation;GO:0009967//positive regulation of signal transduction;GO:0010761//fibroblast migration;GO:0014044//S…
7	ENSGALG00000001998	1.31308	4.0796	472	215	0.153	0.372	1.63547	2.9e-11	6.43e-07	up	R3HDM4	R3H domain containing 4 [Source:NCBI gene;Acc:770563]	-	-	-	-	-	GO:0003676//nucleic acid binding	-
7	ENSGALG00000034591	0.600677	2.45702	472	215	0.095	0.251	2.03225	3.27e-11	7.24e-07	up	-	transmembrane protein 14C [Source:NCBI gene;Acc:420851]	-	-	-	-	GO:0016020//membrane;GO:0016021//integral component of membrane	-	-
7	ENSGALG00000014071	3.05218	6.60614	472	215	0.341	0.488	1.11396	6.21e-11	1.38e-06	up	ITPR2	inositol 1,4,5-trisphosphate receptor type 2 [Source:NCBI gene;Acc:418212]	Environmental Information Processing;Cellular Processes;Organismal Systems;Cellular Processes;Environmental Information Processing;Organismal Systems;Cellular Processes;Environmental Information Processing;Organismal Systems;Cellular Processes	Signal transduction;Cell growth and death;Immune system;Cell growth and death;Signal transduction;Circulatory system;Cell growth and death;Signal transduction;Endocrine system;Cellular community - eukaryotes	ko04020//Calcium signaling pathway;ko04218//Cellular senescence;ko04621//NOD-like receptor signaling pathway;ko04210//Apoptosis;ko04371//Apelin signaling pathway;ko04270//Vascular smooth muscle contraction;ko04114//Oocyte meiosis;ko04070//Phosphatidylinositol signaling system;ko04912//GnRH signaling pathway;ko04540//Gap junction	K04959;K04959;K04959;K04959;K04959;K04959;K04959;K04959;K04959;K04959	GO:0005634//nucleus;GO:0005737//cytoplasm;GO:0005783//endoplasmic reticulum;GO:0005789//endoplasmic reticulum membrane;GO:0005886//plasma membrane;GO:0005938//cell cortex;GO:0016020//membrane;GO:0016021//integral component of membrane;GO:0016529//sarcoplasmic reticulum;GO:0030659//cytoplasmic vesicle membrane;GO:0030667//secretory granule membrane;GO:0033017//sarcoplasmic reticulum membrane;GO:00…	GO:0005216//ion channel activity;GO:0005220//inositol 1,4,5-trisphosphate-sensitive calcium-release channel activity;GO:0005262//calcium channel activity;GO:0005509//calcium ion binding;GO:0015278//calcium-release channel activity;GO:0035091//phosphatidylinositol binding;GO:0070679//inositol 1,4,5 trisphosphate binding;GO:0097110//scaffold protein binding	GO:0001666//response to hypoxia;GO:0006811//ion transport;GO:0006816//calcium ion transport;GO:0048016//inositol phosphate-mediated signaling;GO:0051209//release of sequestered calcium ion into cytosol;GO:0055085//transmembrane transport;GO:0070588//calcium ion transmembrane transport;GO:0071320//cellular response to cAMP;GO:0071361//cellular response to ethanol
7	ENSGALG00000029260	0.683763	2.79959	472	215	0.087	0.27	2.03364	1.16e-10	2.56e-06	up	H-RAS	HRas proto-oncogene, GTPase [Source:NCBI gene;Acc:396229]	Environmental Information Processing;Cellular Processes;Cellular Processes;Cellular Processes;Cellular Processes;Environmental Information Processing;Environmental Information Processing;Cellular Processes;Organismal Systems;Cellular Processes;Environmental Information Processing;Organismal Systems;Human Diseases;Organismal Systems;Cellular Processes;Environmental Information Processing;Environme…	Signal transduction;Transport and catabolism;Cell motility;Cellular community - eukaryotes;Cell growth and death;Signal transduction;Signal transduction;Cell growth and death;Endocrine system;Transport and catabolism;Signal transduction;Endocrine system;Endocrine and metabolic diseases;Endocrine system;Cellular community - eukaryotes;Signal transduction;Signal transduction;Transport and catabolism	ko04010//MAPK signaling pathway;ko04144//Endocytosis;ko04810//Regulation of actin cytoskeleton;ko04510//Focal adhesion;ko04218//Cellular senescence;ko04150//mTOR signaling pathway;ko04068//FoxO signaling pathway;ko04210//Apoptosis;ko04910//Insulin signaling pathway;ko04140//Autophagy - animal;ko04371//Apelin signaling pathway;ko04916//Melanogenesis;ko04933//AGE-RAGE signaling pathway in diabetic …	K02833;K02833;K02833;K02833;K02833;K02833;K02833;K02833;K02833;K02833;K02833;K02833;K02833;K02833;K02833;K02833;K02833;K02833	GO:0000139//Golgi membrane;GO:0005794//Golgi apparatus;GO:0005886//plasma membrane;GO:0016020//membrane;GO:0098978//glutamatergic synapse	GO:0000166//nucleotide binding;GO:0003924//GTPase activity;GO:0005525//GTP binding;GO:0008022//protein C-terminus binding;GO:0019003//GDP binding	GO:0001934//positive regulation of protein phosphorylation;GO:0006897//endocytosis;GO:0007050//cell cycle arrest;GO:0007093//mitotic cell cycle checkpoint;GO:0007165//signal transduction;GO:0007264//small GTPase mediated signal transduction;GO:0007265//Ras protein signal transduction;GO:0007569//cell aging;GO:0008283//cell proliferation;GO:0008284//positive regulation of cell proliferation;GO:000…
7	ENSGALG00000012072	1.0234	3.38116	472	215	0.144	0.312	1.72415	1.45e-10	3.22e-06	up	-	poly(ADP-ribose) polymerase family member 14 [Source:NCBI gene;Acc:101747378]	-	-	-	-	-	GO:0003950//NAD+ ADP-ribosyltransferase activity;GO:0016740//transferase activity;GO:0016757//transferase activity, transferring glycosyl groups	-
7	ENSGALG00000042227	10.3414	46.4877	472	215	0.091	0.265	2.16842	1.79e-10	3.97e-06	up	GNLY	granulysin [Source:NCBI gene;Acc:693257]	-	-	-	-	-	-	GO:0006629//lipid metabolic process;GO:0042742//defense response to bacterium
7	ENSGALG00000021529	1.04163	3.654	472	215	0.123	0.293	1.81063	1.8e-10	4e-06	up	-	glycoprotein Ib platelet beta subunit [Source:NCBI gene;Acc:107051576]	Environmental Information Processing	Signaling molecules and interaction	ko04512//ECM-receptor interaction	K06262	GO:0016020//membrane;GO:0016021//integral component of membrane	GO:0005515//protein binding	-
7	ENSGALG00000011432	1.30253	3.90288	472	215	0.138	0.344	1.58322	2.24e-10	4.97e-06	up	CDC42BPB	CDC42 binding protein kinase beta [Source:NCBI gene;Acc:423473]	-	-	-	-	GO:0042641//actomyosin	GO:0000166//nucleotide binding;GO:0004672//protein kinase activity;GO:0004674//protein serine/threonine kinase activity;GO:0005524//ATP binding;GO:0016301//kinase activity;GO:0016740//transferase activity;GO:0044877//protein-containing complex binding;GO:0046872//metal ion binding	GO:0006468//protein phosphorylation;GO:0016310//phosphorylation;GO:0016477//cell migration;GO:0030036//actin cytoskeleton organization;GO:0031032//actomyosin structure organization;GO:0035556//intracellular signal transduction
7	ENSGALG00000036932	2.68602	5.50486	472	215	0.307	0.391	1.03523	2.78e-10	6.17e-06	up	SPEN	spen family transcriptional repressor [Source:NCBI gene;Acc:419460]	-	-	-	-	GO:0005634//nucleus;GO:0005654//nucleoplasm;GO:0017053//transcriptional repressor complex	GO:0001085//RNA polymerase II transcription factor binding;GO:0003676//nucleic acid binding;GO:0003714//transcription corepressor activity;GO:0003723//RNA binding	GO:0000122//negative regulation of transcription by RNA polymerase II;GO:0045892//negative regulation of transcription, DNA-templated;GO:0050769//positive regulation of neurogenesis
7	ENSGALG00000013971	3.24857	7.76021	472	215	0.297	0.493	1.25629	3.11e-10	6.9e-06	up	SGK1	serum/glucocorticoid regulated kinase 1 [Source:NCBI gene;Acc:395133]	Environmental Information Processing;Environmental Information Processing	Signal transduction;Signal transduction	ko04150//mTOR signaling pathway;ko04068//FoxO signaling pathway	K13302;K13302	GO:0005634//nucleus;GO:0005737//cytoplasm;GO:0005783//endoplasmic reticulum;GO:0005829//cytosol;GO:0016607//nuclear speck	GO:0000166//nucleotide binding;GO:0004672//protein kinase activity;GO:0004674//protein serine/threonine kinase activity;GO:0004712//protein serine/threonine/tyrosine kinase activity;GO:0005524//ATP binding;GO:0015459//potassium channel regulator activity;GO:0016301//kinase activity;GO:0016740//transferase activity	GO:0006468//protein phosphorylation;GO:0006915//apoptotic process;GO:0006974//cellular response to DNA damage stimulus;GO:0016310//phosphorylation;GO:0018105//peptidyl-serine phosphorylation;GO:0035556//intracellular signal transduction;GO:0048812//neuron projection morphogenesis
7	ENSGALG00000003409	0.720541	2.92709	472	215	0.087	0.26	2.02231	3.68e-10	8.16e-06	up	SOGA1	suppressor of glucose, autophagy associated 1 [Source:NCBI gene;Acc:419159]	-	-	-	-	GO:0005615//extracellular space	-	GO:0008286//insulin receptor signaling pathway;GO:0010506//regulation of autophagy
7	ENSGALG00000037913	2.58051	6.32919	472	215	0.269	0.447	1.29437	3.77e-10	8.36e-06	up	KLF10	Kruppel-like factor 10 [Source:NCBI gene;Acc:420255]	-	-	-	-	GO:0005634//nucleus	GO:0000978//RNA polymerase II proximal promoter sequence-specific DNA binding;GO:0000981//DNA-binding transcription factor activity, RNA polymerase II-specific;GO:0001046//core promoter sequence-specific DNA binding;GO:0001228//DNA-binding transcription activator activity, RNA polymerase II-specific;GO:0003676//nucleic acid binding	GO:0006355//regulation of transcription, DNA-templated;GO:0006357//regulation of transcription by RNA polymerase II;GO:0007623//circadian rhythm;GO:0009267//cellular response to starvation;GO:0030282//bone mineralization;GO:0035019//somatic stem cell population maintenance;GO:0045672//positive regulation of osteoclast differentiation;GO:0045892//negative regulation of transcription, DNA-templated…
7	ENSGALG00000031582	1.99001	4.90897	472	215	0.248	0.414	1.30264	6.65e-10	1.47e-05	up	RAB1A	RAB1A, member RAS oncogene family [Source:NCBI gene;Acc:421273]	-	-	-	-	GO:0000139//Golgi membrane;GO:0005794//Golgi apparatus;GO:0016020//membrane;GO:0042470//melanosome	GO:0003924//GTPase activity;GO:0005525//GTP binding	GO:0000045//autophagosome assembly;GO:0006888//ER to Golgi vesicle-mediated transport;GO:0006897//endocytosis;GO:0006914//autophagy;GO:0007030//Golgi organization;GO:0016477//cell migration;GO:0019068//virion assembly;GO:0030252//growth hormone secretion;GO:0032402//melanosome transport;GO:0034446//substrate adhesion-dependent cell spreading;GO:0042742//defense response to bacterium;GO:0047496//v…
7	ENSGALG00000042351	1.43384	3.66554	472	215	0.186	0.326	1.35414	6.7e-10	1.49e-05	up	PIK3R6	phosphoinositide-3-kinase regulatory subunit 6 [Source:NCBI gene;Acc:769202]	Organismal Systems;Environmental Information Processing	Circulatory system;Signal transduction	ko04261//Adrenergic signaling in cardiomyocytes;ko04371//Apelin signaling pathway	K21290;K21290	GO:0005942//phosphatidylinositol 3-kinase complex;GO:0005944//phosphatidylinositol 3-kinase complex, class IB;GO:0016020//membrane	GO:0046934//phosphatidylinositol-4,5-bisphosphate 3-kinase activity;GO:0046935//1-phosphatidylinositol-3-kinase regulator activity	GO:0007186//G protein-coupled receptor signaling pathway;GO:0014065//phosphatidylinositol 3-kinase signaling;GO:0042269//regulation of natural killer cell mediated cytotoxicity;GO:0043406//positive regulation of MAP kinase activity;GO:0043551//regulation of phosphatidylinositol 3-kinase activity;GO:0045582//positive regulation of T cell differentiation;GO:0045766//positive regulation of angiogene…
7	ENSGALG00000014922	2.48991	5.72996	472	215	0.273	0.414	1.20243	8.65e-10	1.92e-05	up	ROCK1	Rho-associated, coiled-coil containing protein kinase 1 [Source:NCBI gene;Acc:373970]	Cellular Processes;Cellular Processes;Cellular Processes;Organismal Systems;Environmental Information Processing;Human Diseases	Cell motility;Cellular community - eukaryotes;Cellular community - eukaryotes;Circulatory system;Signal transduction;Infectious diseases	ko04810//Regulation of actin cytoskeleton;ko04510//Focal adhesion;ko04530//Tight junction;ko04270//Vascular smooth muscle contraction;ko04350//TGF-beta signaling pathway;ko05132//Salmonella infection	K04514;K04514;K04514;K04514;K04514;K04514	GO:0001726//ruffle;GO:0005856//cytoskeleton;GO:0005886//plasma membrane;GO:0010494//cytoplasmic stress granule;GO:0030027//lamellipodium;GO:0106003//amyloid-beta complex	GO:0000166//nucleotide binding;GO:0004672//protein kinase activity;GO:0004674//protein serine/threonine kinase activity;GO:0005524//ATP binding;GO:0016301//kinase activity;GO:0016740//transferase activity;GO:0017048//Rho GTPase binding;GO:0017049//GTP-Rho binding;GO:0046872//metal ion binding;GO:0072518//Rho-dependent protein serine/threonine kinase activity	GO:0003383//apical constriction;GO:0006468//protein phosphorylation;GO:0007159//leukocyte cell-cell adhesion;GO:0007249//I-kappaB kinase/NF-kappaB signaling;GO:0007266//Rho protein signal transduction;GO:0010508//positive regulation of autophagy;GO:0010613//positive regulation of cardiac muscle hypertrophy;GO:0010628//positive regulation of gene expression;GO:0016310//phosphorylation;GO:0016525//…
7	ENSGALG00000001907	2.38336	5.12594	472	215	0.288	0.409	1.10482	9.53e-10	2.11e-05	up	WAPL	WAPL cohesin release factor [Source:NCBI gene;Acc:423608]	-	-	-	-	GO:0000785//chromatin;GO:0000795//synaptonemal complex;GO:0005634//nucleus;GO:0005737//cytoplasm;GO:0008278//cohesin complex	-	GO:0000278//mitotic cell cycle;GO:0008156//negative regulation of DNA replication;GO:0009636//response to toxic substance;GO:0035562//negative regulation of chromatin binding;GO:0045132//meiotic chromosome segregation;GO:0045875//negative regulation of sister chromatid cohesion;GO:0048146//positive regulation of fibroblast proliferation;GO:0051983//regulation of chromosome segregation;GO:0060623/…
7	ENSGALG00000013397	0.703781	2.7305	472	215	0.095	0.27	1.95597	1.22e-09	2.7e-05	up	EXOC3	exocyst complex component 3 [Source:NCBI gene;Acc:420987]	-	-	-	-	GO:0000145//exocyst	GO:0000149//SNARE binding	GO:0006887//exocytosis;GO:0051601//exocyst localization
7	ENSGALG00000020249	2.08498	5.29957	472	215	0.206	0.395	1.34584	2.08e-09	4.62e-05	up	RAPGEF2	Rap guanine nucleotide exchange factor 2 [Source:NCBI gene;Acc:422418]	Environmental Information Processing;Cellular Processes	Signal transduction;Cellular community - eukaryotes	ko04010//MAPK signaling pathway;ko04530//Tight junction	K08018;K08018	GO:0005622//intracellular;GO:0005737//cytoplasm;GO:0005770//late endosome;GO:0005829//cytosol;GO:0005923//bicellular tight junction;GO:0016020//membrane;GO:0016324//apical plasma membrane;GO:0030139//endocytic vesicle;GO:0048471//perinuclear region of cytoplasm	GO:0005085//guanyl-nucleotide exchange factor activity;GO:0005088//Ras guanyl-nucleotide exchange factor activity;GO:0005096//GTPase activator activity;GO:0005515//protein binding;GO:0017034//Rap guanyl-nucleotide exchange factor activity;GO:0030165//PDZ domain binding;GO:0030552//cAMP binding;GO:0031697//beta-1 adrenergic receptor binding;GO:0050699//WW domain binding;GO:0070300//phosphatidic ac…	GO:0007165//signal transduction;GO:0007186//G protein-coupled receptor signaling pathway;GO:0007218//neuropeptide signaling pathway;GO:0007264//small GTPase mediated signal transduction;GO:0008285//negative regulation of cell proliferation;GO:0019933//cAMP-mediated signaling;GO:0030033//microvillus assembly;GO:0031175//neuron projection development;GO:0032486//Rap protein signal transduction;GO:0…
7	ENSGALG00000015170	1.15893	3.52377	472	215	0.138	0.312	1.60433	2.15e-09	4.78e-05	up	VPS13A	vacuolar protein sorting 13 homolog A [Source:NCBI gene;Acc:427050]	-	-	-	-	GO:0019898//extrinsic component of membrane;GO:0031045//dense core granule	-	GO:0006623//protein targeting to vacuole;GO:0006914//autophagy;GO:0007399//nervous system development;GO:0007626//locomotory behavior;GO:0035176//social behavior;GO:0045053//protein retention in Golgi apparatus
7	ENSGALG00000001328	1.84934	4.77828	472	215	0.212	0.377	1.36948	2.79e-09	6.18e-05	up	BSG	basigin (Ok blood group) [Source:NCBI gene;Acc:770363]	-	-	-	-	GO:0002080//acrosomal membrane;GO:0005886//plasma membrane;GO:0016020//membrane;GO:0016021//integral component of membrane;GO:0030424//axon;GO:0042470//melanosome;GO:0043231//intracellular membrane-bounded organelle	GO:0098632//cell-cell adhesion mediator activity	GO:0007156//homophilic cell adhesion via plasma membrane adhesion molecules;GO:0007411//axon guidance;GO:0070593//dendrite self-avoidance
7	ENSGALG00000026159	0.83603	3.176	472	215	0.093	0.27	1.92558	3.06e-09	6.79e-05	up	PDLIM7	PDZ and LIM domain 7 [Source:NCBI gene;Acc:416362]	-	-	-	-	GO:0001725//stress fiber;GO:0001726//ruffle;GO:0005634//nucleus;GO:0005737//cytoplasm;GO:0005884//actin filament;GO:0005913//cell-cell adherens junction;GO:0005925//focal adhesion;GO:0015629//actin cytoskeleton;GO:0030864//cortical actin cytoskeleton;GO:0031941//filamentous actin;GO:0048471//perinuclear region of cytoplasm	GO:0005515//protein binding;GO:0008134//transcription factor binding;GO:0033613//activating transcription factor binding;GO:0046872//metal ion binding	GO:0006913//nucleocytoplasmic transport;GO:0030036//actin cytoskeleton organization;GO:0032880//regulation of protein localization;GO:0043433//negative regulation of DNA-binding transcription factor activity
7	ENSGALG00000015864	1.15053	3.46889	472	215	0.146	0.279	1.59218	4.04e-09	8.96e-05	up	IBTK	inhibitor of Bruton tyrosine kinase [Source:NCBI gene;Acc:421844]	-	-	-	-	GO:0005654//nucleoplasm;GO:0005737//cytoplasm	GO:0005515//protein binding;GO:0019901//protein kinase binding;GO:0030292//protein tyrosine kinase inhibitor activity	GO:0001933//negative regulation of protein phosphorylation;GO:0051209//release of sequestered calcium ion into cytosol
7	ENSGALG00000011094	2.00657	4.61607	472	215	0.252	0.386	1.20193	4.1e-09	9.08e-05	up	PDE4B	phosphodiesterase 4B [Source:NCBI gene;Acc:424700]	Metabolism	Nucleotide metabolism	ko00230//Purine metabolism	K13293	GO:0005829//cytosol	GO:0004114//3',5'-cyclic-nucleotide phosphodiesterase activity;GO:0004115//3',5'-cyclic-AMP phosphodiesterase activity;GO:0005515//protein binding;GO:0008081//phosphoric diester hydrolase activity;GO:0016787//hydrolase activity;GO:0030552//cAMP binding;GO:0044325//ion channel binding;GO:0046872//metal ion binding	GO:0007165//signal transduction
7	ENSGALG00000054766	1.51931	4.36389	472	215	0.153	0.335	1.5222	8.42e-09	0.000186579	up	ITGA2B	integrin subunit alpha 2b [Source:NCBI gene;Acc:101749783]	Cellular Processes;Cellular Processes;Environmental Information Processing	Cell motility;Cellular community - eukaryotes;Signaling molecules and interaction	ko04810//Regulation of actin cytoskeleton;ko04510//Focal adhesion;ko04512//ECM-receptor interaction	K06476;K06476;K06476	GO:0005925//focal adhesion;GO:0008305//integrin complex;GO:0009897//external side of plasma membrane;GO:0009986//cell surface;GO:0070062//extracellular exosome	GO:0042802//identical protein binding;GO:0050840//extracellular matrix binding	GO:0007155//cell adhesion;GO:0007160//cell-matrix adhesion
7	ENSGALG00000041454	1.18017	3.4416	472	215	0.163	0.274	1.54408	1.46e-08	0.000322689	up	Dnmt3a	DNA methyltransferase 3 alpha [Source:NCBI gene;Acc:421991]	Metabolism;Metabolism	Global and overview maps;Amino acid metabolism	ko01100//Metabolic pathways;ko00270//Cysteine and methionine metabolism	K17398;K17398	GO:0000775//chromosome, centromeric region;GO:0000791//euchromatin;GO:0000792//heterochromatin;GO:0005634//nucleus;GO:0005654//nucleoplasm;GO:0005720//nuclear heterochromatin;GO:0005737//cytoplasm;GO:0016363//nuclear matrix	GO:0000978//RNA polymerase II proximal promoter sequence-specific DNA binding;GO:0003677//DNA binding;GO:0003682//chromatin binding;GO:0003886//DNA (cytosine-5-)-methyltransferase activity;GO:0008134//transcription factor binding;GO:0008168//methyltransferase activity;GO:0009008//DNA-methyltransferase activity;GO:0016740//transferase activity;GO:0042802//identical protein binding	GO:0000122//negative regulation of transcription by RNA polymerase II;GO:0006306//DNA methylation;GO:0006346//methylation-dependent chromatin silencing;GO:0006349//regulation of gene expression by genetic imprinting;GO:0007283//spermatogenesis;GO:0010468//regulation of gene expression;GO:0032259//methylation;GO:0043045//DNA methylation involved in embryo development;GO:0043046//DNA methylation in…
7	ENSGALG00000032366	0.906593	2.79041	472	215	0.123	0.27	1.62195	1.72e-08	0.000380806	up	MEF2A	myocyte enhancer factor 2A [Source:NCBI gene;Acc:395670]	Environmental Information Processing	Signal transduction	ko04371//Apelin signaling pathway	K09260	GO:0000790//nuclear chromatin;GO:0005634//nucleus;GO:0005654//nucleoplasm;GO:0005667//transcription factor complex;GO:0005829//cytosol	GO:0000977//RNA polymerase II regulatory region sequence-specific DNA binding;GO:0000978//RNA polymerase II proximal promoter sequence-specific DNA binding;GO:0000981//DNA-binding transcription factor activity, RNA polymerase II-specific;GO:0001085//RNA polymerase II transcription factor binding;GO:0001228//DNA-binding transcription activator activity, RNA polymerase II-specific;GO:0003677//DNA b…	GO:0000002//mitochondrial genome maintenance;GO:0000122//negative regulation of transcription by RNA polymerase II;GO:0000165//MAPK cascade;GO:0006351//transcription, DNA-templated;GO:0006355//regulation of transcription, DNA-templated;GO:0007507//heart development;GO:0010613//positive regulation of cardiac muscle hypertrophy;GO:0045893//positive regulation of transcription, DNA-templated;GO:0045…
7	ENSGALG00000005902	1.58064	3.68871	472	215	0.208	0.321	1.22261	1.96e-08	0.000434048	up	RAB7A	RAB7A, member RAS oncogene family [Source:NCBI gene;Acc:416016]	Cellular Processes;Cellular Processes;Cellular Processes;Human Diseases;Cellular Processes	Transport and catabolism;Transport and catabolism;Transport and catabolism;Infectious diseases;Transport and catabolism	ko04144//Endocytosis;ko04145//Phagosome;ko04140//Autophagy - animal;ko05132//Salmonella infection;ko04137//Mitophagy - animal	K07897;K07897;K07897;K07897;K07897	GO:0005737//cytoplasm;GO:0005764//lysosome;GO:0005768//endosome;GO:0005770//late endosome;GO:0005794//Golgi apparatus;GO:0005811//lipid droplet;GO:0005829//cytosol;GO:0010008//endosome membrane;GO:0030904//retromer complex;GO:0031902//late endosome membrane;GO:0032419//extrinsic component of lysosome membrane;GO:0034045//phagophore assembly site membrane;GO:0045335//phagocytic vesicle	GO:0003924//GTPase activity;GO:0005525//GTP binding;GO:0019003//GDP binding;GO:1905394//retromer complex binding	GO:0000045//autophagosome assembly;GO:0006622//protein targeting to lysosome;GO:0007174//epidermal growth factor catabolic process;GO:0008333//endosome to lysosome transport;GO:0019076//viral release from host cell;GO:0022615//protein to membrane docking;GO:0042147//retrograde transport, endosome to Golgi;GO:0045022//early endosome to late endosome transport;GO:0045732//positive regulation of pro…
7	ENSGALG00000034003	1.22613	3.39189	472	215	0.146	0.312	1.46798	2.29e-08	0.000507755	up	ARID4B	AT-rich interaction domain 4B [Source:NCBI gene;Acc:425840]	-	-	-	-	GO:0005634//nucleus	GO:0003677//DNA binding	GO:0006349//regulation of gene expression by genetic imprinting;GO:0006355//regulation of transcription, DNA-templated;GO:0007283//spermatogenesis;GO:0034773//histone H4-K20 trimethylation;GO:0036124//histone H3-K9 trimethylation;GO:0045944//positive regulation of transcription by RNA polymerase II;GO:0097368//establishment of Sertoli cell barrier
7	ENSGALG00000021143	1.70548	4.48909	472	215	0.176	0.349	1.39625	3.22e-08	0.000713981	up	RGS18	regulator of G-protein signaling 18 [Source:NCBI gene;Acc:424361]	-	-	-	-	GO:0005737//cytoplasm	GO:0005096//GTPase activator activity	GO:0007186//G protein-coupled receptor signaling pathway;GO:0008277//regulation of G protein-coupled receptor signaling pathway;GO:0043547//positive regulation of GTPase activity
7	ENSGALG00000033694	3.1919	6.42312	472	215	0.324	0.479	1.00886	3.76e-08	0.000833715	up	IFI30	IFI30, lysosomal thiol reductase [Source:NCBI gene;Acc:420129]	-	-	-	-	-	-	-
7	ENSGALG00000011164	1.09447	3.22121	472	215	0.129	0.288	1.55737	3.85e-08	0.000853557	up	-	chimerin 2 [Source:NCBI gene;Acc:428437]	-	-	-	-	-	GO:0005096//GTPase activator activity;GO:0046872//metal ion binding	GO:0007165//signal transduction;GO:0035556//intracellular signal transduction;GO:0043547//positive regulation of GTPase activity;GO:0051056//regulation of small GTPase mediated signal transduction
7	ENSGALG00000001564	0.861977	2.64581	472	215	0.119	0.265	1.61799	4.76e-08	0.00105608	up	ATP2A3	ATPase sarcoplasmic/endoplasmic reticulum Ca2+ transporting 3 [Source:NCBI gene;Acc:395707]	Environmental Information Processing	Signal transduction	ko04020//Calcium signaling pathway	K05853	GO:0005783//endoplasmic reticulum;GO:0016020//membrane;GO:0016021//integral component of membrane;GO:0016529//sarcoplasmic reticulum;GO:0033017//sarcoplasmic reticulum membrane	GO:0000166//nucleotide binding;GO:0005388//calcium-transporting ATPase activity;GO:0005524//ATP binding;GO:0008553//proton-exporting ATPase activity, phosphorylative mechanism;GO:0016787//hydrolase activity	GO:0006811//ion transport;GO:0006816//calcium ion transport;GO:0006874//cellular calcium ion homeostasis;GO:0070588//calcium ion transmembrane transport;GO:0099132//ATP hydrolysis coupled cation transmembrane transport;GO:1902600//proton transmembrane transport
7	ENSGALG00000043372	1.78814	4.69296	472	215	0.121	0.298	1.39203	4.85e-08	0.00107546	up	RUNX3	runt related transcription factor 3 [Source:NCBI gene;Acc:769687]	-	-	-	-	GO:0005634//nucleus;GO:0005730//nucleolus;GO:0005737//cytoplasm;GO:0005829//cytosol;GO:0043231//intracellular membrane-bounded organelle	GO:0000981//DNA-binding transcription factor activity, RNA polymerase II-specific;GO:0003677//DNA binding;GO:0003700//DNA-binding transcription factor activity;GO:0005524//ATP binding	GO:0002062//chondrocyte differentiation;GO:0006355//regulation of transcription, DNA-templated;GO:0006357//regulation of transcription by RNA polymerase II;GO:0006468//protein phosphorylation;GO:0030097//hemopoiesis;GO:0030182//neuron differentiation;GO:0045893//positive regulation of transcription, DNA-templated;GO:0071559//response to transforming growth factor beta
7	ENSGALG00000015895	0.981519	2.85139	472	215	0.108	0.274	1.53858	6.24e-08	0.00138314	up	HTR1B	5-hydroxytryptamine receptor 1B [Source:NCBI gene;Acc:421858]	Environmental Information Processing	Signaling molecules and interaction	ko04080//Neuroactive ligand-receptor interaction	K04153	GO:0005737//cytoplasm;GO:0005886//plasma membrane;GO:0005887//integral component of plasma membrane;GO:0016020//membrane;GO:0016021//integral component of membrane;GO:0030425//dendrite;GO:0099056//integral component of presynaptic membrane;GO:0099154//serotonergic synapse	GO:0004930//G protein-coupled receptor activity;GO:0004993//G protein-coupled serotonin receptor activity;GO:0008144//drug binding;GO:0030594//neurotransmitter receptor activity;GO:0051378//serotonin binding	GO:0002031//G protein-coupled receptor internalization;GO:0007165//signal transduction;GO:0007186//G protein-coupled receptor signaling pathway;GO:0007187//G protein-coupled receptor signaling pathway, coupled to cyclic nucleotide second messenger;GO:0007193//adenylate cyclase-inhibiting G protein-coupled receptor signaling pathway;GO:0007198//adenylate cyclase-inhibiting serotonin receptor signa…
7	ENSGALG00000016481	1.16124	3.00825	472	215	0.15	0.284	1.37325	9.79e-08	0.00217095	up	PUM2	pumilio RNA binding family member 2 [Source:NCBI gene;Acc:421961]	-	-	-	-	GO:0005829//cytosol;GO:0010494//cytoplasmic stress granule;GO:0031965//nuclear membrane;GO:0048471//perinuclear region of cytoplasm	GO:0003723//RNA binding;GO:0003730//mRNA 3'-UTR binding;GO:0035198//miRNA binding	GO:0010608//posttranscriptional regulation of gene expression;GO:0034063//stress granule assembly;GO:0035196//production of miRNAs involved in gene silencing by miRNA;GO:0043488//regulation of mRNA stability;GO:0051983//regulation of chromosome segregation;GO:1900246//positive regulation of RIG-I signaling pathway;GO:2000637//positive regulation of gene silencing by miRNA
7	ENSGALG00000011708	1.58821	4.26105	472	215	0.14	0.312	1.42381	1.32e-07	0.00292693	up	MYLK	myosin light chain kinase [Source:NCBI gene;Acc:396445]	Cellular Processes;Cellular Processes;Environmental Information Processing;Environmental Information Processing;Organismal Systems	Cell motility;Cellular community - eukaryotes;Signal transduction;Signal transduction;Circulatory system	ko04810//Regulation of actin cytoskeleton;ko04510//Focal adhesion;ko04020//Calcium signaling pathway;ko04371//Apelin signaling pathway;ko04270//Vascular smooth muscle contraction	K00907;K00907;K00907;K00907;K00907	GO:0001725//stress fiber;GO:0005737//cytoplasm;GO:0005886//plasma membrane;GO:0015629//actin cytoskeleton;GO:0030027//lamellipodium;GO:0032154//cleavage furrow	GO:0004672//protein kinase activity;GO:0004687//myosin light chain kinase activity;GO:0005515//protein binding;GO:0005524//ATP binding;GO:0016301//kinase activity	GO:0006468//protein phosphorylation;GO:0006939//smooth muscle contraction;GO:0014820//tonic smooth muscle contraction;GO:0016310//phosphorylation;GO:0030335//positive regulation of cell migration;GO:0032060//bleb assembly;GO:0051928//positive regulation of calcium ion transport;GO:0060414//aorta smooth muscle tissue morphogenesis;GO:0071476//cellular hypotonic response;GO:0072358//cardiovascular …
7	ENSGALG00000039327	2.65783	5.43095	472	215	0.271	0.428	1.03095	1.97e-07	0.00435961	up	VAV3	vav 3 guanine nucleotide exchange factor [Source:NCBI gene;Acc:373939]	Cellular Processes;Cellular Processes	Cell motility;Cellular community - eukaryotes	ko04810//Regulation of actin cytoskeleton;ko04510//Focal adhesion	K05730;K05730	GO:0005737//cytoplasm;GO:0005886//plasma membrane	GO:0005085//guanyl-nucleotide exchange factor activity;GO:0005089//Rho guanyl-nucleotide exchange factor activity;GO:0005154//epidermal growth factor receptor binding;GO:0005515//protein binding;GO:0030676//Rac guanyl-nucleotide exchange factor activity;GO:0046872//metal ion binding	GO:0006906//vesicle fusion;GO:0006974//cellular response to DNA damage stimulus;GO:0007229//integrin-mediated signaling pathway;GO:0007264//small GTPase mediated signal transduction;GO:0008361//regulation of cell size;GO:0016477//cell migration;GO:0030031//cell projection assembly;GO:0030032//lamellipodium assembly;GO:0030593//neutrophil chemotaxis;GO:0030890//positive regulation of B cell prolif…
7	ENSGALG00000005061	0.954058	3.05936	472	215	0.1	0.251	1.68108	2.36e-07	0.00523621	up	PPM1E	protein phosphatase, Mg2+/Mn2+ dependent 1E [Source:NCBI gene;Acc:417627]	-	-	-	-	GO:0005634//nucleus;GO:0005730//nucleolus;GO:0032991//protein-containing complex	GO:0003824//catalytic activity;GO:0004721//phosphoprotein phosphatase activity;GO:0004722//protein serine/threonine phosphatase activity;GO:0004724//magnesium-dependent protein serine/threonine phosphatase activity;GO:0016787//hydrolase activity;GO:0043169//cation binding;GO:0046872//metal ion binding	GO:0006469//negative regulation of protein kinase activity;GO:0006470//protein dephosphorylation;GO:0035690//cellular response to drug;GO:0035970//peptidyl-threonine dephosphorylation;GO:0051496//positive regulation of stress fiber assembly
7	ENSGALG00000003392	1.67417	3.5853	472	215	0.214	0.326	1.09865	2.65e-07	0.00587752	up	SBNO1	strawberry notch homolog 1 [Source:NCBI gene;Acc:427694]	-	-	-	-	GO:0005575//cellular_component;GO:0005634//nucleus	GO:0003674//molecular_function	GO:0006355//regulation of transcription, DNA-templated;GO:0008150//biological_process
7	ENSGALG00000030859	0.934813	2.66127	472	215	0.121	0.256	1.50937	2.86e-07	0.00633134	up	GNAS	GNAS complex locus [Source:NCBI gene;Acc:419313]	Environmental Information Processing;Organismal Systems;Organismal Systems;Organismal Systems;Organismal Systems;Cellular Processes	Signal transduction;Circulatory system;Circulatory system;Endocrine system;Endocrine system;Cellular community - eukaryotes	ko04020//Calcium signaling pathway;ko04261//Adrenergic signaling in cardiomyocytes;ko04270//Vascular smooth muscle contraction;ko04916//Melanogenesis;ko04912//GnRH signaling pathway;ko04540//Gap junction	K04632;K04632;K04632;K04632;K04632;K04632	GO:0005829//cytosol;GO:0005834//heterotrimeric G-protein complex;GO:0016020//membrane;GO:0030425//dendrite	GO:0000166//nucleotide binding;GO:0001664//G protein-coupled receptor binding;GO:0003924//GTPase activity;GO:0005159//insulin-like growth factor receptor binding;GO:0005525//GTP binding;GO:0019001//guanyl nucleotide binding;GO:0031683//G-protein beta/gamma-subunit complex binding;GO:0031698//beta-2 adrenergic receptor binding;GO:0031748//D1 dopamine receptor binding;GO:0031852//mu-type opioid rec…	GO:0001501//skeletal system development;GO:0001894//tissue homeostasis;GO:0001958//endochondral ossification;GO:0006112//energy reserve metabolic process;GO:0006306//DNA methylation;GO:0007165//signal transduction;GO:0007186//G protein-coupled receptor signaling pathway;GO:0007188//adenylate cyclase-modulating G protein-coupled receptor signaling pathway;GO:0007189//adenylate cyclase-activating G…
7	ENSGALG00000010651	1.59309	4.18763	472	215	0.157	0.316	1.39431	2.91e-07	0.00644329	up	TFB2M	transcription factor B2, mitochondrial [Source:NCBI gene;Acc:421488]	-	-	-	-	GO:0005739//mitochondrion;GO:0005759//mitochondrial matrix;GO:0042645//mitochondrial nucleoid	GO:0000179//rRNA (adenine-N6,N6-)-dimethyltransferase activity;GO:0003712//transcription coregulator activity;GO:0003723//RNA binding;GO:0008168//methyltransferase activity;GO:0008649//rRNA methyltransferase activity;GO:0016740//transferase activity	GO:0000154//rRNA modification;GO:0006355//regulation of transcription, DNA-templated;GO:0006364//rRNA processing;GO:0006390//mitochondrial transcription;GO:0006391//transcription initiation from mitochondrial promoter;GO:0031167//rRNA methylation;GO:0032259//methylation;GO:0045893//positive regulation of transcription, DNA-templated
7	ENSGALG00000029970	1.44389	3.53403	472	215	0.161	0.33	1.29135	3.8e-07	0.00842027	up	LIMS1	LIM zinc finger domain containing 1 [Source:NCBI gene;Acc:414880]	-	-	-	-	-	GO:0046872//metal ion binding	-
7	ENSGALG00000016267	1.23897	2.95291	472	215	0.163	0.284	1.253	5.04e-07	0.0111688	up	PHF3	PHD finger protein 3 [Source:NCBI gene;Acc:428641]	-	-	-	-	-	GO:0046872//metal ion binding	GO:0006351//transcription, DNA-templated
7	ENSGALG00000000720	1.12995	3.27409	472	215	0.146	0.26	1.53483	5.13e-07	0.0113618	up	-	guanylate binding protein 1 [Source:NCBI gene;Acc:419563]	Organismal Systems	Immune system	ko04621//NOD-like receptor signaling pathway	K20899	-	GO:0000166//nucleotide binding;GO:0003924//GTPase activity;GO:0005525//GTP binding	-
7	ENSGALG00000004496	1.24795	2.90446	472	215	0.167	0.265	1.21871	6.42e-07	0.0142197	up	TNIP1	TNFAIP3 interacting protein 1 [Source:NCBI gene;Acc:100858009]	-	-	-	-	GO:0005654//nucleoplasm;GO:0005829//cytosol	GO:0042802//identical protein binding;GO:0051019//mitogen-activated protein kinase binding	GO:0002755//MyD88-dependent toll-like receptor signaling pathway;GO:0007159//leukocyte cell-cell adhesion;GO:0009101//glycoprotein biosynthetic process;GO:0043124//negative regulation of I-kappaB kinase/NF-kappaB signaling;GO:0050727//regulation of inflammatory response;GO:0070373//negative regulation of ERK1 and ERK2 cascade;GO:0085032//modulation by symbiont of host I-kappaB kinase/NF-kappaB ca…
7	ENSGALG00000039182	1.79507	3.78334	472	215	0.229	0.34	1.07562	7.52e-07	0.0166792	up	TBL1XR1	transducin beta like 1 X-linked receptor 1 [Source:NCBI gene;Acc:426284]	Environmental Information Processing	Signal transduction	ko04310//Wnt signaling pathway	K04508	GO:0000118//histone deacetylase complex;GO:0005634//nucleus;GO:0017053//transcriptional repressor complex;GO:0072686//mitotic spindle	GO:0003677//DNA binding;GO:0003714//transcription corepressor activity;GO:0005515//protein binding;GO:0008013//beta-catenin binding;GO:0042393//histone binding;GO:0044212//transcription regulatory region DNA binding;GO:0047485//protein N-terminus binding	GO:0000122//negative regulation of transcription by RNA polymerase II;GO:0001835//blastocyst hatching;GO:0002021//response to dietary excess;GO:0006357//regulation of transcription by RNA polymerase II;GO:0010468//regulation of gene expression;GO:0016042//lipid catabolic process;GO:0016575//histone deacetylation;GO:0035264//multicellular organism growth;GO:0043161//proteasome-mediated ubiquitin-d…
7	ENSGALG00000039575	1.70617	4.00636	472	215	0.201	0.349	1.23153	8.1e-07	0.0179451	up	AMD1	adenosylmethionine decarboxylase 1 [Source:NCBI gene;Acc:421755]	Metabolism;Metabolism;Metabolism	Global and overview maps;Amino acid metabolism;Amino acid metabolism	ko01100//Metabolic pathways;ko00330//Arginine and proline metabolism;ko00270//Cysteine and methionine metabolism	K01611;K01611;K01611	GO:0005829//cytosol	GO:0004014//adenosylmethionine decarboxylase activity;GO:0016829//lyase activity;GO:0016831//carboxy-lyase activity	GO:0006557//S-adenosylmethioninamine biosynthetic process;GO:0006596//polyamine biosynthetic process;GO:0006597//spermine biosynthetic process;GO:0008295//spermidine biosynthetic process
7	ENSGALG00000006054	1.96592	3.93317	472	215	0.227	0.316	1.00049	1.77e-06	0.0392052	up	CALCB	calcitonin related polypeptide beta [Source:NCBI gene;Acc:396256]	-	-	-	-	GO:0005576//extracellular region	GO:0005179//hormone activity	GO:0010469//regulation of signaling receptor activity
7	ENSGALG00000011405	1.9193	4.01599	472	215	0.233	0.34	1.06517	2.88e-06	0.0637408	up	SLC4A7	solute carrier family 4 member 7 [Source:NCBI gene;Acc:420658]	-	-	-	-	GO:0005887//integral component of plasma membrane;GO:0016020//membrane;GO:0016021//integral component of membrane	GO:0005452//inorganic anion exchanger activity;GO:0008509//anion transmembrane transporter activity;GO:0008510//sodium:bicarbonate symporter activity	GO:0006811//ion transport;GO:0006820//anion transport;GO:0015698//inorganic anion transport;GO:0015701//bicarbonate transport;GO:0051453//regulation of intracellular pH;GO:0098656//anion transmembrane transport
7	ENSGALG00000012791	1.19838	2.76837	472	215	0.15	0.27	1.20795	4.98e-06	0.110406	up	TBXAS1	thromboxane A synthase 1 [Source:NCBI gene;Acc:418101]	Metabolism;Metabolism	Global and overview maps;Lipid metabolism	ko01100//Metabolic pathways;ko00590//Arachidonic acid metabolism	K01832;K01832	GO:0016020//membrane;GO:0016021//integral component of membrane	GO:0004497//monooxygenase activity;GO:0004796//thromboxane-A synthase activity;GO:0005506//iron ion binding;GO:0016491//oxidoreductase activity;GO:0016705//oxidoreductase activity, acting on paired donors, with incorporation or reduction of molecular oxygen;GO:0020037//heme binding;GO:0046872//metal ion binding	GO:0055114//oxidation-reduction process
7	ENSGALG00000006439	2.00775	4.04439	472	215	0.246	0.344	1.01034	6.94e-06	0.153741	up	ARHGEF6	Rac/Cdc42 guanine nucleotide exchange factor 6 [Source:NCBI gene;Acc:422247]	Cellular Processes	Cell motility	ko04810//Regulation of actin cytoskeleton	K05729	GO:0030027//lamellipodium;GO:0042995//cell projection	GO:0005085//guanyl-nucleotide exchange factor activity;GO:0005089//Rho guanyl-nucleotide exchange factor activity;GO:0005515//protein binding	GO:0035023//regulation of Rho protein signal transduction;GO:0035556//intracellular signal transduction
7	ENSGALG00000004958	1.42871	3.38445	472	215	0.167	0.298	1.24421	7.64e-06	0.1694	up	BTK	Bruton tyrosine kinase [Source:NCBI gene;Acc:374075]	-	-	-	-	GO:0005634//nucleus;GO:0005737//cytoplasm;GO:0005829//cytosol;GO:0005886//plasma membrane;GO:0031410//cytoplasmic vesicle;GO:0045121//membrane raft	GO:0000166//nucleotide binding;GO:0004672//protein kinase activity;GO:0004713//protein tyrosine kinase activity;GO:0004715//non-membrane spanning protein tyrosine kinase activity;GO:0005515//protein binding;GO:0005524//ATP binding;GO:0005547//phosphatidylinositol-3,4,5-trisphosphate binding;GO:0016301//kinase activity;GO:0016740//transferase activity;GO:0042802//identical protein binding	GO:0001818//negative regulation of cytokine production;GO:0002344//B cell affinity maturation;GO:0006468//protein phosphorylation;GO:0007249//I-kappaB kinase/NF-kappaB signaling;GO:0016310//phosphorylation;GO:0018108//peptidyl-tyrosine phosphorylation;GO:0030889//negative regulation of B cell proliferation;GO:0035556//intracellular signal transduction;GO:0048469//cell maturation;GO:0098761//cellu…
7	ENSGALG00000031604	1.49474	3.45336	472	215	0.167	0.312	1.20811	7.94e-06	0.175904	up	-	tet methylcytosine dioxygenase 1 [Source:NCBI gene;Acc:423690]	-	-	-	-	GO:0005634//nucleus	GO:0003677//DNA binding;GO:0005506//iron ion binding;GO:0008270//zinc ion binding;GO:0070579//methylcytosine dioxygenase activity	GO:0006211//5-methylcytosine catabolic process;GO:0045944//positive regulation of transcription by RNA polymerase II;GO:0055114//oxidation-reduction process;GO:0070989//oxidative demethylation;GO:0080111//DNA demethylation
7	ENSGALG00000036556	1.17775	2.77093	472	215	0.15	0.256	1.23434	8.7e-06	0.192913	up	MORC3	MORC family CW-type zinc finger 3 [Source:NCBI gene;Acc:418513]	-	-	-	-	GO:0005634//nucleus;GO:0005654//nucleoplasm;GO:0016605//PML body	GO:0008270//zinc ion binding	GO:0006468//protein phosphorylation;GO:0007569//cell aging;GO:0009791//post-embryonic development;GO:0018105//peptidyl-serine phosphorylation;GO:0048147//negative regulation of fibroblast proliferation;GO:0050821//protein stabilization;GO:0051457//maintenance of protein location in nucleus
7	ENSGALG00000010174	1.67049	3.45922	472	215	0.197	0.316	1.05018	9.39e-06	0.208028	up	SLC35B2	solute carrier family 35 member B2 [Source:NCBI gene;Acc:428575]	-	-	-	-	GO:0005794//Golgi apparatus;GO:0016020//membrane;GO:0016021//integral component of membrane;GO:0030173//integral component of Golgi membrane;GO:0030176//integral component of endoplasmic reticulum membrane	GO:0022857//transmembrane transporter activity;GO:0046964//3'-phosphoadenosine 5'-phosphosulfate transmembrane transporter activity	GO:0046963//3'-phosphoadenosine 5'-phosphosulfate transport;GO:0055085//transmembrane transport;GO:1902559//3'-phospho-5'-adenylyl sulfate transmembrane transport
7	ENSGALG00000008403	1.42292	3.12312	472	215	0.176	0.284	1.13413	1.97e-05	0.436962	up	PHF21A	PHD finger protein 21A [Source:NCBI gene;Acc:423199]	-	-	-	-	GO:0000118//histone deacetylase complex;GO:1990391//DNA repair complex	GO:0046872//metal ion binding	GO:0000122//negative regulation of transcription by RNA polymerase II
7	ENSGALG00000047664	1.26036	2.83761	472	215	0.163	0.26	1.17084	2.08e-05	0.460842	up	-	-	-	-	-	-	GO:0005856//cytoskeleton	GO:0003779//actin binding;GO:0005198//structural molecule activity;GO:0008092//cytoskeletal protein binding	GO:0030866//cortical actin cytoskeleton organization
7	ENSGALG00000003052	1.27487	2.6593	472	215	0.169	0.265	1.0607	3.22e-05	0.713862	up	AGFG1	ArfGAP with FG repeats 1 [Source:NCBI gene;Acc:424793]	Human Diseases	Infectious diseases	ko05164//Influenza A	K15044	GO:0031410//cytoplasmic vesicle;GO:0042995//cell projection;GO:0043025//neuronal cell body;GO:0043231//intracellular membrane-bounded organelle	GO:0005096//GTPase activator activity;GO:0046872//metal ion binding	GO:0001675//acrosome assembly;GO:0007289//spermatid nucleus differentiation;GO:0043547//positive regulation of GTPase activity;GO:0045109//intermediate filament organization
7	ENSGALG00000044716	1.57885	3.28748	472	215	0.184	0.288	1.05811	5.47e-05	1	up	KIAA1109	KIAA1109 [Source:NCBI gene;Acc:422670]	-	-	-	-	GO:0016020//membrane;GO:0016021//integral component of membrane;GO:0098793//presynapse	-	GO:0048488//synaptic vesicle endocytosis
7	ENSGALG00000031282	1.2591	2.63698	472	215	0.163	0.256	1.06649	5.68e-05	1	up	UBR5	ubiquitin protein ligase E3 component n-recognin 5 [Source:NCBI gene;Acc:420252]	Genetic Information Processing	Folding, sorting and degradation	ko04120//Ubiquitin mediated proteolysis	K10593	GO:0005634//nucleus;GO:0005654//nucleoplasm;GO:0005829//cytosol;GO:0032991//protein-containing complex;GO:0048471//perinuclear region of cytoplasm	GO:0003723//RNA binding;GO:0004842//ubiquitin-protein transferase activity;GO:0008270//zinc ion binding;GO:0016740//transferase activity;GO:0034450//ubiquitin-ubiquitin ligase activity;GO:0043130//ubiquitin binding;GO:0061630//ubiquitin protein ligase activity	GO:0000209//protein polyubiquitination;GO:0006974//cellular response to DNA damage stimulus;GO:0010628//positive regulation of gene expression;GO:0042307//positive regulation of protein import into nucleus;GO:0050847//progesterone receptor signaling pathway;GO:0070936//protein K48-linked ubiquitination;GO:0090263//positive regulation of canonical Wnt signaling pathway;GO:1901315//negative regulat…
7	ENSGALG00000007331	1.72197	3.62282	472	215	0.18	0.288	1.07306	0.000142157	1	up	SVIL	supervillin [Source:NCBI gene;Acc:420475]	-	-	-	-	GO:0005634//nucleus;GO:0005737//cytoplasm;GO:0005829//cytosol;GO:0005886//plasma membrane;GO:0015629//actin cytoskeleton;GO:0043034//costamere	GO:0003779//actin binding;GO:0051015//actin filament binding	GO:0007010//cytoskeleton organization;GO:0007519//skeletal muscle tissue development
7	ENSGALG00000030008	1.52724	3.14629	472	215	0.159	0.27	1.04272	0.000616497	1	up	HHEX	hematopoietically expressed homeobox [Source:NCBI gene;Acc:396182]	-	-	-	-	GO:0005634//nucleus;GO:0005737//cytoplasm	GO:0000977//RNA polymerase II regulatory region sequence-specific DNA binding;GO:0001227//DNA-binding transcription repressor activity, RNA polymerase II-specific;GO:0003677//DNA binding;GO:0003682//chromatin binding;GO:0003700//DNA-binding transcription factor activity;GO:0043565//sequence-specific DNA binding;GO:0071837//HMG box domain binding	GO:0000122//negative regulation of transcription by RNA polymerase II;GO:0001570//vasculogenesis;GO:0001701//in utero embryonic development;GO:0001889//liver development;GO:0002009//morphogenesis of an epithelium;GO:0002573//myeloid leukocyte differentiation;GO:0006355//regulation of transcription, DNA-templated;GO:0006357//regulation of transcription by RNA polymerase II;GO:0007165//signal trans…
7	ENSGALG00000028872	62.846	29.7893	472	215	0.985	0.865	-1.07703	2.74e-52	6.07e-48	down	TPT1	tumor protein, translationally-controlled 1 [Source:NCBI gene;Acc:396363]	-	-	-	-	GO:0000922//spindle pole;GO:0005615//extracellular space;GO:0005654//nucleoplasm;GO:0005737//cytoplasm;GO:0005771//multivesicular body;GO:0005829//cytosol;GO:0005881//cytoplasmic microtubule	GO:0005509//calcium ion binding;GO:0008134//transcription factor binding	GO:0019827//stem cell population maintenance;GO:2000384//negative regulation of ectoderm development
7	ENSGALG00000005338	35.9788	15.4051	472	215	0.96	0.721	-1.22374	9.03e-44	2e-39	down	RPS21	ribosomal protein S21 [Source:NCBI gene;Acc:419228]	Genetic Information Processing	Translation	ko03010//Ribosome	K02971	GO:0005622//intracellular;GO:0005840//ribosome;GO:0022627//cytosolic small ribosomal subunit;GO:0042788//polysomal ribosome;GO:0045202//synapse	GO:0003735//structural constituent of ribosome;GO:0047485//protein N-terminus binding	GO:0000447//endonucleolytic cleavage in ITS1 to separate SSU-rRNA from 5.8S rRNA and LSU-rRNA from tricistronic rRNA transcript (SSU-rRNA, 5.8S rRNA, LSU-rRNA);GO:0000461//endonucleolytic cleavage to generate mature 3'-end of SSU-rRNA from (SSU-rRNA, 5.8S rRNA, LSU-rRNA);GO:0002181//cytoplasmic translation;GO:0006412//translation
7	ENSGALG00000016775	36.9792	17.8064	472	215	0.981	0.74	-1.05432	7.63e-42	1.69e-37	down	RPL31	ribosomal protein L31 [Source:NCBI gene;Acc:418710]	Genetic Information Processing	Translation	ko03010//Ribosome	K02910	GO:0005622//intracellular;GO:0005840//ribosome;GO:0022625//cytosolic large ribosomal subunit;GO:0042788//polysomal ribosome;GO:0045202//synapse	GO:0003735//structural constituent of ribosome	GO:0002181//cytoplasmic translation;GO:0006412//translation
7	ENSGALG00000015339	39.8329	19.29	472	215	0.981	0.795	-1.04611	1.64e-41	3.63e-37	down	RPL24	ribosomal protein L24 [Source:NCBI gene;Acc:418401]	Genetic Information Processing	Translation	ko03010//Ribosome	K02896	GO:0005737//cytoplasm;GO:0005783//endoplasmic reticulum;GO:0005829//cytosol;GO:0022625//cytosolic large ribosomal subunit;GO:0042788//polysomal ribosome;GO:0045202//synapse	GO:0003723//RNA binding;GO:0003735//structural constituent of ribosome	GO:0000027//ribosomal large subunit assembly;GO:0002181//cytoplasmic translation;GO:0006412//translation;GO:0007093//mitotic cell cycle checkpoint;GO:0010458//exit from mitosis;GO:0021554//optic nerve development;GO:0031290//retinal ganglion cell axon guidance;GO:0060041//retina development in camera-type eye;GO:1902626//assembly of large subunit precursor of preribosome
7	ENSGALG00000043654	56.5255	22.8987	472	215	0.9	0.628	-1.30363	1.77e-38	3.93e-34	down	-	-	-	-	-	-	GO:0009897//external side of plasma membrane;GO:0042571//immunoglobulin complex, circulating	GO:0003823//antigen binding;GO:0034987//immunoglobulin receptor binding	GO:0006910//phagocytosis, recognition;GO:0006911//phagocytosis, engulfment;GO:0006958//complement activation, classical pathway;GO:0042742//defense response to bacterium;GO:0045087//innate immune response;GO:0050853//B cell receptor signaling pathway;GO:0050871//positive regulation of B cell activation
7	ENSGALG00000029897	32.1395	15.0375	472	215	0.953	0.735	-1.09578	4.4e-35	9.76e-31	down	RPL30	ribosomal protein L30 [Source:NCBI gene;Acc:425416]	Genetic Information Processing	Translation	ko03010//Ribosome	K02908	GO:0005622//intracellular;GO:0005634//nucleus;GO:0005840//ribosome;GO:0014069//postsynaptic density;GO:0022625//cytosolic large ribosomal subunit;GO:0042788//polysomal ribosome	GO:0003723//RNA binding;GO:0003735//structural constituent of ribosome	GO:0002181//cytoplasmic translation;GO:0006412//translation;GO:0031640//killing of cells of other organism;GO:0050829//defense response to Gram-negative bacterium;GO:0061844//antimicrobial humoral immune response mediated by antimicrobial peptide
7	ENSGALG00000049865	25.7733	11.1897	472	215	0.934	0.609	-1.2037	7.06e-34	1.56e-29	down	RPL18A	ribosomal protein L18a [Source:NCBI gene;Acc:417823]	Genetic Information Processing	Translation	ko03010//Ribosome	K02882	GO:0005840//ribosome;GO:0014069//postsynaptic density;GO:0022625//cytosolic large ribosomal subunit;GO:0042788//polysomal ribosome	GO:0003735//structural constituent of ribosome	GO:0002181//cytoplasmic translation;GO:0006412//translation
7	ENSGALG00000040761	8.43533	1.69469	472	215	0.612	0.13	-2.31542	1.18e-33	2.63e-29	down	DRD4	dopamine receptor D4 [Source:NCBI gene;Acc:423016]	Environmental Information Processing	Signaling molecules and interaction	ko04080//Neuroactive ligand-receptor interaction	K04147	GO:0005886//plasma membrane;GO:0005887//integral component of plasma membrane;GO:0016020//membrane;GO:0016021//integral component of membrane;GO:0030425//dendrite;GO:0098794//postsynapse;GO:0098978//glutamatergic synapse	GO:0001591//dopamine neurotransmitter receptor activity, coupled via Gi/Go;GO:0004930//G protein-coupled receptor activity;GO:0004952//dopamine neurotransmitter receptor activity;GO:0004993//G protein-coupled serotonin receptor activity;GO:0008144//drug binding;GO:0017124//SH3 domain binding;GO:0030594//neurotransmitter receptor activity;GO:0035240//dopamine binding;GO:0042802//identical protein …	GO:0000187//activation of MAPK activity;GO:0001975//response to amphetamine;GO:0007165//signal transduction;GO:0007186//G protein-coupled receptor signaling pathway;GO:0007187//G protein-coupled receptor signaling pathway, coupled to cyclic nucleotide second messenger;GO:0007195//adenylate cyclase-inhibiting dopamine receptor signaling pathway;GO:0007212//dopamine receptor signaling pathway;GO:00…
7	ENSGALG00000005922	25.0247	12.5097	472	215	0.949	0.647	-1.00031	8.71e-32	1.93e-27	down	RPL5	ribosomal protein L5 [Source:NCBI gene;Acc:395269]	Genetic Information Processing	Translation	ko03010//Ribosome	K02932	GO:0005622//intracellular;GO:0005634//nucleus;GO:0005730//nucleolus;GO:0005737//cytoplasm;GO:0005840//ribosome;GO:0022625//cytosolic large ribosomal subunit	GO:0003723//RNA binding;GO:0003735//structural constituent of ribosome;GO:0008097//5S rRNA binding;GO:0019843//rRNA binding	GO:0000027//ribosomal large subunit assembly;GO:0006412//translation
7	ENSGALG00000036711	8.03799	2.04873	472	215	0.608	0.153	-1.97211	1.45e-29	3.22e-25	down	S100A11	S100 calcium binding protein A11 [Source:NCBI gene;Acc:396075]	-	-	-	-	GO:0001726//ruffle;GO:0005634//nucleus;GO:0005737//cytoplasm	GO:0005509//calcium ion binding;GO:0042803//protein homodimerization activity;GO:0044548//S100 protein binding;GO:0046872//metal ion binding;GO:0048306//calcium-dependent protein binding	GO:0042127//regulation of cell proliferation
7	ENSGALG00000030120	25.736	11.6045	472	215	0.93	0.614	-1.1491	1.87e-29	4.15e-25	down	ITGB1BP3	integrin beta 1 binding protein 3 [Source:NCBI gene;Acc:415448]	Metabolism;Metabolism	Global and overview maps;Metabolism of cofactors and vitamins	ko01100//Metabolic pathways;ko00760//Nicotinate and nicotinamide metabolism	K10524;K10524	-	GO:0016301//kinase activity	GO:0016310//phosphorylation
7	ENSGALG00000007418	29.7362	14.5916	472	215	0.945	0.698	-1.02708	1.9e-29	4.22e-25	down	CD3D	CD3d molecule [Source:NCBI gene;Acc:396518]	-	-	-	-	GO:0009897//external side of plasma membrane;GO:0016020//membrane;GO:0016021//integral component of membrane;GO:0042105//alpha-beta T cell receptor complex	GO:0004888//transmembrane signaling receptor activity	GO:0007166//cell surface receptor signaling pathway;GO:0030217//T cell differentiation;GO:0045059//positive thymic T cell selection
7	ENSGALG00000006096	25.2386	12.0476	472	215	0.941	0.674	-1.06688	5.2e-29	1.15e-24	down	RPS13	ribosomal protein S13 [Source:NCBI gene;Acc:414782]	Genetic Information Processing	Translation	ko03010//Ribosome	K02953	GO:0005622//intracellular;GO:0005634//nucleus;GO:0005730//nucleolus;GO:0005840//ribosome;GO:0014069//postsynaptic density;GO:0022627//cytosolic small ribosomal subunit	GO:0003729//mRNA binding;GO:0003735//structural constituent of ribosome;GO:0048027//mRNA 5'-UTR binding;GO:0070181//small ribosomal subunit rRNA binding	GO:0006412//translation;GO:0033119//negative regulation of RNA splicing
7	ENSGALG00000010870	66.3978	33.0382	472	215	0.958	0.842	-1.007	1.49e-28	3.3e-24	down	JUN	Jun proto-oncogene, AP-1 transcription factor subunit [Source:NCBI gene;Acc:424673]	Environmental Information Processing;Cellular Processes;Cellular Processes;Human Diseases;Human Diseases;Environmental Information Processing;Organismal Systems;Cellular Processes;Human Diseases;Organismal Systems;Organismal Systems;Environmental Information Processing;Human Diseases;Cellular Processes	Signal transduction;Cellular community - eukaryotes;Cellular community - eukaryotes;Infectious diseases;Infectious diseases;Signal transduction;Immune system;Cell growth and death;Endocrine and metabolic diseases;Immune system;Endocrine system;Signal transduction;Infectious diseases;Transport and catabolism	ko04010//MAPK signaling pathway;ko04510//Focal adhesion;ko04530//Tight junction;ko05168//Herpes simplex infection;ko05164//Influenza A;ko04310//Wnt signaling pathway;ko04621//NOD-like receptor signaling pathway;ko04210//Apoptosis;ko04933//AGE-RAGE signaling pathway in diabetic complications;ko04620//Toll-like receptor signaling pathway;ko04912//GnRH signaling pathway;ko04012//ErbB signaling pathw…	K04448;K04448;K04448;K04448;K04448;K04448;K04448;K04448;K04448;K04448;K04448;K04448;K04448;K04448	GO:0000790//nuclear chromatin;GO:0005634//nucleus;GO:0005654//nucleoplasm;GO:0005667//transcription factor complex;GO:0005719//nuclear euchromatin;GO:0017053//transcriptional repressor complex;GO:0035976//transcription factor AP-1 complex	GO:0000978//RNA polymerase II proximal promoter sequence-specific DNA binding;GO:0000980//RNA polymerase II distal enhancer sequence-specific DNA binding;GO:0000981//DNA-binding transcription factor activity, RNA polymerase II-specific;GO:0001102//RNA polymerase II activating transcription factor binding;GO:0001228//DNA-binding transcription activator activity, RNA polymerase II-specific;GO:00036…	GO:0000122//negative regulation of transcription by RNA polymerase II;GO:0001525//angiogenesis;GO:0001774//microglial cell activation;GO:0001889//liver development;GO:0001938//positive regulation of endothelial cell proliferation;GO:0003151//outflow tract morphogenesis;GO:0006355//regulation of transcription, DNA-templated;GO:0007179//transforming growth factor beta receptor signaling pathway;GO:…
7	ENSGALG00000037851	8.70694	2.18926	472	215	0.619	0.177	-1.99172	1.3e-27	2.87e-23	down	KK34	interleukin-like [Source:NCBI gene;Acc:407087]	-	-	-	-	-	-	-
7	ENSGALG00000012229	24.2309	11.5598	472	215	0.913	0.66	-1.06774	3.1e-26	6.87e-22	down	RPS29	ribosomal protein S29 [Source:NCBI gene;Acc:776054]	Genetic Information Processing	Translation	ko03010//Ribosome	K02980	GO:0005622//intracellular;GO:0005840//ribosome;GO:0022627//cytosolic small ribosomal subunit	GO:0003735//structural constituent of ribosome;GO:0008270//zinc ion binding	GO:0006412//translation
7	ENSGALG00000023294	13.3855	5.56899	472	215	0.807	0.423	-1.26518	3.77e-24	8.36e-20	down	RPLP0	ribosomal protein lateral stalk subunit P0 [Source:NCBI gene;Acc:395835]	Genetic Information Processing	Translation	ko03010//Ribosome	K02941	GO:0005622//intracellular;GO:0005634//nucleus;GO:0005737//cytoplasm;GO:0005783//endoplasmic reticulum;GO:0005829//cytosol;GO:0005840//ribosome;GO:0014069//postsynaptic density;GO:0022625//cytosolic large ribosomal subunit;GO:0030425//dendrite;GO:0036464//cytoplasmic ribonucleoprotein granule;GO:0098794//postsynapse;GO:1990904//ribonucleoprotein complex	GO:0003735//structural constituent of ribosome;GO:0070180//large ribosomal subunit rRNA binding	GO:0000027//ribosomal large subunit assembly;GO:0002181//cytoplasmic translation;GO:0042254//ribosome biogenesis;GO:0071353//cellular response to interleukin-4
7	ENSGALG00000011190	19.9638	9.58284	472	215	0.886	0.544	-1.05886	4.2e-24	9.31e-20	down	PLAC8	Placenta-specific gene 8-like 2 [Source:NCBI gene;Acc:100857411]	-	-	-	-	GO:0016020//membrane;GO:0016021//integral component of membrane	GO:0003682//chromatin binding	GO:0008284//positive regulation of cell proliferation;GO:0009409//response to cold;GO:0040015//negative regulation of multicellular organism growth;GO:0042742//defense response to bacterium;GO:0043066//negative regulation of apoptotic process;GO:0045944//positive regulation of transcription by RNA polymerase II;GO:0120162//positive regulation of cold-induced thermogenesis
7	ENSGALG00000028204	6.16767	1.4521	472	215	0.566	0.167	-2.08659	1.02e-23	2.27e-19	down	GPX1	glutathione peroxidase 1 [Source:NCBI gene;Acc:100857115]	Metabolism;Metabolism	Lipid metabolism;Metabolism of other amino acids	ko00590//Arachidonic acid metabolism;ko00480//Glutathione metabolism	K00432;K00432	GO:0005737//cytoplasm;GO:0005739//mitochondrion;GO:0005829//cytosol;GO:0097413//Lewy body	GO:0004601//peroxidase activity;GO:0004602//glutathione peroxidase activity;GO:0017124//SH3 domain binding	GO:0000302//response to reactive oxygen species;GO:0001659//temperature homeostasis;GO:0001885//endothelial cell development;GO:0002862//negative regulation of inflammatory response to antigenic stimulus;GO:0006629//lipid metabolic process;GO:0006641//triglyceride metabolic process;GO:0006749//glutathione metabolic process;GO:0006915//apoptotic process;GO:0006979//response to oxidative stress;GO:…
7	ENSGALG00000053682	2.68929	0.358334	472	215	0.333	0.042	-2.90785	3.79e-19	8.4e-15	down	MHCIY	MHC-like class I Y [Source:NCBI gene;Acc:768350]	-	-	-	-	GO:0016020//membrane;GO:0016021//integral component of membrane	-	-
7	ENSGALG00000031368	5.13962	1.61947	472	215	0.504	0.153	-1.66614	7.35e-19	1.63e-14	down	PHF12	PHD finger protein 12 [Source:NCBI gene;Acc:417580]	-	-	-	-	GO:0005634//nucleus;GO:0005654//nucleoplasm;GO:0016580//Sin3 complex;GO:0017053//transcriptional repressor complex;GO:0070822//Sin3-type complex	GO:0001222//transcription corepressor binding;GO:0003714//transcription corepressor activity;GO:0005515//protein binding;GO:0035091//phosphatidylinositol binding;GO:0046872//metal ion binding	GO:0000122//negative regulation of transcription by RNA polymerase II;GO:0045892//negative regulation of transcription, DNA-templated
7	ENSGALG00000042148	5.78727	2.1484	472	215	0.536	0.181	-1.42962	9.15e-19	2.03e-14	down	FKBP51	FK506 binding protein 5 [Source:NCBI gene;Acc:421186]	-	-	-	-	GO:0005654//nucleoplasm;GO:0005737//cytoplasm	GO:0003755//peptidyl-prolyl cis-trans isomerase activity;GO:0005515//protein binding;GO:0005528//FK506 binding;GO:0016853//isomerase activity;GO:0031072//heat shock protein binding	GO:0000413//protein peptidyl-prolyl isomerization;GO:0009617//response to bacterium;GO:0061077//chaperone-mediated protein folding
7	ENSGALG00000002771	9.85154	4.15585	472	215	0.678	0.321	-1.24521	9.52e-18	2.11e-13	down	CRIP1	cysteine rich protein 1 [Source:NCBI gene;Acc:101747696]	-	-	-	-	GO:0005737//cytoplasm	GO:0003680//AT DNA binding;GO:0008270//zinc ion binding;GO:0008301//DNA binding, bending;GO:0042277//peptide binding;GO:0046872//metal ion binding	GO:0008630//intrinsic apoptotic signaling pathway in response to DNA damage;GO:0010043//response to zinc ion;GO:0071236//cellular response to antibiotic;GO:0071493//cellular response to UV-B
7	ENSGALG00000008542	6.54567	3.25267	472	215	0.583	0.237	-1.00892	1.01e-17	2.24e-13	down	ADD3	adducin 3 (gamma) [Source:NCBI gene;Acc:373892]	-	-	-	-	GO:0000794//condensed nuclear chromosome;GO:0005654//nucleoplasm;GO:0005737//cytoplasm;GO:0005856//cytoskeleton;GO:0005886//plasma membrane;GO:0005903//brush border;GO:0005911//cell-cell junction;GO:0005938//cell cortex;GO:0014069//postsynaptic density;GO:0016020//membrane;GO:0044853//plasma membrane raft	GO:0005198//structural molecule activity;GO:0030507//spectrin binding;GO:0051015//actin filament binding	GO:0051016//barbed-end actin filament capping;GO:0051017//actin filament bundle assembly
7	ENSGALG00000045199	4.72537	1.10385	472	215	0.426	0.107	-2.09789	1.62e-17	3.59e-13	down	-	dispanin subfamily A member 2b-like [Source:NCBI gene;Acc:107053353]	-	-	-	-	GO:0016021//integral component of membrane	-	-
7	ENSGALG00000005683	5.64119	2.13647	472	215	0.521	0.186	-1.40077	1.25e-16	2.76e-12	down	ARHGAP29	Rho GTPase activating protein 29 [Source:NCBI gene;Acc:424488]	-	-	-	-	GO:0005737//cytoplasm;GO:0032991//protein-containing complex	GO:0005096//GTPase activator activity;GO:0030165//PDZ domain binding;GO:0046872//metal ion binding	GO:0007165//signal transduction;GO:0035556//intracellular signal transduction;GO:0043547//positive regulation of GTPase activity
7	ENSGALG00000041577	4.8621	1.57843	472	215	0.466	0.144	-1.62308	1.49e-16	3.3e-12	down	ITGA4	integrin subunit alpha 4 [Source:NCBI gene;Acc:424121]	Cellular Processes;Cellular Processes;Environmental Information Processing;Environmental Information Processing;Organismal Systems	Cell motility;Cellular community - eukaryotes;Signaling molecules and interaction;Signaling molecules and interaction;Immune system	ko04810//Regulation of actin cytoskeleton;ko04510//Focal adhesion;ko04514//Cell adhesion molecules (CAMs);ko04512//ECM-receptor interaction;ko04672//Intestinal immune network for IgA production	K06483;K06483;K06483;K06483;K06483	GO:0005886//plasma membrane;GO:0008305//integrin complex;GO:0009986//cell surface;GO:0016020//membrane;GO:0016021//integral component of membrane;GO:0034669//integrin alpha4-beta7 complex	GO:0019960//C-X3-C chemokine binding;GO:0050839//cell adhesion molecule binding	GO:0003366//cell-matrix adhesion involved in ameboidal cell migration;GO:0007155//cell adhesion;GO:0007159//leukocyte cell-cell adhesion;GO:0007160//cell-matrix adhesion;GO:0007229//integrin-mediated signaling pathway;GO:0033631//cell-cell adhesion mediated by integrin;GO:0034113//heterotypic cell-cell adhesion;GO:0034446//substrate adhesion-dependent cell spreading;GO:0035987//endodermal cell di…
7	ENSGALG00000026970	12.2298	5.88748	472	215	0.761	0.437	-1.05467	5.45e-16	1.21e-11	down	IFITM3	interferon-induced transmembrane protein 3 [Source:NCBI gene;Acc:770612]	-	-	-	-	GO:0005886//plasma membrane;GO:0016020//membrane;GO:0016021//integral component of membrane	-	GO:0030282//bone mineralization;GO:0060349//bone morphogenesis
7	ENSGALG00000049751	10.0444	4.06629	472	215	0.672	0.372	-1.3046	4.42e-15	9.8e-11	down	-	histone cluster 1, H2bf [Source:NCBI gene;Acc:769973]	-	-	-	-	GO:0000786//nucleosome	GO:0003677//DNA binding;GO:0046982//protein heterodimerization activity	-
7	ENSGALG00000027064	10.7172	4.94558	472	215	0.71	0.395	-1.11572	8.54e-15	1.89e-10	down	HIST1H3H	histone cluster 1 H3 family member h [Source:NCBI gene;Acc:100858681]	-	-	-	-	GO:0000786//nucleosome;GO:0005634//nucleus;GO:0005694//chromosome	GO:0003677//DNA binding;GO:0031492//nucleosomal DNA binding;GO:0046982//protein heterodimerization activity	-
7	ENSGALG00000012357	6.55225	2.86656	472	215	0.53	0.214	-1.19267	1.38e-14	3.05e-10	down	CXCR4	C-X-C motif chemokine receptor 4 [Source:NCBI gene;Acc:395324]	Cellular Processes;Environmental Information Processing;Cellular Processes;Environmental Information Processing;Organismal Systems	Transport and catabolism;Signaling molecules and interaction;Cell motility;Signal transduction;Immune system	ko04144//Endocytosis;ko04060//Cytokine-cytokine receptor interaction;ko04810//Regulation of actin cytoskeleton;ko04020//Calcium signaling pathway;ko04672//Intestinal immune network for IgA production	K04189;K04189;K04189;K04189;K04189	GO:0005764//lysosome;GO:0005769//early endosome;GO:0005770//late endosome;GO:0005886//plasma membrane;GO:0009897//external side of plasma membrane;GO:0009986//cell surface;GO:0016020//membrane;GO:0016021//integral component of membrane;GO:0031252//cell leading edge;GO:0031410//cytoplasmic vesicle;GO:0032991//protein-containing complex	GO:0003779//actin binding;GO:0004930//G protein-coupled receptor activity;GO:0004950//chemokine receptor activity;GO:0016493//C-C chemokine receptor activity;GO:0019955//cytokine binding;GO:0019956//chemokine binding;GO:0019957//C-C chemokine binding;GO:0031625//ubiquitin protein ligase binding;GO:0032027//myosin light chain binding;GO:0038147//C-X-C motif chemokine 12 receptor activity;GO:004313…	GO:0001666//response to hypoxia;GO:0006935//chemotaxis;GO:0006955//immune response;GO:0007154//cell communication;GO:0007165//signal transduction;GO:0007186//G protein-coupled receptor signaling pathway;GO:0007204//positive regulation of cytosolic calcium ion concentration;GO:0007420//brain development;GO:0014812//muscle cell migration;GO:0019722//calcium-mediated signaling;GO:0022008//neurogenes…
7	ENSGALG00000029343	3.2667	1.0377	472	215	0.379	0.107	-1.65444	7.4e-14	1.64e-09	down	EIF3K	transglutaminase 2 [Source:NCBI gene;Acc:396432]	-	-	-	-	GO:0005634//nucleus;GO:0005737//cytoplasm;GO:0005829//cytosol;GO:0005852//eukaryotic translation initiation factor 3 complex;GO:0016282//eukaryotic 43S preinitiation complex;GO:0033290//eukaryotic 48S preinitiation complex	GO:0003723//RNA binding;GO:0003743//translation initiation factor activity;GO:0043022//ribosome binding	GO:0001732//formation of cytoplasmic translation initiation complex;GO:0002183//cytoplasmic translational initiation;GO:0006412//translation;GO:0006413//translational initiation;GO:0006446//regulation of translational initiation
7	ENSGALG00000026311	3.85302	1.17791	472	215	0.405	0.126	-1.70976	1.49e-13	3.31e-09	down	C12orf75	chromosome 12 open reading frame 75 [Source:NCBI gene;Acc:771624]	-	-	-	-	-	-	-
7	ENSGALG00000036093	3.75876	1.57157	472	215	0.417	0.144	-1.25805	1.91e-13	4.22e-09	down	PTPN7	protein tyrosine phosphatase, non-receptor type 7 [Source:NCBI gene;Acc:770905]	Environmental Information Processing	Signal transduction	ko04010//MAPK signaling pathway	K18019	GO:0005737//cytoplasm;GO:0005829//cytosol;GO:0009898//cytoplasmic side of plasma membrane	GO:0004721//phosphoprotein phosphatase activity;GO:0004725//protein tyrosine phosphatase activity;GO:0016787//hydrolase activity;GO:0016791//phosphatase activity	GO:0006470//protein dephosphorylation;GO:0016311//dephosphorylation;GO:0035335//peptidyl-tyrosine dephosphorylation
7	ENSGALG00000007863	4.99967	2.01279	472	215	0.504	0.205	-1.31263	2.15e-13	4.77e-09	down	COX7B	cytochrome c oxidase subunit 7B [Source:NCBI gene;Acc:771947]	Metabolism;Metabolism;Organismal Systems	Global and overview maps;Energy metabolism;Circulatory system	ko01100//Metabolic pathways;ko00190//Oxidative phosphorylation;ko04260//Cardiac muscle contraction	K02271;K02271;K02271	GO:0005746//mitochondrial respiratory chain;GO:0016020//membrane;GO:0016021//integral component of membrane;GO:0045277//respiratory chain complex IV	GO:0004129//cytochrome-c oxidase activity	GO:0022900//electron transport chain;GO:1902600//proton transmembrane transport
7	ENSGALG00000004167	4.48592	1.53752	472	215	0.47	0.181	-1.5448	5.05e-13	1.12e-08	down	-	serglycin [Source:NCBI gene;Acc:423695]	-	-	-	-	-	-	-
7	ENSGALG00000035996	3.09502	1.12242	472	215	0.381	0.121	-1.46333	1.08e-12	2.4e-08	down	COX6C	cytochrome c oxidase subunit 6C [Source:NCBI gene;Acc:420243]	Metabolism;Metabolism;Organismal Systems	Global and overview maps;Energy metabolism;Circulatory system	ko01100//Metabolic pathways;ko00190//Oxidative phosphorylation;ko04260//Cardiac muscle contraction	K02268;K02268;K02268	-	GO:0004129//cytochrome-c oxidase activity	GO:0022900//electron transport chain;GO:1902600//proton transmembrane transport
7	ENSGALG00000035317	9.75527	4.83386	472	215	0.674	0.377	-1.013	1.57e-12	3.48e-08	down	ID3	inhibitor of DNA binding 3, HLH protein [Source:NCBI gene;Acc:395281]	Environmental Information Processing	Signal transduction	ko04350//TGF-beta signaling pathway	K17694	GO:0005634//nucleus;GO:0005737//cytoplasm	GO:0001085//RNA polymerase II transcription factor binding;GO:0003700//DNA-binding transcription factor activity;GO:0008134//transcription factor binding;GO:0046983//protein dimerization activity	GO:0007623//circadian rhythm;GO:0010628//positive regulation of gene expression;GO:0030182//neuron differentiation;GO:0043392//negative regulation of DNA binding;GO:0045665//negative regulation of neuron differentiation;GO:0045892//negative regulation of transcription, DNA-templated;GO:0051726//regulation of cell cycle
7	ENSGALG00000038635	4.22753	1.39269	472	215	0.439	0.163	-1.60195	2.05e-12	4.53e-08	down	-	myosin light chain 12B [Source:NCBI gene;Acc:770011]	Cellular Processes;Cellular Processes;Cellular Processes	Cell motility;Cellular community - eukaryotes;Cellular community - eukaryotes	ko04810//Regulation of actin cytoskeleton;ko04510//Focal adhesion;ko04530//Tight junction	K12757;K12757;K12757	-	GO:0005509//calcium ion binding	-
7	ENSGALG00000027571	8.39785	3.95097	472	215	0.625	0.33	-1.08781	2.61e-12	5.79e-08	down	-	histone cluster 1, H2B-VII-like 2 [Source:NCBI gene;Acc:770188]	-	-	-	-	GO:0000786//nucleosome;GO:0005634//nucleus;GO:0005694//chromosome	GO:0003677//DNA binding;GO:0046982//protein heterodimerization activity	GO:0006334//nucleosome assembly;GO:0042742//defense response to bacterium
7	ENSGALG00000014944	2.05506	0.388954	472	215	0.254	0.047	-2.40151	1.02e-11	2.27e-07	down	GCNT4	glucosaminyl (N-acetyl) transferase 4, core 2 [Source:NCBI gene;Acc:427207]	Metabolism;Metabolism	Global and overview maps;Glycan biosynthesis and metabolism	ko01100//Metabolic pathways;ko00512//Mucin type O-glycan biosynthesis	K09663;K09663	GO:0016020//membrane	GO:0008375//acetylglucosaminyltransferase activity	GO:0002121//inter-male aggressive behavior;GO:0042403//thyroid hormone metabolic process;GO:0048729//tissue morphogenesis;GO:0048872//homeostasis of number of cells;GO:0060993//kidney morphogenesis
7	ENSGALG00000017644	7.17809	3.45067	472	215	0.585	0.298	-1.05672	1.47e-11	3.25e-07	down	COTL1	coactosin like F-actin binding protein 1 [Source:NCBI gene;Acc:768420]	-	-	-	-	GO:0005622//intracellular	GO:0003779//actin binding;GO:0019899//enzyme binding	GO:0001755//neural crest cell migration;GO:0030041//actin filament polymerization;GO:0050832//defense response to fungus
7	ENSGALG00000012296	3.52391	1.58446	472	215	0.4	0.149	-1.15318	1.61e-11	3.57e-07	down	EIF3L	eukaryotic translation initiation factor 3 subunit L [Source:NCBI gene;Acc:418033]	-	-	-	-	GO:0001650//fibrillar center;GO:0005654//nucleoplasm;GO:0005730//nucleolus;GO:0005737//cytoplasm;GO:0005852//eukaryotic translation initiation factor 3 complex;GO:0016282//eukaryotic 43S preinitiation complex;GO:0033290//eukaryotic 48S preinitiation complex	GO:0003743//translation initiation factor activity;GO:0005515//protein binding	GO:0001732//formation of cytoplasmic translation initiation complex;GO:0002183//cytoplasmic translational initiation;GO:0006412//translation;GO:0006413//translational initiation
7	ENSGALG00000016485	3.38962	0.796295	472	215	0.29	0.07	-2.08975	2.67e-11	5.93e-07	down	RHOB	ras homolog family member B [Source:NCBI gene;Acc:395734]	-	-	-	-	GO:0005622//intracellular;GO:0005634//nucleus;GO:0005737//cytoplasm;GO:0005769//early endosome;GO:0005770//late endosome;GO:0005886//plasma membrane;GO:0005938//cell cortex;GO:0010008//endosome membrane;GO:0016020//membrane;GO:0032153//cell division site;GO:0032154//cleavage furrow;GO:0043231//intracellular membrane-bounded organelle	GO:0000166//nucleotide binding;GO:0003924//GTPase activity;GO:0005525//GTP binding;GO:0019003//GDP binding;GO:0019901//protein kinase binding	GO:0000281//mitotic cytokinesis;GO:0006886//intracellular protein transport;GO:0007015//actin filament organization;GO:0007155//cell adhesion;GO:0007264//small GTPase mediated signal transduction;GO:0007266//Rho protein signal transduction;GO:0008333//endosome to lysosome transport;GO:0008360//regulation of cell shape;GO:0010595//positive regulation of endothelial cell migration;GO:0016477//cell …
7	ENSGALG00000010238	7.39049	3.61902	472	215	0.593	0.316	-1.03007	7.16e-11	1.59e-06	down	NAP1L1	nucleosome assembly protein 1 like 1 [Source:NCBI gene;Acc:417864]	-	-	-	-	GO:0005634//nucleus;GO:0005737//cytoplasm	-	GO:0006334//nucleosome assembly;GO:0050769//positive regulation of neurogenesis;GO:2000179//positive regulation of neural precursor cell proliferation
7	ENSGALG00000032645	5.95509	2.78721	472	215	0.464	0.2	-1.0953	7.8e-11	1.73e-06	down	H2A-VII	histone cluster 1, H2A-IV-like 3 [Source:NCBI gene;Acc:417955]	Cellular Processes	Cell growth and death	ko04217//Necroptosis	K11251	GO:0000786//nucleosome;GO:0000790//nuclear chromatin;GO:0005634//nucleus;GO:0005694//chromosome	GO:0003677//DNA binding;GO:0046982//protein heterodimerization activity	GO:0006325//chromatin organization
7	ENSGALG00000027963	5.19468	2.47394	472	215	0.498	0.242	-1.07023	9.02e-10	2e-05	down	COX7C	cytochrome c oxidase subunit 7C [Source:NCBI gene;Acc:431629]	Metabolism;Metabolism;Organismal Systems	Global and overview maps;Energy metabolism;Circulatory system	ko01100//Metabolic pathways;ko00190//Oxidative phosphorylation;ko04260//Cardiac muscle contraction	K02272;K02272;K02272	GO:0005739//mitochondrion;GO:0016020//membrane;GO:0016021//integral component of membrane	GO:0004129//cytochrome-c oxidase activity	GO:0006123//mitochondrial electron transport, cytochrome c to oxygen;GO:1902600//proton transmembrane transport
7	ENSGALG00000037167	5.06418	1.94813	472	215	0.419	0.177	-1.37824	9.85e-10	2.18e-05	down	HIST1H103	histone cluster 1, H1.03 [Source:NCBI gene;Acc:100858354]	-	-	-	-	GO:0000786//nucleosome;GO:0005634//nucleus;GO:0005694//chromosome	GO:0003677//DNA binding;GO:0003690//double-stranded DNA binding;GO:0005515//protein binding;GO:0031492//nucleosomal DNA binding	GO:0006334//nucleosome assembly;GO:0006355//regulation of transcription, DNA-templated;GO:0016584//nucleosome positioning;GO:0030261//chromosome condensation;GO:0031936//negative regulation of chromatin silencing;GO:0045910//negative regulation of DNA recombination
7	ENSGALG00000049859	5.02521	2.24845	472	215	0.481	0.228	-1.16026	1.05e-09	2.33e-05	down	H2A-IX	H2A histone family, member J [Source:NCBI gene;Acc:417947]	Cellular Processes	Cell growth and death	ko04217//Necroptosis	K11251	GO:0000786//nucleosome;GO:0000790//nuclear chromatin;GO:0005634//nucleus;GO:0005654//nucleoplasm;GO:0005694//chromosome	GO:0003677//DNA binding;GO:0046982//protein heterodimerization activity	GO:0006325//chromatin organization
7	ENSGALG00000031159	3.22815	1.19421	472	215	0.341	0.121	-1.43465	1.85e-09	4.1e-05	down	HIST1H110	histone cluster 1, H1.10 [Source:NCBI gene;Acc:417948]	-	-	-	-	GO:0000786//nucleosome;GO:0005634//nucleus;GO:0005694//chromosome	GO:0003677//DNA binding;GO:0003690//double-stranded DNA binding;GO:0005515//protein binding;GO:0031492//nucleosomal DNA binding	GO:0006334//nucleosome assembly;GO:0006355//regulation of transcription, DNA-templated;GO:0016584//nucleosome positioning;GO:0030261//chromosome condensation;GO:0031936//negative regulation of chromatin silencing;GO:0045910//negative regulation of DNA recombination
7	ENSGALG00000006583	3.69112	1.73759	472	215	0.386	0.158	-1.08698	1.98e-09	4.39e-05	down	LSP1	lymphocyte specific protein 1 [Source:NCBI gene;Acc:374254]	-	-	-	-	GO:0005886//plasma membrane	GO:0003779//actin binding	GO:0007165//signal transduction
7	ENSGALG00000049408	5.00092	1.99469	472	215	0.443	0.2	-1.32603	2e-09	4.43e-05	down	HIST1H2B8	histone cluster 1, H2B-VIII [Source:NCBI gene;Acc:427886]	-	-	-	-	GO:0000786//nucleosome;GO:0005634//nucleus;GO:0005694//chromosome	GO:0003677//DNA binding;GO:0046982//protein heterodimerization activity	GO:0006334//nucleosome assembly
7	ENSGALG00000011404	1.9497	0.893027	472	215	0.267	0.088	-1.12648	2.05e-09	4.55e-05	down	HOPX	HOP homeobox [Source:NCBI gene;Acc:395241]	-	-	-	-	GO:0005634//nucleus;GO:0005737//cytoplasm	GO:0003677//DNA binding	GO:0000122//negative regulation of transcription by RNA polymerase II;GO:0007275//multicellular organism development;GO:0007507//heart development;GO:0008016//regulation of heart contraction;GO:0016575//histone deacetylation;GO:0030154//cell differentiation;GO:0043393//regulation of protein binding;GO:0043415//positive regulation of skeletal muscle tissue regeneration;GO:0045596//negative regulat…
7	ENSGALG00000042491	3.03472	1.03059	472	215	0.333	0.116	-1.5581	2.35e-09	5.22e-05	down	-	histone cluster 1, H4d [Source:NCBI gene;Acc:427884]	-	-	-	-	GO:0000786//nucleosome;GO:0005634//nucleus;GO:0005654//nucleoplasm;GO:0005694//chromosome	GO:0003677//DNA binding;GO:0046982//protein heterodimerization activity	GO:0006334//nucleosome assembly;GO:0006352//DNA-templated transcription, initiation
7	ENSGALG00000003570	2.79966	0.913836	472	215	0.316	0.107	-1.61525	4.78e-09	0.000105896	down	PURH	5-aminoimidazole-4-carboxamide ribonucleotide formyltransferase/IMP cyclohydrolase [Source:NCBI gene;Acc:396091]	Metabolism;Metabolism;Metabolism	Global and overview maps;Nucleotide metabolism;Metabolism of cofactors and vitamins	ko01100//Metabolic pathways;ko00230//Purine metabolism;ko00670//One carbon pool by folate	K00602;K00602;K00602	GO:0005829//cytosol;GO:0005886//plasma membrane	GO:0003824//catalytic activity;GO:0003937//IMP cyclohydrolase activity;GO:0004643//phosphoribosylaminoimidazolecarboxamide formyltransferase activity;GO:0016787//hydrolase activity;GO:0042803//protein homodimerization activity	GO:0006164//purine nucleotide biosynthetic process;GO:0098761//cellular response to interleukin-7
7	ENSGALG00000032588	4.79558	2.34277	472	215	0.481	0.237	-1.03349	5.49e-09	0.000121771	down	ARPC1B	actin related protein 2/3 complex subunit 1B [Source:NCBI gene;Acc:416490]	Cellular Processes;Cellular Processes;Human Diseases	Transport and catabolism;Cell motility;Infectious diseases	ko04144//Endocytosis;ko04810//Regulation of actin cytoskeleton;ko05132//Salmonella infection	K05757;K05757;K05757	GO:0005737//cytoplasm;GO:0005856//cytoskeleton;GO:0005885//Arp2/3 protein complex;GO:0015629//actin cytoskeleton	GO:0003779//actin binding;GO:0005200//structural constituent of cytoskeleton;GO:0005515//protein binding;GO:0051015//actin filament binding	GO:0030833//regulation of actin filament polymerization;GO:0034314//Arp2/3 complex-mediated actin nucleation
7	ENSGALG00000030824	1.85113	0.689761	472	215	0.254	0.074	-1.42424	8.2e-09	0.000181692	down	SF3B5	splicing factor 3b subunit 5 [Source:NCBI gene;Acc:769794]	Genetic Information Processing	Transcription	ko03040//Spliceosome	K12832	GO:0005634//nucleus;GO:0005654//nucleoplasm;GO:0005681//spliceosomal complex;GO:0005686//U2 snRNP;GO:0005689//U12-type spliceosomal complex;GO:0071005//U2-type precatalytic spliceosome;GO:0071011//precatalytic spliceosome	GO:0003723//RNA binding	GO:0000398//mRNA splicing, via spliceosome;GO:0006397//mRNA processing;GO:0008380//RNA splicing
7	ENSGALG00000025999	2.9064	1.08084	472	215	0.343	0.13	-1.42709	9.96e-09	0.000220802	down	NDUFA4	NDUFA4, mitochondrial complex associated [Source:NCBI gene;Acc:772135]	Metabolism;Metabolism	Global and overview maps;Energy metabolism	ko01100//Metabolic pathways;ko00190//Oxidative phosphorylation	K03948;K03948	GO:0005739//mitochondrion;GO:0005747//mitochondrial respiratory chain complex I;GO:0005751//mitochondrial respiratory chain complex IV;GO:0016020//membrane;GO:0016021//integral component of membrane	GO:0004129//cytochrome-c oxidase activity;GO:0044877//protein-containing complex binding	GO:0022900//electron transport chain;GO:1902600//proton transmembrane transport
7	ENSGALG00000051325	2.8804	0.926341	472	215	0.294	0.098	-1.63666	1.53e-08	0.000339868	down	-	histone cluster 1 H3 family member a [Source:NCBI gene;Acc:768333]	-	-	-	-	GO:0000786//nucleosome;GO:0005634//nucleus;GO:0005694//chromosome	GO:0003677//DNA binding;GO:0031492//nucleosomal DNA binding;GO:0046982//protein heterodimerization activity	-
7	ENSGALG00000013512	3.07311	1.50701	472	215	0.375	0.167	-1.02801	3.87e-08	0.000858847	down	BTF3	basic transcription factor 3 [Source:NCBI gene;Acc:426154]	-	-	-	-	GO:0005829//cytosol	-	-
7	ENSGALG00000004971	4.28472	1.9984	472	215	0.449	0.223	-1.10036	4.23e-08	0.000937854	down	URM1	ubiquitin related modifier 1 [Source:NCBI gene;Acc:417221]	Genetic Information Processing	Folding, sorting and degradation	ko04122//Sulfur relay system	K12161	GO:0005737//cytoplasm;GO:0005829//cytosol	GO:0097163//sulfur carrier activity	GO:0002098//tRNA wobble uridine modification;GO:0008033//tRNA processing;GO:0032447//protein urmylation;GO:0034227//tRNA thio-modification
7	ENSGALG00000013624	2.9662	1.21842	472	215	0.324	0.126	-1.28361	4.28e-08	0.000948937	down	FAM65B	family with sequence similarity 65, member B [Source:NCBI gene;Acc:421003]	-	-	-	-	GO:0016020//membrane;GO:0016021//integral component of membrane;GO:0032420//stereocilium	GO:0042802//identical protein binding	GO:0007162//negative regulation of cell adhesion;GO:0007605//sensory perception of sound;GO:0035024//negative regulation of Rho protein signal transduction;GO:0045184//establishment of protein localization;GO:0048741//skeletal muscle fiber development;GO:0051260//protein homooligomerization;GO:0051491//positive regulation of filopodium assembly;GO:0060088//auditory receptor cell stereocilium orga…
7	ENSGALG00000040993	2.73889	0.945684	472	215	0.275	0.093	-1.53416	7.15e-08	0.00158589	down	BAMBI	BMP and activin membrane bound inhibitor [Source:NCBI gene;Acc:428413]	Environmental Information Processing;Environmental Information Processing	Signal transduction;Signal transduction	ko04310//Wnt signaling pathway;ko04350//TGF-beta signaling pathway	K10162;K10162	GO:0005737//cytoplasm;GO:0005886//plasma membrane;GO:0016020//membrane;GO:0016021//integral component of membrane	GO:0005109//frizzled binding	GO:0008284//positive regulation of cell proliferation;GO:0008360//regulation of cell shape;GO:0010718//positive regulation of epithelial to mesenchymal transition;GO:0016477//cell migration;GO:0030512//negative regulation of transforming growth factor beta receptor signaling pathway;GO:0032092//positive regulation of protein binding;GO:0045893//positive regulation of transcription, DNA-templated;…
7	ENSGALG00000011921	3.47569	1.72446	472	215	0.371	0.163	-1.01116	7.28e-08	0.00161369	down	DHRS7	dehydrogenase/reductase 7 [Source:NCBI gene;Acc:423527]	-	-	-	-	-	GO:0016491//oxidoreductase activity	GO:0055114//oxidation-reduction process
7	ENSGALG00000013086	2.21654	0.998936	472	215	0.261	0.093	-1.14985	1.26e-07	0.00278211	down	IKZF1	IKAROS family zinc finger 1 [Source:NCBI gene;Acc:395974]	-	-	-	-	GO:0005634//nucleus;GO:0005654//nucleoplasm;GO:0031618//nuclear pericentric heterochromatin;GO:0032991//protein-containing complex	GO:0003676//nucleic acid binding;GO:0003677//DNA binding;GO:0019904//protein domain specific binding	GO:0030098//lymphocyte differentiation;GO:0030218//erythrocyte differentiation;GO:0051291//protein heterooligomerization
7	ENSGALG00000015906	3.13087	1.33569	472	215	0.347	0.149	-1.22897	1.94e-07	0.00429573	down	COX7A2	cytochrome c oxidase subunit 7A2 [Source:NCBI gene;Acc:772260]	Metabolism;Organismal Systems	Energy metabolism;Circulatory system	ko00190//Oxidative phosphorylation;ko04260//Cardiac muscle contraction	K02270;K02270	GO:0005746//mitochondrial respiratory chain;GO:0016020//membrane;GO:0016021//integral component of membrane	GO:0004129//cytochrome-c oxidase activity;GO:0009055//electron transfer activity	GO:0022900//electron transport chain;GO:1902600//proton transmembrane transport
7	ENSGALG00000015372	3.34689	1.64057	472	215	0.379	0.177	-1.02863	2.98e-07	0.00661108	down	ATP5ME	ATP synthase membrane subunit e [Source:NCBI gene;Acc:769146]	Metabolism;Metabolism	Global and overview maps;Energy metabolism	ko01100//Metabolic pathways;ko00190//Oxidative phosphorylation	K02129;K02129	GO:0000276//mitochondrial proton-transporting ATP synthase complex, coupling factor F(o);GO:0000790//nuclear chromatin;GO:0005739//mitochondrion;GO:0005753//mitochondrial proton-transporting ATP synthase complex;GO:0032993//protein-DNA complex	GO:0015078//proton transmembrane transporter activity;GO:0016887//ATPase activity;GO:0031490//chromatin DNA binding;GO:0033142//progesterone receptor binding	GO:0015986//ATP synthesis coupled proton transport
7	ENSGALG00000053706	2.1801	0.762056	472	215	0.256	0.088	-1.51643	3.89e-07	0.00862497	down	ATP5MPL	ATP synthase membrane subunit 6.8PL [Source:NCBI gene;Acc:772187]	-	-	-	-	GO:0005739//mitochondrion;GO:0016020//membrane;GO:0016021//integral component of membrane	-	-
7	ENSGALG00000050981	3.24115	1.60882	472	215	0.282	0.116	-1.0105	7.87e-07	0.0174418	down	-	-	-	-	-	-	GO:0016020//membrane	GO:0005044//scavenger receptor activity	-
7	ENSGALG00000028937	2.42904	0.976924	472	215	0.282	0.116	-1.31407	3.56e-06	0.0788056	down	TIMM13	translocase of inner mitochondrial membrane 13 [Source:NCBI gene;Acc:100859352]	-	-	-	-	GO:0001650//fibrillar center;GO:0005739//mitochondrion;GO:0005743//mitochondrial inner membrane;GO:0005758//mitochondrial intermembrane space;GO:0042719//mitochondrial intermembrane space protein transporter complex	GO:0008565//protein transporter activity;GO:0046872//metal ion binding	GO:0015031//protein transport;GO:0045039//protein import into mitochondrial inner membrane;GO:0072321//chaperone-mediated protein transport
7	ENSGALG00000010175	2.6968	1.15444	472	215	0.254	0.102	-1.22405	5.59e-06	0.123993	down	HSP90AB1	heat shock protein 90 alpha family class B member 1 [Source:NCBI gene;Acc:396188]	Genetic Information Processing;Cellular Processes;Organismal Systems;Organismal Systems	Folding, sorting and degradation;Cell growth and death;Immune system;Endocrine system	ko04141//Protein processing in endoplasmic reticulum;ko04217//Necroptosis;ko04621//NOD-like receptor signaling pathway;ko04914//Progesterone-mediated oocyte maturation	K04079;K04079;K04079;K04079	GO:0005576//extracellular region;GO:0005634//nucleus;GO:0005737//cytoplasm;GO:0005829//cytosol;GO:0008180//COP9 signalosome;GO:0032991//protein-containing complex;GO:0034751//aryl hydrocarbon receptor complex;GO:0043025//neuronal cell body;GO:0044294//dendritic growth cone;GO:0044295//axonal growth cone;GO:0048471//perinuclear region of cytoplasm;GO:1990565//HSP90-CDC37 chaperone complex	GO:0003725//double-stranded RNA binding;GO:0005524//ATP binding;GO:0019887//protein kinase regulator activity;GO:0019900//kinase binding;GO:0019901//protein kinase binding;GO:0031072//heat shock protein binding;GO:0031625//ubiquitin protein ligase binding;GO:0042277//peptide binding;GO:0042802//identical protein binding;GO:0042803//protein homodimerization activity;GO:0042826//histone deacetylase…	GO:0006457//protein folding;GO:0007004//telomere maintenance via telomerase;GO:0010033//response to organic substance;GO:0019062//virion attachment to host cell;GO:0021955//central nervous system neuron axonogenesis;GO:0030010//establishment of cell polarity;GO:0030511//positive regulation of transforming growth factor beta receptor signaling pathway;GO:0031396//regulation of protein ubiquitinati…

## Sheet: Cluster 8
Cluster	GeneID	control	ALV-J	cells.1	cells.2	pct.1	pct.2	log2FC	p_value	p_val_adjust	significance	Symbol	Description	KEGG_A_class	KEGG_B_class	Pathway	K_ID	GO Component	GO Function	GO Process
8	ENSGALG00000040136	0.0473877	2.61421	115	39	0.009	0.256	5.78572	9.34e-06	0.207111	up	PSTPIP2	proline-serine-threonine phosphatase interacting protein 2 [Source:NCBI gene;Acc:770399]	-	-	-	-	GO:0005737//cytoplasm;GO:0005829//cytosol;GO:0005856//cytoskeleton;GO:0005884//actin filament;GO:0005886//plasma membrane;GO:0016020//membrane	GO:0003779//actin binding;GO:0008092//cytoskeletal protein binding;GO:0051015//actin filament binding	GO:0007010//cytoskeleton organization;GO:0016477//cell migration;GO:0030041//actin filament polymerization
8	ENSGALG00000052801	0.348808	2.77417	115	39	0.035	0.282	2.99155	0.000172037	1	up	-	-	-	-	-	-	-	-	-
8	ENSGALG00000038671	1.03134	4.84178	115	39	0.061	0.333	2.23102	0.000259417	1	up	-	uncharacterized LOC422090 [Source:NCBI gene;Acc:422090]	-	-	-	-	-	-	-
8	ENSGALG00000026077	2.3461	6.79904	115	39	0.191	0.538	1.53507	0.000272147	1	up	ALDOC	aldolase, fructose-bisphosphate C [Source:NCBI gene;Acc:395492]	Metabolism;Metabolism;Metabolism;Metabolism;Metabolism;Metabolism	Global and overview maps;Global and overview maps;Global and overview maps;Carbohydrate metabolism;Carbohydrate metabolism;Carbohydrate metabolism	ko01100//Metabolic pathways;ko01200//Carbon metabolism;ko01230//Biosynthesis of amino acids;ko00010//Glycolysis / Gluconeogenesis;ko00051//Fructose and mannose metabolism;ko00030//Pentose phosphate pathway	K01623;K01623;K01623;K01623;K01623;K01623	-	GO:0003824//catalytic activity;GO:0004332//fructose-bisphosphate aldolase activity;GO:0008092//cytoskeletal protein binding;GO:0016829//lyase activity	GO:0006096//glycolytic process;GO:0030388//fructose 1,6-bisphosphate metabolic process;GO:0030855//epithelial cell differentiation
8	ENSGALG00000000944	0.727346	1.5394	115	39	0.07	0.308	1.08165	0.00127792	1	up	SUPT4H1	SPT4 homolog, DSIF elongation factor subunit [Source:NCBI gene;Acc:417470]	-	-	-	-	GO:0005634//nucleus;GO:0032044//DSIF complex	GO:0000993//RNA polymerase II complex binding;GO:0003727//single-stranded RNA binding;GO:0008270//zinc ion binding	GO:0006325//chromatin organization;GO:0006355//regulation of transcription, DNA-templated;GO:0032786//positive regulation of DNA-templated transcription, elongation
8	ENSGALG00000010190	0.744997	2.68492	115	39	0.043	0.256	1.84958	0.00153225	1	up	TBC1D15	TBC1 domain family member 15 [Source:NCBI gene;Acc:417857]	Cellular Processes	Transport and catabolism	ko04137//Mitophagy - animal	K20168	GO:0005576//extracellular region;GO:0005737//cytoplasm	GO:0005096//GTPase activator activity;GO:0017137//Rab GTPase binding	GO:0006886//intracellular protein transport;GO:0043087//regulation of GTPase activity;GO:0090630//activation of GTPase activity
8	ENSGALG00000013605	0.959463	3.95022	115	39	0.061	0.282	2.04164	0.00250567	1	up	CARMIL1	capping protein regulator and myosin 1 linker 1 [Source:NCBI gene;Acc:421002]	-	-	-	-	GO:0005634//nucleus;GO:0005829//cytosol;GO:0005886//plasma membrane;GO:0016607//nuclear speck;GO:0030027//lamellipodium;GO:0031252//cell leading edge;GO:0031941//filamentous actin;GO:0044354//macropinosome	GO:0005515//protein binding;GO:0044877//protein-containing complex binding	GO:0016477//cell migration;GO:0030032//lamellipodium assembly;GO:0030335//positive regulation of cell migration;GO:0030838//positive regulation of actin filament polymerization;GO:0031529//ruffle organization;GO:0044351//macropinocytosis;GO:0046415//urate metabolic process;GO:0051496//positive regulation of stress fiber assembly;GO:0051638//barbed-end actin filament uncapping;GO:0051639//actin fi…
8	ENSGALG00000015864	0.674459	3.96396	115	39	0.078	0.282	2.55514	0.00630452	1	up	IBTK	inhibitor of Bruton tyrosine kinase [Source:NCBI gene;Acc:421844]	-	-	-	-	GO:0005654//nucleoplasm;GO:0005737//cytoplasm	GO:0005515//protein binding;GO:0019901//protein kinase binding;GO:0030292//protein tyrosine kinase inhibitor activity	GO:0001933//negative regulation of protein phosphorylation;GO:0051209//release of sequestered calcium ion into cytosol
8	ENSGALG00000002771	11.3245	24.738	115	39	0.513	0.744	1.12728	0.00843034	1	up	CRIP1	cysteine rich protein 1 [Source:NCBI gene;Acc:101747696]	-	-	-	-	GO:0005737//cytoplasm	GO:0003680//AT DNA binding;GO:0008270//zinc ion binding;GO:0008301//DNA binding, bending;GO:0042277//peptide binding;GO:0046872//metal ion binding	GO:0008630//intrinsic apoptotic signaling pathway in response to DNA damage;GO:0010043//response to zinc ion;GO:0071236//cellular response to antibiotic;GO:0071493//cellular response to UV-B
8	ENSGALG00000048029	4.1954	0.580847	115	39	0.287	0.051	-2.85258	0.00336477	1	down	-	-	-	-	-	-	-	-	-
8	ENSGALG00000005750	3.97989	1.68368	115	39	0.383	0.128	-1.24112	0.00696566	1	down	SWAP70	switching B cell complex subunit SWAP70 [Source:NCBI gene;Acc:423044]	-	-	-	-	GO:0005634//nucleus;GO:0005737//cytoplasm	GO:0003677//DNA binding;GO:0005524//ATP binding	GO:0007204//positive regulation of cytosolic calcium ion concentration;GO:0008064//regulation of actin polymerization or depolymerization;GO:0016444//somatic cell DNA recombination;GO:0030835//negative regulation of actin filament depolymerization;GO:0032233//positive regulation of actin filament bundle assembly;GO:0032880//regulation of protein localization;GO:0033633//negative regulation of cel…
8	ENSGALG00000017129	4.43028	0.836572	115	39	0.365	0.128	-2.40484	0.00877169	1	down	SAP18	Sin3A associated protein 18 [Source:NCBI gene;Acc:374206]	Genetic Information Processing;Genetic Information Processing	Translation;Translation	ko03013//RNA transport;ko03015//mRNA surveillance pathway	K14324;K14324	-	-	-

## Sheet: GO Term response to stimulus
response to stimulus(GO:0050896)
	GO ID (level1)	GO Term (level1)	GO ID (level2)	GO Term (level2)	number(up)	number(down)	Genes_of_up	Genes_of_down
Cluster 0	GO:0008150	Biological Process	GO:0050896	response to stimulus	2	2	ENSGALG00000014297(IRF7),ENSGALG00000030871(BCL2L10)	ENSGALG00000012802(F13A1),ENSGALG00000027069(TSC22D3)
Cluster 1	GO:0008150	Biological Process	GO:0050896	response to stimulus	2	6	ENSGALG00000014297(IRF7),ENSGALG00000030871(BCL2L10)	ENSGALG00000012456(RAC2),ENSGALG00000012802(F13A1),ENSGALG00000014727(PDE4D),ENSGALG00000023294(RPLP0),ENSGALG00000027069(TSC22D3),ENSGALG00000030781(CA2)
Cluster 2	GO:0008150	Biological Process	GO:0050896	response to stimulus	1	0	ENSGALG00000014297(IRF7)
Cluster 3	GO:0008150	Biological Process	GO:0050896	response to stimulus	2	2	ENSGALG00000014297(IRF7),ENSGALG00000030871(BCL2L10)	ENSGALG00000002554(TSPAN2),ENSGALG00000030781(CA2)
Cluster 4	GO:0008150	Biological Process	GO:0050896	response to stimulus	1	4	ENSGALG00000030871(BCL2L10)	ENSGALG00000014811(SMCHD1),ENSGALG00000027069(TSC22D3),ENSGALG00000030781(CA2),ENSGALG00000041926(HEXIM1)
Cluster 5	GO:0008150	Biological Process	GO:0050896	response to stimulus	1	1	ENSGALG00000030871(BCL2L10)	ENSGALG00000039264(SLA)
Cluster 6	GO:0008150	Biological Process	GO:0050896	response to stimulus	38	15	ENSGALG00000001382(CDK11A),ENSGALG00000001907(WAPL),ENSGALG00000002548(TLN1),ENSGALG00000002594(TFPI),ENSGALG00000002655(ITGAV),ENSGALG00000005569(USP47),ENSGALG00000005668(WSB1),ENSGALG00000006418(PDPK1),ENSGALG00000006439(ARHGEF6),ENSGALG00000007145(ITGB1),ENSGALG00000007260(ZEB1),ENSGALG00000008206(TESC),ENSGALG00000008553(INO80),ENSGALG00000008756(PLEK),ENSGALG00000009927(RAP1B),ENSGALG000000…	ENSGALG00000002771(CRIP1),ENSGALG00000003570(PURH),ENSGALG00000011738(ARHGDIB),ENSGALG00000012357(CXCR4),ENSGALG00000012456(RAC2),ENSGALG00000016067(HMGN1),ENSGALG00000020002(SLC22A3),ENSGALG00000023294(RPLP0),ENSGALG00000027571(-),ENSGALG00000028204(GPX1),ENSGALG00000038636(LAPTM5),ENSGALG00000038951(RASSF1),ENSGALG00000042008(GSTM3),ENSGALG00000042148(FKBP51),ENSGALG00000050309(-)
Cluster 7	GO:0008150	Biological Process	GO:0050896	response to stimulus	59	23	ENSGALG00000000379(ITGB3),ENSGALG00000001328(BSG),ENSGALG00000001684(SEC14L1),ENSGALG00000001907(WAPL),ENSGALG00000002548(TLN1),ENSGALG00000002594(TFPI),ENSGALG00000002655(ITGAV),ENSGALG00000003409(SOGA1),ENSGALG00000003693(MACF1),ENSGALG00000003717(MYO9B),ENSGALG00000004496(TNIP1),ENSGALG00000004958(BTK),ENSGALG00000005061(PPM1E),ENSGALG00000005688(DNASE1L1),ENSGALG00000005902(RAB7A),ENSGALG0000…	ENSGALG00000002771(CRIP1),ENSGALG00000003570(PURH),ENSGALG00000005683(ARHGAP29),ENSGALG00000006583(LSP1),ENSGALG00000007418(CD3D),ENSGALG00000010175(HSP90AB1),ENSGALG00000010870(JUN),ENSGALG00000011190(PLAC8),ENSGALG00000011404(HOPX),ENSGALG00000012357(CXCR4),ENSGALG00000013624(FAM65B),ENSGALG00000015339(RPL24),ENSGALG00000016485(RHOB),ENSGALG00000017644(COTL1),ENSGALG00000023294(RPLP0),ENSGALG00…
Cluster 8	GO:0008150	Biological Process	GO:0050896	response to stimulus	1	1	ENSGALG00000002771(CRIP1)	ENSGALG00000005750(SWAP70)

[truncated: 2 more sheets: Go cell proliferation, Apoptosis]
